# Supplementary material for: Systems-level analysis of transcriptome reorganization during liver regeneration
Source: Royal Society of Chemistry journal article supplement (doi:10.1039/d1mo00382h), 2022-01-17
Supplement: d1mo00382h1.xlsx [file d1mo00382h1.xlsx]

## Sheet: Legend
	Legend
	CoreClusters - TFs	Enrichment of TFs for the core clusters in two datasets (GSE95135, GSE125007). Column corresonding to DREM lists the TFs with a score less than 0.001 as per the output in DREM2.0
	Path genes -data 1	Genes in each path of core clusters obtained from DREM analysis (GSE95135)
	Path genes - data 2	Genes in each path of core clusters obtained from DREM analysis (GSE125007) - validation dataset
	WGCNAmodule	WGCNA Module genes (GSE95135)
		*- uncorrected p-value

## Sheet: CoreClusters -TFs
Dataset1 - GSE95135
Cluster	DREM	ChEA	ENCODE and ChEA
1	CEBPB, NFATC2, NFATC3, NFATC1, NFATC4, JUN, JUNB, FOS, FOSB, JUND, FOSL2, SRY, BACH2, ALX4, NFE2L1, XBP1, SRF, GATA4, FOSL1, CD40, ARHGEF7, ETS1, SPIB, POU2F2, SLC22A1, STAT6, STAT1, POU3F1, ATF1, STAT5A, PRDM1, OTX1, OTX2, ERF, LEF1, STAT4, NFKB1, TBP	RXR, LXR, PPARA, CLOCK, ESR1, RELA, NUCKS1, NR1I2, PPARG, CEBPA, CEBPB, EGR1, OXA2, HNF4A, NCOR, TAL1, CEBPD, TCF7L2, Nerf2, IRF8, NFE2L2, NRF2, SREBP1, TCF3, TP53, SMC3	PPARG, NELFE, GATA2, TCF3, ESR1, SOX2, STAT3, MAX, SIN3A, MYC, GATA1, EGR1, CEBPB, HNF4A, SALL4, KLF4, ZMIZ1, POU5F1, TP63, NFE2L2, FOSL2, CREB1, CHD1, CEBPD, RELA, PPARD, RUNX1, SMAD4, BHLHE40, USF1, ZNF384, SMC3, UBTF, RCOR1, NANOG, PML, E2F1, FOS, TP53, NFIC, RFX5, TRIM28, ZBTB7A
2	E2F4, RB1, E2F5, E2F2, PTGDR, SRPR, E2F1, TFDP1, TFDP2, E2F7, NFYA, UBE4A, UBE4B, NFYB, PITX2, TRAF4, ALX1, NRF1	FOXM1, E2F4, KDM5B, MYC, E2F1, MYCN, E2F7, EKLF, NELFA, CCND1, MYBL1, KLF4, SOX2, ZFP42, NANOG, VDR, ASH2L, FOXO3, OCT4	E2F4, FOXM1, NFYB, SIN3A, NFYA, E2F6, E2F1, MAX, BRCA1, IRF3, SP1, ATF2, MYC, NRF1, FOS, CREB1, PBX3, PML, ZNF384, KLF4, YY1, TAF1, NELFE, SP2, ELF1, CHD1, TAF7, FLI1, NANOG, CEBPD, USF2, SPI1, CEBPB, SOX2, SIX5, TP53, RFX5, ZBTB33, SALL4, GABPA
3		RXR, LXR, PPARA, EGR1, ESR1, FOXO1, CLOCK, CEBPA, SOX2, NFE2L2, NRF2	HNF4A, RFX5, EGR1, NFE2L2*, ESR1*, FOXA1*, FOXA2*, ZMIZ1*
Dataset2 - GSE125007
Cluster	DREM	ChEA	ENCODE and ChEA
1	RB1, E2F5, E2F2, E2F7, PTGDR, SRPR, E2F4, TFDP1, E2F1, TFDP2, UBE4A, UBE4B, PAX6, STAT5B	FOXM1, E2F4, E2F7, AR, CEBPA, MYCN, E2F1, RELA, TRIM28, PPARD, BACH1, CEBPB*, MYBL1*, SMAD4*, CLOCK*, TP53*, TRP63*, TCF21*, ZFP281*, STAT3*, ESR1*, OCT4*	E2F4, FOXM1, SIN3A, E2F1, E2F6, NFYB, NFYA, TP53, IRF3*, KLF4*, SALL4*, FOSL2*
2	SOX5, SRY, NKX6-2, CREB1, PDX1, NFATC2, NFATC3, NFATC1, NFATC4, OTX1, OTX2, GATA2, GATA1, EFNA2, FOXL1, ELF2, POU2F1, TBP, GATA6, GATA3, NKX3-1, CDX2, CDX1, PLAU, CEBPA, ATF1, IRF1, GATA4, JUN, FLI1, CUZD1, HLF, ETS1, SPIB, TCF7, ATF4, LEF1, POU3F1, ATF2, ATF7, FOXD3, GATA5, ATF5, POU5F1, POU2AF1, PITX2	MECOM, ZFP281, RUNX1, PPARD, RELA, SMAD3, WT1*, IRF8*, RUNX2*, NFE2L2*, NRF2*, CEBPD*, SMC1*, MYB*, LMO2*, SMRT*, PRDM14*, EGR1*	E2F4, NANOG, SOX2, GATA2, NFE2L2, RUNX1, POU5F1, SMAD4, TCF3, TP53, GATA1, SUZ12, TRIM28*, STAT3*, SP1*, PPARD*, PPARG*
3		LXR, EGR1, RXR, PPARA*, ESR1*, FOXO1*, TP63*	EZH2*, SUZ12*

## Sheet: Path genes-data 1
AGPAT9	ABCA1	ACMSD	AASS	ACOT3	ACSS2	AURKA	ATAD2	AKR1C18	AK4	AACS	ABCD1	ACY1	ABAT	FDFT1	AADAC	ABCG8
ALG8	AKT1	ACOT4	ABCB4	ALAS1	AGXT2L1	AURKB	BUB1	ALDH18A1	AMD1	ACACA	ACP2	AMT	ACAT2	HPGD	ABCB11	ACSL1
ASNS	ALPL	ACVR1B	ACOT2	CYP17A1	AKR1D1	BUB1B	CDC25B	ALDH3B1	BARD1	ACSL3	ALDH4A1	AQP9	ACP5	MAST3	ACACB	ALAS2
ATP11A	APRT	ADCY6	ACOX1	CYP4A10	ANGPTL4	CDK1	CDC25C	ATP2B2	BLM	ADH1	CDS2	B3GNT1	ACY3	MT-ATP8	ACAD8	APOA2
B3GALT1	ATP1A1	ADH7	ACPP	G0S2	AQP8	CDKN3	CHEK2	DCK	BRIP1	ADH4	CSK	BCAT2	ADI1	NDUFV3	ACLY	BHMT
B4GALT1	CAD	AS3MT	ADCY1	GM3776	CAR1	ESCO2	COX6B2	GALNS	CDC25A	ALDH1B1	DAPK2	CTDSP1	ALDH1A1	PCBD1	ACSM5	CDO1
B4GALT5	CERK	CDA	ALDOA	GSTA1	CAR3	MAP4K4	DNMT1	NQO1	CDK2	ATP5J2	EPT1	CYP51	ALDH7A1	PEMT	AFMID	CYP2E1
BCMO1	CTSC	CPT1A	ALDOB	ISYNA1	CES1D	NEK2	GPX7	NUP205	CHEK1	CAR2	FADS6	DEGS1	BBOX1	RBP4	AGPHD1	CYP2F2
CD36	DDX39	CRAT	APOA5	MAT1A	CSAD	NEURL1B	HAT1	PAK4	CTPS2	CBR1	FGFR4	ENPP3	CDC14B	SC4MOL	AGXT	CYP4A12B
CP	DUSP3	DDX21	ARG1	MCM2	CYP2A4	PBK	MASTL	PCK2	DDX11	CHKA	GCLM	FKBP4	CMPK2	STARD5	AKR1C6	DCT
CTPS	EPHA1	DDX3X	ASL	MCM5	CYP2A5	PLK1	MCM3	PLA2G15	DHFR	CTSS	GPD1L	FMO1	CNP	TPST1	ALDOC	FITM1
DHCR24	FABP4	DUSP6	ATP1B1	MCM6	CYP2B10	TTK	MCM7	POLH	DTYMK	CYP21A2-PS	MAP3K13	HACL1	COMT	VKORC1	AMDHD1	HSD11B1
FKBP11	FH1	DUSP8	CTGF	MFSD2A	CYP7A1	UBE2C	MELK	PYGB	DYRK3	CYP2R1	MTHFR	IDI1	CRYL1	AC126942.1	ASS1	KHK
GPX3	FTSJ3	EGFR	DUSP4	NNMT	CYP7B1	STMN1	PIF1	SETD8	EZH2	CYP39A1	NAMPT	LCMT1	CTH	AKR1C20	BCKDHA	LIPC
GSS	GFPT1	EPHA2	DUSP5	NR1D1	CYP8B1	CDCA3	PKMYT1	TCIRG1	GRK6	DHRS9	PCYOX1	LIPA	CYP1A1	SCAND1	BCO2	MACROD1
HMOX1	GMPPB	EXTL3	ECI2	PLIN2	DHRS3	GM11223	PLK4	UAP1L1	GTF2F1	DUT	PDE3B	METTL7B	CYP26B1	HSPB1	BDH2	NAT8
IL18BP	HTATIP2	FADS2	EHHADH	REG3B	DUSP1	CCNA2	RRM1	LGALS1	LBR	FASN	PLCG1	MVK	DERA	RAET1D	CAMK1D	NAT8B
JAK3	IMPA2	GCNT2	ELOVL6	RRM2	EIF4EBP3	MKI67	SAE1	ARFGAP3	MCM8	FMO5	POLD2	NEU1	DHCR7	BAIAP2	CAR14	PKLR
LDHA	LHPP	GLYCTK	ETNK2	SLC16A5	ELOVL3	CKAP2L	TYMS	LUM	MDM2	FOLR2	PTPRF	NPC1	DYRK1B	GM12013	CAR5A	PLTP
LGMN	MAN2A1	GMDS	FABP5	SLC22A5	G6PC	TOP2A	UBE2T	TFF3	MTHFD1L	GALE	RPS6KA1	NSDHL	ENTPD8	SNORD104	CAR8	QDPR
LPGAT1	MAST2	GPD2	FITM2	SLC25A22	GCK	KIF20A	UHRF1	TMEM43	MTHFD2	GM2A	SGK2	NT5C3	ERBB3	MT-TD	CAT	SETDB2
MCM4	MAT2A	GRHL1	FKBP5	SLC41A2	GSTA2	CCNB1	VARS	ANXA2	NAA40	GPAM	SLC26A1	NUDT2	FAAH	BOK	CES1G	SLC13A2
MID1	MLKL	GSTT2	GDE1	SMPD3	GSTA4	CKAP2	2700094K13RIK	SPARC	NAGS	GSTM2	SLC6A13	POLR3K	FGGY	AVPR1A	CYB5R3	SLC22A30
NEK6	NME6	IDH3A	GOT1	ST3GAL5	HSD17B6	BIRC5	TCF19	COL1A2	NANS	GSTM3	SUV420H2	PRKACA	FPGS	CHAC2	CYP1A2	TDO2
NEU3	NUP50	IRAK3	GPCPD1	TGM1	INMT	TPX2	HMGB2	CXADR	NUP107	HMGCR	UGT2B34	RNF144B	GALM	GM16573	CYP26A1	TYMP
NUP93	OAT	LIPG	GPT2	USP2	LPIN1	NUF2	FEN1	CD276	NUP133	HNMT	UGT2B35	SLC16A12	GNPDA1	GM14303	CYP27A1	MUP-PS17
PGM3	PDIA4	MAPKAPK2	GYK	SAA2	LPIN2	KIF22	LIG1	MPP1	NUP35	LDLR	LOXL4	SLC2A1	GPLD1	GM5873	CYP2C29	AOX3
POR	PDIA5	METTL1	GYS2	LCN2	PCK1	HMMR	CHAF1A	INHBA	NUP62	LPL	ARHGEF19	SLC40A1	GSTM4	RHPN2	CYP2C50	MMU-MIR-2134-4
PPAP2C	PGM1	MGLL	HECTD1	SAA1	PPP1R3B	ECT2	TUBB5	MTMR11	NUP85	LSS	LRRC3	GM13502	HAGH	CYP2C68	CYP2C55	MUP7
PPAPDC1B	PGS1	MYBBP1A	HSD17B7	SAA3	PPP1R3C	MAD2L1	CDCA5	KRT8	PAPD7	MGST3	KANK2	IGFBP2	HDAC5	ARL4A	CYP2D22	MUP17
SLC10A2	POLR3D	NEK7	MAP3K6	MT2	RNF125	SHCBP1	TUBA1B	SLC22A26	PGP	MVD	STEAP3	AKR1C19	HECTD3	TMC7	CYP2U1	MUP15
SLC13A3	PRUNE	NOP2	NEDD4L	D17H6S56E-5	SDS	TACC3	CDT1	MTNR1A	PIGA	PDXK	SLC25A23	MBL2	IPMK	RHOBTB1	CYP4B1	MUP14
SLC16A1	PTP4A1	OPLAH	ODC1	MT1	SLC17A8	SPC25	NCAPH	GM12428	POLA1	PLK2	FAM20C	1110067D22RIK	KYNU	GM4149	CYP4F14	MUP12
SLC16A6	PTPN1	PFKFB2	PDK4	LY6D	TAT	NUSAP1	REEP4	FAM110A	POLD1	POLA2	CLDN3	NFIL3	LPCAT3	GM9846	CYP4F15	MUP1
SLC1A4	PTPN2	PIK3C2A	PEX11A	CDC20	UGT2B1	PRC1	NDC80	RHOC	POLD3	PTGDS	S1PR1	CRY1	LRAT	GM5805	CYP4V3	MUP11
SLC20A1	SDC1	PLA2G12A	PFKFB3	CXCL1	UPP2	CENPA	GM14150	MFGE8	POLE	PTGR1	ST5	HDHD3	MAOB	0610007P14RIK	DAPK1	ARL4D
SLC37A1	SLC12A4	PLK3	PIM1	ORM2	HSD3B5	SMC4	NCAPG2	MYH10	POLE2	RBP1	HFE2	SLC25A48	MGMT	AC099934.1	DCXR	MUP19
SLC39A14	SLC13A5	PPAT	PIM3	SERPINA3N	IGFBP1	INCENP	ZWILCH	ILDR2	POLE3	SLC16A7	CXCL12	SLC30A10	MMAB	AC157822.1	DDAH1	MUP16
SLC3A1	SLC39A1	PTPLAD1	PLIN4	CIDEC	SERPINA4-PS1	KIF11	OIP5	TXNDC5	POLQ	SLC22A7	MARVELD1	FOXA2	MPST	GM10180	DDC	MUP8
STK17B	SLC41A1	RNF144A	PNPLA2	PRTN3	RGS16	SMC2	CDCA2	PCOLCE	PPIH	SLC36A1	FAM55B	FOXA1	MTHFD1	LIMS2	DGAT2	MUP9
SULT1A1	SLC4A4	RNF19A	PPARA	TIFA	THRSP	D2ERTD750E	SERPINB8	GPC1	PPIL1	SLC6A6	RTN4RL1	MPZL2	PAPSS2	GM4613	DHDH	MUP18
SULT1E1	SPTLC2	RRP8	RCL1	A2M	SCD1	ANLN	CKS1B	TTC39A	PPM1G	SQLE	GAS2	BC089597	PARP16	1600014C10RIK	DHTKD1	MUP2
TGM2	SRM	SGMS1	SDSL	CCNB2	ADCK3	OSTB	E130306D19RIK	KPNB1	PSAT1	SREBF1	DSC2	DHRS7	PFKM	TMEM14C	DPYS	MUP13
TREH	ST3GAL1	SLC22A3	SGK1	CYP4A14	GM4956	RACGAP1	DLGAP5	E2F2	PYCRL	SYVN1	KANK1	PLEKHF1	PNPLA3	SLC35E2	ECHDC1	MIR122A
UBE2S	ST6GAL1	SLC30A1	SLC10A6	GM20419	HAMP2	ARHGAP11A	KIF4	SNX7	RAD18	TK1	SHANK2	PRLR	POLR3G	RPS26-PS1	EIF4A2	MUP-PS19
UCP2	TM6SF2	SLC43A1	SLC16A10	STEAP4	HSD3B3	CDKN2C	CDCA8	PLS1	RFC5	UBE2U	SAMD1	ITGB5	PRKD3	SLC50A1	ELOVL5	GM15889
VNN1	TXNRD1	SLC5A6	SLC25A15	APCS	MMU-MIR-689-2	NCAPD2	ASF1B	6330416G13RIK	RFWD3	UGT1A9	1700066M21RIK	RASSF7	PRODH2	H2AFJ	FABP1	MUP20
WEE1	UGGT1	ST3GAL4	SLC34A2	APOA4	DDIT4	GTSE1	PRIM1	SLC22A27	RTEL1	UROC1	AI464131	H2AFV	PTK2B	EBPL	FDPS	SLC22A28
CRELD2	XDH	STK38L	SLC38A2	CDKN1A	8430408G22RIK	MYBL1	2610002D18RIK	SULF2	RUVBL2	MMU-MIR-2134-2	1300014I06RIK	HSF2	PTPRD	SNAI2	FN3K	TCP11L2
IL1R1	IL1RN	TIPARP	SLC7A2	TUBB6	SCD3	KIFC1	RFC4	ANO10	SLC39A5	SPC24	DEPDC7	IRF6	RNF103	HIST1H2BG	GAMT	GBP10
BTG2	CD14	UGCG	SOD2	OSGIN1	TRP53INP1	FOXM1	CDC45	UNC119	SUV39H1	9030619P08RIK	TOB1	VMO1	RNF152	GM11844	GCAT	MUP5
CGREF1	ID1	GDF15	TBL1XR1	CCND1	KEG1	SLFN9	DIAP3	RNF26	SYCE2	SLC46A3	DSP	OLFR1033	SARDH	GM10036	GCLC	TTC39C
TSKU	D10WSU102E	TLR12	TENC1	FGL1	SELENBP2	IQGAP3	TOPBP1	MYEF2	TAF9	PCSK9	MOV10	RDM1	SEPHS2	GM17586	GLO1	MT-TS1
NRG4	WDR92	GM13086	UCK2	2010003K11RIK	HSD3B2	KIF2C	POC1A	VANGL1	UHRF2	HBB-B1	REPIN1	XKR9	SGMS2	TMEM50A	GLS2	GM5096
TACC2	1700017B05RIK	GADD45B	PPP1R3G	SYT12	MAFB	C330027C09RIK	4930579G24RIK	MAGED2	USP1	GM8203	AI661453	SDHAF1	SGPL1	5430407P10RIK	GNMT	MUP-PS18
LEPR	SDF2L1	PER2	NR4A1	DBP	2810007J24RIK	GM6682	CENPE	AI428936	VRK1	HBA-A2	NOTUM	RAP2A	SHMT1	RPL35A-PS5	GSTA3	MT-TT
2810408I11RIK	ABCD2	3930402G23RIK	HHEX	GADD45G	GM13775	COL1A1	KIF20B	CCNG1	WHSC1	SPON2	KLF12	VEGFB	SIRT7	ZFP385B	GSTM1	MCM10
BMPER	ZC3H13	TLR2	SLC25A47	INHBE	SUCNR1	SPINK3	FIGNL1	ESR1	PCNA	COL3A1	PROSAPIP1	FGFRL1	SLC10A1	SPP2	GSTP1	TSC22D1
GM11843	ARHGEF26	NCEH1	ACOT1	CENPM	TXNIP	GOLM1	NCAPG	HSPA4L	GMNN	H2AFZ	RTP3	TMEM86B	SLC16A2	GM10275	GSTT1	BHMT-PS1
ATF3	DNAJB9	CISH	1810055G02RIK	HAMP	1810011O10RIK		PRR11	SSBP4	RPA2	HBB-B2	ABCA2	CRELD1	SLC24A6	GM10029	HAAO	GM16002
SERPINA10	MANF	SNORD12	GM15441	TNFRSF12A	MUP21		GM17383	ELF3	DTL	CKS2	SUSD4	TMEM9	SLC35D2	GM13826	HAL	ACAA1B
A1BG	GM15502	SERPINA3E-PS	FGF21	SOCS3	GM14097		DNAJC9	CAV2	PCNA-PS2	HBA-A1	NR2F2	CUX2	SLC44A1	DIRC2	HDAC11	MUP-PS8
UNG	PIK3AP1	ENC1	KLF10	ACNAT2	ABCA8A		F630043A04RIK	CD9	GINS1	HJURP	RNF181	2210021J22RIK	SLC46A1	OMD	HIBADH	CYP2D37-PS
CLDN14	GM11963	H3F3B	NR1I3	GM6484	INSIG1		E2F1	ABCB1A	HELLS	CYP3A59	GM15318	MYO1B	SLCO1B2	ARF5	HSD17B2	9130409I23RIK
S100A11	FAM25C	TBX3	CEBPB	LRG1	1500017E21RIK		AAAS	IL33	HMGN2-PS1	PAQR7	MSH6	AHCTF1	SORD	NTHL1	HSD3B6	MUP10
PLSCR1	SERPINA7	TAGLN	SNORA73B	DERL3	CYP4A12A		GM5620	HEBP2	NT5DC2	ENHO	AI182371	1110065P20RIK	SPHK2	RPS28	HSD3B7	CYP2C69
TAGLN2	IL17RA	SNORD50	GM129	CYP4A31	ARNTL		DEPDC1A	UTP14B	FANCB	PMF1	CELSR1	BCL7C	STARD4	MRPL14	HYI	IGHM
JUB	BHLHE40	CYR61	CEBPD	MARCO	CHRNA4		CENPP	5730419I09RIK	CHAF1B	RORC	BCAR1	4931406C07RIK	TARS	MTFP1	IDO2	CES2A
JUNB	SAA4	SNORD18	TEF	HP	MT-TQ		KNTC1	ANTXR2	CDC6	GM10639	DLC1	CAPN10	ULK2	DEDD2	IP6K2	MUP-PS13
AC110211.1	SERPINA3M	SNORD100	FBF1	EGR1	TSC22D3		SGOL2	CORO1C	CCNE2	CCL9	NID2	CAMK2N1	VNN3	RPS29	IVD	NUDT7
FGA	GM8783	KLB	EFNA1	AC163694.1	GM13773		TMEM48	CYP4F16	GM16165	HSPA1B	DAAM1	TMEM106C	PHLDA1	GM17251	MAP2K6	CYP2C54
ID3	GM15801	GABBR2	NR1D2	ACTG1	CIB3		LMNB1	GM12750	RFC2	CYP2C38	SLC25A45	TMED1	HIST2H3C2	UBXN1	MAPK15	MUP3
ACTG-PS1	MBD1	EPB4.1	RASGEF1B	ORM1	KCNK5		CENPF	PDLIM7	MMS22L	MID1IP1	RASSF8	CACYBP	CLDN1	PXMP2	ME1	MUP-PS14
S100A8	HSPA5	MYD88	NLRP12	GM12715	SERPINA12		RAD51	LHX6	RPA1	SLCO1A4	TDP2	MRPL49	FBXO21	DGCR6	METTL7A1	CES3A
ITGA5	TM4SF4	TMEM86A	PER1	DNAJC12	CES3B		4632434I11RIK	CLINT1	PRIM2	ZFP385A	ATL3	RPA3	MARCKSL1-PS4		NDUFA6	FAM198A
SIK1	HSPH1	CDC42EP5	SLC25A25	ORM3	HERPUD1		KIF18B	EXOC4	HIRIP3	HAUS4	RARA	FAM3A	PNKD		NIT2	CD74
S100A9	TMEM41A	ACTA2	MAFF	GM20400	CES1E		SPAG5	SECTM1A	HAUS1	LYZ2	CXXC5	AGMO	D730039F16RIK		NOX4	CLEC2D
PPL	GM5582	FOS	SNOZ40	SERPINE1	CES1F		TUBA1C	LSR	GM16550	GM15998	PPFIBP2	ORMDL1	IGFALS		NPAS2	CELA1
RDH9	SYNPO	FAM102A	SOCS2	GNAT1	CML5		CENPN	RCOR1	HMGA1	LECT2	PROZ	CYBASC3	MT-TE		NQO2	GM6907
CPNE8	GM8355	ASAP3	PLIN5	SLC25A30	ARRDC3		TUBA1A		RAD54B	1810019D21RIK	SESN3	CYB5	OLFML1		OTC	CYP2C40
NIPAL1	TMED3	DACT2	GM9847	H2AFX	FAM134B		CENPQ		MLF1IP	TNFAIP2	DNAJB2	BC025446	CYP3A25		PAH	GSTM6
RCAN1	TRIM24	TMEM87B	APBB3	ITIH4	N4BP2L1		GM5593		LSM3	PCP4L1	F7	HEXIM1	DCLK3		PAOX	SLC25A33
GM6788	GM13363	DPP9	AL627182.1	PRG4	CML1		CENPT		TIMELESS	GM17646	2610507I01RIK	1190005I06RIK	MIR5125		PDE9A	1700001C19RIK
GM7694	CREB3L2	ADCK4	SNHG3	IFI27L2B	SLCO1A1		GM10259		HAUS3	GBP11	CEBPE	RBPMS2	FOXQ1		PDK1	MUP-PS20
CCNE1	XBP1	RNF186	SNORD101	GM15611	HES6		GM10184		BRCA1	CBY1	AQP11	YPEL5	AGFG2		PDK2	CYP2C37
ANG	TMEM120A	RALGAPA2	HILPDA	GM11695	D0H4S114		NRM		RAD51AP1	MMP15	KLHL5	TMCC1	BCAR3		PECR	MUP-PS7
BCL3	TMED5	ARID5A	INSIG2	AKR1B7	LEAP2		DBF4		TINF2	GPSM2	PRPSAP1	TRADD	FAHD1		PIPOX	GM4477
GAS6	TPM1	ERRFI1	HIST1H1C	SLPI	GM2788		FAM83D		GM13237	CYP2B9	MFHAS1		TMEM25		PMVK	GM11832
NID1	COQ10B	SNORD51	CYP4A32	HPX	CLEC2H		CENPH		CRIP2	GM17492	1500031L02RIK		ABTB2		PON1	IFIT1
FGB	SERPINH1	RND2	TNFRSF1B	GM8399	ZBTB16		HMGN2		ZFP367	GM6665	ASB13		WDR91		PPM1K	MUG2
GM12840	CYP2C39	HES1	ARRDC4	CNTNAP1	GM17498		CCDC99		MDC1	SIVA1	RDX		GLT1D1		PPP1R1B	AC163389.1
SCARA5	ZFP9	SNORD19	ID2	RAB30	PNRC1		TRIP13		SNRNP25	LASP1	RGL3		MIR1968		PRODH	ARRDC2
TUBA8	SNORD65	CDCA7	IRS2	ABHD2	NEAT1		TRIM59		DEK	2810405K02RIK	MUTED		SERPIND1		PYGL	SCO2
DYNLL1	HSP90B1	SNORD49A	MCART1	ICAM1	FBXO31		GINS2		TRAIP	TMEM97	HS1BP3		TMEM218		RDH11	COL27A1
GM15344	TTPAL	NIACR1	SERPINA3F	CYB561	SERPINA1E		4930547N16RIK		NSL1	GM13021			GM10768		RDH7	GHR
BTG3	FAM187B	PROX1	1300015D01RIK	KPNA2	GM12265		RBL1		FBXO5	MPEG1			CYB5B		SC5D	HSD3B4
CD5L	MRAP	HSDL2	TM4SF20	ITIH3	RND1		4930427A07RIK		TIPIN	CYP3A44			SORBS3		SCD2	GM10681
TIMP1	COBL	CLDN2	GM10309		ATOH8		DSN1		PHLDA3	C330021F23RIK			IFI47		SDR9C7	IGFBP3
NUCB2	1700024P16RIK	AC122359.1	SNORD45		SERPINA3K		TMPO		FANCI	GM6020			SIGMAR1		SLC17A4	GABARAPL1
FGG	CSRP1	SNORA41	TBC1D8				MXD3		GM10282	PTER			LRRC16A		SLC19A2	GM12718
NOP58	CLN6	NUDT18	SOCS1				GM3756		BC030867	BC048355			PXMP4		SLC29A1	GM10319
LASS6	EIF6	FOXA3	3110043O21RIK				CENPW		SKA1	BC021614			FRMD4B		SLC47A1	H2-AA
FLOT1	BC048546	HIP1R	SNORD69				HN1		CALM3	GM12891			ZFP36		SRD5A1	GM13824
APOC2	RBM3	2400009B08RIK	AC124681.1				CDKN2D		2810417H13RIK	ATPIF1			PBLD1		SULT1B1	5033411D12RIK
TSPAN4	HSPB8	TFRC	CSRNP1				TUBB4B		GEMIN6	GM15343			ACAT3		SULT1C2	CYP2D9
TMEM98	GM14387	RASD1	SNORD5				CEP55		ORC6	TMEM141			LSM10		TM7SF2	CYP2C67
RAPH1	IGDCC4	SPNA2	CCNL1				KIFC5B		CALM2	TMEM53			PION		TRIB3	IZUMO4
ALPK1	FARP1	ADAMTS1	GM5970				KIF23		FAM54A	ALDH1A7			ZFP395		UBE2H	MUP-PS6
ETS2	BC029722	FAM84B	SNORA24				CENPK		DNAJB1	GYPC			PRSS8		UGT1A5	UOX
GM5549	DNAJB11	IL22RA1	WSB1				ANKLE1		SPATA24	GM17385			SH3BP5		UGT2A3	B430119L08RIK
BHLHA15	NOP56	ZFPM1	3110082I17RIK				TROAP		XPO1	LY6E			1810034E14RIK		UGT3A1	MUG1
HYOU1	PPP1R10	WNT5B	PAQR9				ARHGAP19		DDIT3	A230050P20RIK			DOCK8		NR0B2	HIST2H2AA2
PRELID2	SRXN1	CRYBB3	SCARNA4				GM4694		SNORA2	CLEC4F			ABCA8B		SERPINA6	SCNN1A
MLEC	PKDCC	JUND	ONECUT1				SGOL1		EME1	H2-Q6			SEMA4G		APOL7A	GM16124
JUN	C1QB	GM6493	IFRD1				ERCC6L		XRCC2	9030617O03RIK			RGN		BC029214	CES4A
CCL6	COL15A1	TMTC2	TRIB1				GM14276		MIS12	GM17316			IGFBP5		ADRA1B	CYP2D12
E2F8	HAPLN4	TNFAIP3	GADD45A				GSG2		DYNLT1F	ANKS4B			AW112010		AKR1C14	AI317395
LBP	SRRM4	MFSD7C	BC057022				9530077C05RIK		SALL1	IRF1			PTMS		APOL9B	MUP-PS2
C3	OSTC	SERPINA3G	BCL2L1				SMTN		RAD21	ADAM11			C130074G19RIK		SPATA2L	GM17566
KRT18	SLC17A9	ARFIP2	4933426M11RIK				CASC5		ZCWPW1	GSTT3			0610005C13RIK		MREG	MUP-PS10
BC046404	TOR1B	HEATR1	LGALS4				CENPI		HAUS6	FAM100B			SH2D4A		TLCD2	PDILT
FAM81A	GM8865	RETNLG	SNORA57				GAS2L3		DYNLT1A	TERF1			NGEF		TJP3	CML3
GFRA1	SLC41A3	TEAD1	SNORA25				FAM33A		AC175035.1	STBD1			UBC		TCEA3	INCA1
DNAJC10	GNL3	GPATCH4	REG3G				YWHAH		2700029M09RIK	MIR192			D630039A03RIK		BCL6	HIST1H2AL
GM6939	RPAP3	SNOU83B	TOR3A				G2E3		RFC3	CDK2AP2			ZFP467		ETHE1
GM7334	GM10156	ADORA1	SLC22A21				ESPL1		RBBP8	SMOC2			ECHDC3		MT-TP
TMPRSS2	BAZ1B	RRS1	TOB2				ASPM		2610039C10RIK	MUP-PS4			FOXO3		CLPX
SNX10	PPP1R14B	LAMB3	PER3				CKAP5		PSMC3IP	STOM			SEC14L2		MT-TI
GM14420	AL646020.1	PRKAB1	MIR186				DEPDC1B		WDR62	MSLN			DSG2		APOL9A
FN1	LEPRE1	GNL2	SNOU6-77						RANBP1	VSIG4			FAM149A		MME
MVP	PAWR	SH3BP2	SERPINA3C						RAD9	NICN1			EPS8L2		GM4952
CD63	ACNAT1	GJB2	PPTC7						TMEM194	SPP1			ZFYVE1		YPEL2
WBP5	SKI	RTN4RL2	GM15035						5930416I19RIK	PKP4			ZFYVE21		NRN1
FNDC3B	CCNF	DDX28	MTSS1						PTMA	IL6RA			DEXI		PPARD
LRRC59	FAM83A	GTF2B	KLF2						GM12856	SNORA28			SPSB2		CYP2C70
RNASE4	RCAN2	AGAP2	FST						CCDC34	H2-Q1			D4WSU53E		GBP6
CCDC120	TMEM39A	ACTB	JMJD1C						ERI2	PROM1			NLRP6		NDRG1
9030625A04RIK	NDE1	CYB5D1	AMIGO2						GM13167	MMD2			DYNLL2		PSEN2
CASKIN2	ITIH2	KLHL25	SNORD14A						HAUS5	GM10736			TUBA4A		TMEM150A
TNFRSF1A	PSPC1	EFHD2	RAPGEF4						4632419I22RIK	ITIH5			METTL7A2		CYP3A11
GM15459	S100A6	RHOB	AL591584.1						TUBGCP2	MFSD12			D930015E06RIK		GM3571
HSPA8	TSR1	ALKBH2	GM11752						GINS3	GVIN1			FAM176A		CES2C
CXCL14	ARMCX3	TNIP2	CHRNA2						1500010J02RIK	XRCC1			DNASE1L3		MMU-MIR-2134-1
ZBP1	TMEM176B	ANKRD2	CML2						LIN54	1810037I17RIK			SMAGP		MT-TM
IER3	TMEM62	PDGFA	L3MBTL3						BUB3	GM4070			GM10395		CCNG2
COL4A1	ZFP809	RELL1	SNORD53						LIN9	AI314976			GM9746		GM11437
RANGAP1	ERLIN1	PRRG4	GPR146						FAM72A	CDKN1C			5830473C10RIK		BTG1
BAG3	EMILIN1	SHB	SNTB1						CLSPN				D14ERTD449E		CYP2C44
TPM4	SSX2IP	LYSMD2	CCDC21						NFXL1				TBC1D30		FAM89A
HN1L	CYP3A13	CASP8	CREB3L3						CHTF18				C2CD2		SLC45A3
LITAF	C4BP	MLLT4	SLC25A32						DCAF15				FAM20A		ANUBL1
LMNA	NRP1	IFFO2	RFXANK						GM13232				RMND5A		MLXIPL
SLC30A5	CCDC86	CCRN4L	FAM124A						LRR1				SSBP3		MT-TW
THBD	STX18	ZC3H12A	SKIL						STIL				AFM		COL5A3
MTAP7D1	SEBOX	ZYX	ZBTB7C						PSIP1				MBLAC2		CES2D-PS
MMP14	AEN	RHBDD2	SNHG5						HYLS1				NIPSNAP1		GAS1
GM12346	SRPRB	TBRG1	TLR5						RTKN				OAF		GRB7
9430037G07RIK	CDC42SE1	BACE1	DDHD2						KIF15				GNG11		MCC
GRN	SRSF7	IL17RB	KLF3						TUBG1				OIT3		RSAD2
HSP90AA1	LDHA-PS2	AIFM2	A930039A15RIK						NGFRAP1				1110020G09RIK		ANGPTL3
PLXNB1	MORC4	MED22	NOSTRIN						IFRD2				IRF5		CPEB2
KLF6	SCAMP5	SOWAHC	1200007C13RIK						CBX5				NUDT16L1		CITED2
MYO1C	NUCKS1	CSF1	2900026A02RIK						METRN				PRNP		LIFR
IFITM2	TXLNA	APEX1	ARL15						ANP32B				TCTA		KLF15
KCTD17	IER5	IRGQ	SERPINA3I						CENPL				D930048N14RIK		GM12563
PPRC1	SLC35B1	TLE3	MPPE1						6720463M24RIK				DOCK6		BBC3
GOLT1B	EIF2B4	CTIF	GM15287						MAZ				IRS1		TMIE
MYH9	SSR3	FLNB	CYP4F17						SLC30A3				COLEC11		2610528J11RIK
TFDP1	RAB11FIP4	SLC52A2	IL1A						ARL6IP1				ACOT13		IFIT3
CFH	TCF7	EEF1E1	RSAD1						ARF2				FBXO3		BC031353
GM5844	AI848100	GRINA	WDR73						PCBP4				TFPI2		MIR5105
PROS1	TRMT61A	C2CD2L	BACH1						HAUS8				THNSL2		SELENBP1
QSOX1	AI597468	FUBP1	APOLD1						CENPC1				AGTR1A		IRF2BP2
CLP1	2610034B18RIK	RRP12	4933421A08RIK						GINS4				ABCB10		KLKB1
IL13RA1	ELL	MCTP2	EPAS1						ERI1				NDRG2		KLK1B4
TMEM176A	ONECUT2	CREM	CBFA2T3						LSM2				GTL3		2210411K11RIK
KCTD3	PPAN	PALMD	GM17132						SLBP				CTNNBIP1		ADH6-PS1
TBL2	KNG2	GCC1	C130039O16RIK						UBAP2				SFXN5		GPR110
GM16332	SFPQ	RND3	DOPEY1						SASS6				NR2F6		9030622O22RIK
NFKBIZ	CERKL	STAP2	IPO4						BRD9				CD82		FAM13A
FRRS1	PZP	GM11008	ZFP655						RAD51L1				PHLDB3		CISD1
TPD52	SEL1L3	WIPF3	CEND1						VBP1				P2RY4		IL18
STAT3	SUN2	PICALM							RQCD1				ACBD5		MT-RNR2
2021-09-11	6430548M08RIK	CCND3							HMGB3				MXD4		CXCL9
LTBR	GM9761	GM11974							ILF2				TMEM220		ABHD14B
FLOT2	MSRB3	P2RY2							TONSL				TXNL4B		SCD4
RPP38	MORF4L2	CDC42EP1							NCAPD3				ABCC6		GM4459
	HSPA13	TBC1D24							RAN				GPR155		PBLD2
	CPD	ARF4							GM13461				CASP9		CES2E
	LMNB2	PDZRN3							D2WSU81E				CRY2		GM5424
	CALU	NFKBIB							NCAPH2				PTH1R		H2-AB1
	GRWD1	NOS1AP							SRRT				FAM69A		TSTD1
	GM14421	D5ERTD579E							SAC3D1				GULO		MIRLET7D
	AIM1	SLC10A3							DLL1				COLEC10		GM20319
	PLEKHA8	DNAJC3							MIS18BP1				ACBD4		H2-EB1
	EIF2C2	TAF2							LARP7				PPP2R5A		ARHGEF37
	GM1821	GM9432							GM7367				F2R		LRIT1
	SERTAD1	WDR45L							CDKN2AIPNL				RARRES2		HIST1H2BF
	EHD4	NOL10							ARHGDIA				UGT2B5		4933403F05RIK
	TRAK2	WDR43							BC052040				SESN1		TMEM14A
	RNF145	LRP4							RAD54L				NFIX		PDCD4
	2510049J12RIK	E130012A19RIK							NFATC2IP				HNF1B		BC023105
	NOLC1	ZFP612							ANAPC5				BST2		GSTP2
	ETV6	GM10509							CSE1L				GM16548		KHNYN
	FOSL2	MARVELD3							SNRPD1				CBX2		OCLN
	WDR1	PLEKHA7							AFP				2610029I01RIK		GM10307
	SPNB2	ERC1							L3MBTL2				AKR1C13		ANP32A
	SEC61A1	TMEM82							APITD1				VMAC		ADCK5
	PLEC	5730508B09RIK							NUDCD2				SVIP		FDX1
	NOL8	ARL2BP							RNASEH2B				PHF1		GSTM7
	PDE12	IPO5							G3BP1				DIXDC1		CIRBP
	TMEM214	INTS7							GEN1				FAM82A1		KLHL24
	SNORA4	NCDN							WDHD1				F11		TMEM140
	LYSMD3	HIF1A							TTF2				PM20D1		MIR1948
	LRP1	MMADHC							PTGFRN				ENPP5		CEBPA
	ZC3H7A	RHBDF1							LMF2				ALB		SULT5A1
	SLC39A1-PS	SDAD1							ZRANB3				TMPRSS6		MT-RNR1
	OSMR	CAST							NXT1				RUFY3		1700080G11RIK
	RNF24	MYL12A							S100A4				SAMD8		RTP4
	FAM59A	SEC23A							BHLHB9				2300009A05RIK		STAT5B
	IBTK	DCAF5							FANCA				1110049F12RIK		GSTM2-PS1
	ZFP445	SLC35A4							GM9800				FNIP2		GRK5
	SRSF3	TMEM125							KLF16				GM11789		SERPINB1A
	ARF6	E2F3							NMRAL1				1810031K17RIK		DEFB1
	GAN	MAFK							MIIP				DLG3		MUP-PS1
	BAZ1A	AK3L2-PS							ILF3				CFHR1		YPEL3
	GJA4	CEP170							FANCD2				B2M		RILP
	TMEM189	SIDT2							ALS2CR4				ITM2B		TTR
	FAM118A	DNTTIP2							EXO1				GM10658		PDZK1IP1
	TCERG1	RASSF1							TRIM37				PRKRA		3010026O09RIK
	GM12355	PCID2							TUBD1				NUDT16		OCIAD2
	SBNO2	SEMA6B							GM13056				CCDC162		UGT2B36
	ZYG11A	CLCN7							UACA				AKR1C12		1110054M08RIK
	SMG5	INSC							BC055324				VAMP5		GM13194
	G3BP2	UBXN2A							PLP2				AAGAB		HEBP1
	CLU								MRE11A				ABTB1		ODF3B
	2700078E11RIK								CCDC77				PIGYL		GM12354
	MPHOSPH6								CEP192				2510002D24RIK		GM17196
	C4A								UBB				NUDT6		GM11967
	TPM3								AHSG				PGRMC2		9430023L20RIK
	SF3A1								GM4169				CNNM3		TTC36
	C4B								NEIL3						LACTB2
	XPO5								PRCP						ROPN1L
	AW555464								GM13160						A2LD1
	CBFB								CDK5RAP2						FAM158A
	INF2								NSMCE1						CYP3A16
	CDC27								ALYREF						MUP-PS15
	1700001L05RIK								GM15428						BPHL
	CDCA4								UBL4						2310001H17RIK
	TRIP6								MDM1						BIK
	BAK1								2310061C15RIK						TPRKB
	MMGT1								RBMX						BMF
	AP1AR								NUBP1						ANGPTL6
	PPP4R1								FAM111A						CALCOCO1
	EIF4E								ANP32E						FZD8
	NACC1								TRIM47						2410004N09RIK
	TPR								RBBP7						GM12909
	ZW10								IPO9						A930001N09RIK
	ZFP948								2610021K21RIK						GSN
	SKAP2								HNRNPAB						ALKBH7
	ASXL1								PTBP1						APOC1
	TTLL4								5730559C18RIK						TLCD1
	MYO18A								KIF14						HIST1H2BC
	TNFAIP1								ANP32B-PS1						1110020A21RIK
	DST								PSRC1						ECM1
	FAT1								GSTCD						GJB1
	PRRC2A								WDR76						DSG1C
	LRRC8A								TNFRSF10B						LRIT2
	RHBDF2								WDR67						5730469M10RIK
									SNRPA1						LECT1
									SSRP1						KCNN2
									C230052I12RIK						MAGIX
									TXNDC12						CMTM8
									E130303B06RIK						MPV17L
									FGFR1OP						D130020L05RIK
									2010317E24RIK						GM11128
									RAD51C						SERPINF1
									2021-09-10						1810049H13RIK
									BRCA2						CPSF4L
									GM12372						PCMTD2
									SUZ12						GM11266
									SYNGR4						GM13443
									NASP						APOE
									6330503K22RIK						GPR108
									GM9008						C8G
									GNAI2						CYP2D11
									CEP76						HRSP12
									CAMK2N2						CYP2D10
									RP23-358B23.3						LYRM5
									ZMYND19						PPDPF
									EFTUD2						TMEM205
									CDCA7L						1110001J03RIK
									RAVER1
									DONSON
									IFT80
									GM6724
									CEP72
									2310008H04RIK
									NTF3
									PELP1
									WDR90
									MAPRE1
									MNS1
									SYBU
									1700045I19RIK

## Sheet: Path genes-data 2 (validation)
UHRF1	SCML2	CDC45	KLF6	H19	TBX2	CAV2	NGFR	ITGB2	LHX2	SEPT1	TSPAN32	ITGB2L	SULT5A1
UBE2C	SLFN4	ICOSL	TMPRSS2	PIH1D2	AXIN2	RPA1	TFE3	ALOX12	MNT	GM2A	COMT	VPREB3	IL12RB1
FOXM1	TIMP1	TUBB6	ITGA5	CKMT1	GRASP	ILF2	CCND2	REM1	CDH4	SEMA4F	MX1	EFNB2	SLC13A2
KIF20A	MARVELD3	CCNE1	COL1A1	BCL6B	LOXL3	PCNT	DGKE	FAP	ACVR1B	ICAM4	HAAO	NFIX	INMT
MCM5	SPAG5	DBF4	TUBB5	SOX9	MMP14	FKBP10	TUBGCP3	LCK	ZFP385A	ITGB7	SERPINF1	PNCK	KRT23
ASF1B	SLPI	CHAF1A	PEG3	TCF7	B9D1	BMP8B	FMR1	PDGFB	HOXB6	PAX9	TXNRD3	RPL3L	MID1IP1
CDC20	ISYNA1	MCM2	HMGN2	S100A6	PCBP3	TIAM1	SMARCB1	DYNLT1C	PXMP4	IL16	CNN1	IKZF4	PTGDS
KIF11	CYB561	SPC25	RAB3B	C1QL4	KPNB1	ZFP40	HIP1R	HK2	MMP11	GRIA3	MEOX1	GRIN2D	PLXDC1
NCAPG	MOXD1	CDT1	DNMT1	SEBOX	LTBP1	PLIN4	ICAM2	CD52	HOXA4	SRPK3	GSTT1	DLGAP1	SLC2A4
CDC6	SLC1A4	POLE	HIF3A	CKB	RHOC	TBC1D8	NHP2	FASL	COL6A1	MYBPC3	VSIG2	PRODH	SLC17A8
BIRC5	PIMREG	RAD51C	MAPK13	CLDN15	KLF4	NQO1	MFSD10	IL4	LMAN2L	EBI3	REC8	CORIN	RFX4
CDK1	EFCAB11	APOBEC3	NID1	HSF2BP	IMPDH1	LBR	KCTD10	CCL3	SEMA6B	PLAG1	SHH	EPS8L1	PHLDA1
MTFR2	IFI27L2B	BRCA1	MTHFD2	CD36	BRD8	DNAH2	AGPAT3	MAPK7	RND2	IL7R	GNMT	ACTN3	ACSL6
HMMR	ACOT3	E2F2	ADAMTS4	BCAM	EFNB3	TBL2	DPP9	RARG	CSN3	GSTM3	KCNN1	A530013C23RIK	LPIN1
PRR11	CXCL14	CHTF18	APLP1	RELB	STAT3	KIT	RAMP2	SYNC	AKR1B3	SPIC	ARRDC2	PDK1	MAP2K6
AURKB	CENPK	E2F7	POLA1	APOC2	MAP3K20	GMNN	GRAMD1A	TMEM79	SIPA1L2	CTSE	CYP2C29	IHH	NR1D1
TOP2A	ANXA8	RRM2	GPRC5B	ELF3	ETV1	P3H4	TULP3	TBX21	LTBP2	HDAC9	LIPE	TTC25	CYP46A1
POLE2	SYBU	GRHL1	SPIRE2	CACNB3	CLCN5	VWA7	TCIRG1	NRIP2	MOV10	HSPB1	CAR11	CRYBG2	CNMD
MXD3	A1BG	USP43	STEAP4	IER3	CORO1C	4930432K21RIK	SEPT7	SMO	PPARD	RASA4	GRIK5	CHRNE	DCT
DIAPH3	CDKN1A	SERPINA3N	ENKD1	CYP17A1	SLBP	LNPK	NACC1	CHORDC1	ANGPTL4	CCN4	CD79A	ADAM28	FAM83F
PBK	PI16	CDCA7L	ITGA2	HAS1	NES	CBX5	SLC1A5	FOLR1	PDXK-PS	NR1I3	COL5A3	C4A	CSAD
ESCO2	SPINK1	AKR1C18	STEAP1	PDE1C	PAFAH1B3	WNT2	SPA17	GRIK3	INSIG2	ATP7B	KIFC2	TTBK1	SULT1C2
SHCBP1	LOXL4	CENPP	LONRF3	CNN2	IL27RA	KLHL3	EMD	CD3G	CALR	DERL3	GPX6	SERTAD4	CD4
RACGAP1	NPAS2	GOLM1	CNTNAP1	CD244A	DDX39	PIEZO1	PAXIP1	SPI1	MMD	RDM1	CCL24	MPP2	DUSP1
CDCA3	MARCO	TRIP13	ATAD5	NDRG1	RANBP1	DLL1	METRN	NAPSA	SGCE	ASZ1	MLXIPL	AFMID	KEG1
SGO1	APCS	CEP72	ETV4	HMOX1	GATA6	ALDH1A3	ARMC6	PSPN	CHD5	MCOLN2	FCER2A	JPH2	PDE6C
NDC80	IL1RN	DEPDC1B	KPNA2	ATP4A	RCN1	STEAP2	HLTF	LCP2	POLR2A	CARD14	CYP2A5	CPSF4L	PITX3
CDCA5	TTC39A	SKA3	WNT9B	MMP8	1700037C18RIK	C1QTNF1	SNRPD1	EPDR1	UBQLN1	CLEC4F	HYI	AOC3	CLEC3B
KIF20B	PDPN	ATAD2	PSMC3IP	TNFSF14	CRIP2	ADA	TCHP	TMEM39A	POR	HOXA2	MVD	CABCOCO1	GM4956
CEP55	PTPRU	GTSE1	PDK4	ITGAE	VARS	MYBL2	TGFB1	EFNA2	IGF1R	SLAMF6	RAB25	ARID5B	TMEFF2
MYBL1	SULT1E1	DSCC1	FBXO5	PRG4	HSPA1L	INTS2	GTF2F1	SLC2A3	MRVI1	CD48	HDAC5	PCSK4	RGS16
MCM6	ATP2B2	MCM4	TUBE1	FBLIM1	MSH5	TRIM37	CSE1L	GRK5	EPHB3	CLPX	SPATC1L	GAMT	COQ8A
CENPF	CCDC120	BTG3	APAF1	SUSD2	DDAH2	YBX2	BAZ1B	HCK	DNASE1	CLTRN	APOL7A	SLC22A4	UPP2
NEK2	FGL1	CHAF1B	MDM1	CRIP1	LSM2	SLFN3	JAG2	FKBP11	GGT1	GZMB	PSEN2	HORMAD2	CAR1
NUF2	CENPN	TUBA1B	IGFBP1	ITIH3	TINF2	CEP57L1	TOP3A	CRHR2	FBLN1	TUBB1	ACAA1B	ABCC3	CAR3
LCN2	NNMT	POC1A	ADCY1	SLC4A1	ANKRD26	CRYBG1	IL17RA	CYP4F18	EPHA2	WT1	ZFP296	PER1	CHRNA4
NUSAP1	IGDCC4	PKMYT1	SMTN	APRT	NCAPH2	TMPO	LAMB1	FOSB	RUNX1T1	FOXRED2	UBXN11	ESRRB	ACSS2
RAD51	RNF225	CENPQ	SKA2	ZFP184	FXYD5	CEP290	AP2A2	CROT	CASQ1	HNF4G	EHF	HHIPL1	SUCNR1
KNL1	SLC41A2	SPDEF	CEP112	ATP1A4	PLCD1	AHI1	PRKAR2B	IKBKG	STX1A	PNPLA5	ELMO3	IRF4	MME
KNSTRN	NEU3	KIFC5B	JPT1	HAPLN4	KDELR3	CRY1	CDKN1B	NKG7	CPT1C	CCL9	CLIC3	BARX1	HCN3
BUB1	DNAJC12	MYO7B	CTC1	FZD3	TJAP1	HCN2	PAFAH1B2	ARID3B	TWIST2	SYNE4	CYP2J9	HEXB	BDH2
TPX2	LRG1	INCENP	PLEK2	FHL2	MLKL	LTC4S	BCL2L12	LY9	1700008O03RIK	CCN2	AGER	HMGCR	EXTL1
FAM83D	NODAL	HELLS	ACOT2	1700109H08RIK	ALDH1A2	BTG2	CYTH2	ADGRE1	FUT1	HKDC1	PRRT1	BMP4	PER3
ECT2	ALDH3B3	ARHGAP19	AMN	RELT	PEA15A	TUBD1	GLG1	MATK	BMP7	DDIT4	RXRG	GALNT15	AACS
CCNA2	DUSP8	PRIM1	HAPLN1	DYNLL1	ST3GAL1	PPM1D	TIMM50	CD44	SYN2	PTPRR	HSD11B1	SEMA3G	GNGT1
IQGAP3	3930402G23RIK	NPTX1	DNAJC9	TMEM86A	CMC2	SLC7A15	DUSP3	PRLR	MRTFB	DDC	ALDOC	MYC	LMOD2
DEPDC1A	CHIL3	PLK4	BORA	EYA4	NOL3	LRATD1	DDR1	SLC1A3	G0S2	WIF1	PLTP	FBXO32	BHLHE41
KIF2C	INAVA	SGO2A	TNFRSF10B	ADAM19	LAMA5	ITGB3	HOMER3	TMOD4	ALDH3A2	ALDH1L2	CYB5R3	TEF	SRGAP3
RAD54L	2010003K11RIK	TM4SF20	OSMR	SPTBN4	ANP32E	CPD	CP	CD247	GRID2IP	STC2	WFDC15B	NCAM2	CLEC2H
CYP4A14	GUCY2C	WNT10A	MTBP	MOGAT1	1700016C15RIK	DNAAF2	MAST2	ANKRD13D	PLIN5	JADE2	SHROOM1	EAF2	SULT2A8
STMN1	FAM25C	BARD1	RHPN1	SLC9A5	DYRK3	MTR	NOB1	NECTIN4	CACYBP	ITGB4	DNAH11	ACHE	CYP2B10
CDCA8	PALB2	SERPINB8	CCDC14	GALNS	PHF21B	POC5	RUVBL2	NEURL1A	ANKRD52	SLC6A4	ETNPPL	CLIC5	SYT3
KNTC1	SLC16A5	PKP1	RFC4	NPDC1	DBNDD2	ELOVL7	BAX	CYBA	KIF1A	TMIGD1	HSD17B1	CRIP3	AQP8
RAD51AP1	SYT12	UBE2T	MIS18A	GADD45B	MYO1C	DHFR	FANCL	SNAI3	DNAJB9	COCH	TLCD1	GUCA1B	ANGPT2
DDIAS	UPK1B	MASTL	RTTN	LBP	PMP22	FAM107A	CACNA1B	HAP1	CNKSR3	SPTB	TRAF3IP2	TREML1	NUDT7
KIF22	ARMCX4	SAPCD2	TNFRSF12A	SULF1	SEPT8	PLPP1	TRMT10A	SLC44A4	GATA5	PAPLN	CFAP54	ARHGAP28	USP2
PLK1	COX6B2	KIF18A	PAQR4	RAB11FIP4	FNDC8	NUP155	DNAJB11	TSSK4	CASTOR2	MEG3	HAL	DNASE1L2	CISH
MKI67	CYP3A44	CCDC34	POLH	ZFP334	PELP1	HAUS4	AQP1	POU2F2	WNT11	ID4	SOCS2	SVIL	KCNK10
CENPI	ARNTL	CDC25B	SIK1	RHBDL3	YWHAH	OXCT1	PGF	CD163	CELSR1	OGN	TCP11L2	SLC4A9	DSG1C
MT2	S100A8	AURKA	MYOM1	PTGIS	SCN1B	RAD21	SRPK1	GNAT2	KCNQ2	FAM217A	PAH	MAPK4	THRSP
MT1	S100A9	DSN1	CEP192	GDF9	CALM3	RANGAP1	HNRNPA2B1	2610028H24RIK	MPPED2	RPP40	SYCP3	GNA14	TWIST1
GINS2	PRELID2	RBL1	LMNB1	GPX3	UBB	C1QTNF6	CCDC130	TRPM5	ACOT8	SEMA4D	IGFBP3	PELI3	UGT2B1
CHEK1	PRTN3	4930579G24RIK	PSAT1	SLC13A3	SLC6A8	CEP97	KLF5	TRPM2	SLC12A5	GADD45G	SREBF1	GSTO2	MACROD1
CCNB2	CAPN11	SMC2	FAM111A	MMP7	RSPO3	CMSS1	PLEKHA8	MPO	HSPB9	ADCY2	CMPK2	FASN	H2-AA
TROAP	DMKN	ATP8B5	FEN1	TNFSFM13	DCBLD1	ZFP641	MSH6	NUAK2	EYA2	4930452B06RIK	RSAD2	4933402D24RIK	SCD1
CIP2A	RETNLA	CDKN2C	IL33	SLC22A5	SGK1	DHH	MSH4	KIF19A	YPEL2	RGR	SLC26A4	PTPRN	HTRA4
ASPM	DNAIC1	ORC1	CYP2C39	CCL6	IKBIP	SLC4A8	CTR9	ZMYND10	CHD3	MSS51	SNTG2	DPT	HSD3B5
FANCD2	ORM2	CYP4A31	KATNAL2	SLC25A22	MYB	ZFP54	AMPD3	TNFRSF13B	KDM6B	CCDC198	POLG2	ASTN1	GASK1A
POLQ	MSLN	STIL	TYMS	AIG1	ELANE	MEP1A	REEP5	TEX14	SP2	AMER2	P2RX1	USH2A	FOXQ1
KIF4	CHIL1	XRCC2	MAP4K4	HEBP2	CSRP2	FKBP5	TPR	PHLDA2	LHX9	SLC25A30	ACLY	ESRRG	CIART
TRIM59	VXN	SLC30A3	STK17B	FAM184A	STK10	SPATA24	PRSS16	GLTP	COPS6	ADAMDEC1	STAT5B	MCM10	ELOVL3
NEURL1B	CCND1	CGREF1	PRIM2	FABP7	RHBDF1	IMPA2	GGT5	RPA3	ARID3A	GFRA2	ADAM11	ACVR1C	9130409I23RIK
EDA2R	REN1	CENPA	PASK	DRAM1	XPO1	SETBP1	CBFA2T3	GFOD2	LYST	GRHL2	PYGL	GSN	GBP2B
LY6D	SEPT5	CDC7	MPZL1	SRGAP1	SGCD	DNTT	RBM14	MCEMP1	NTS	MATN2	SLC10A1	MORN5	PKLR
BC030867	GSTA1	UNG	PKN3	GFPT2	CDKN2AIPNL	GFRA1	TSPAN31	TCTEX1D2	PDE7B	TTLL8	ASB2	CCDC183	GPR12
NCAPH	KBTBD6	MAD2L1	HAT1	MYL7	GALNT10	ENTPD7	SAAL1	BLK	NUAK1	LY6F	AKR1C21	P2RX3	SERPINA5
PARPBP		SLC41A3	PRRG4	AEBP1	SDC1	ATP10A	SULF2	CSF1	EIF4EBP2	LY6C2	FDFT1	ELF5	SERPINA12
FIGNL1		A2M	WDR76	KLHL29	TRIB2	CDK2	CLIC1	STC1	IRAK3	TMEM45A	CARMIL1	FGF7	GCK
MELK		EMP1	TYRO3	RNF144A	MRC2	PMEL	DENND2C	CYBB	SHC2	ASIC1	ATG10	CHAC1	ESM1
SKA1		RAD18	PCNA	RASL10B	NUP85	PIDD1	HNRNPH1	PCOLCE2	ZFP607A	TULP2	NR1D2	CCN5	NREP
9530077C05RIK		DPF1	MCM8	SLC13A5	LRRC59	TSPAN4	ABHD8	CD83	PATZ1	RHEBL1	CRYL1	SMAD9	ZC3H6
KIF15		FGF21	GINS1	WSCD1	TMEM107	PODXL	PRPF31	ACE2	OGDH	TIAM2	CACNA2D3	VEPH1	SLC15A5
ANLN		RRM1	E2F1	PIK3R5	MYH10	ATRIP	ELK3	LPL	PCTP	CLDN6	TSC22D1	CASQ2	SERPINB1A
TACC3		CENPU	IFT80	KRT19	NOVA1	IL1R1	UBE2G2	GNRH1	NRCAM	FLYWCH2	FITM1	CHRNB2	COL27A1
TEDC1		GINS3	SASS6	PLCD3	NIN	EPHA4	NAV1	SQSTM1	ARSG	SLC25A27	EMC9	RRH	TEDDM2
DTL		HP	CKS1B	RDH12	VRK1	NUCKS1	KCNQ1	FCRLS	FAM20A	CALCR	ROPN1L	THBS3	1700001C19RIK
DLGAP5		BMPER	CCNE2	UNC79	TDP1	SPTA1	KCND1	CD5L	MBOAT2	TFF3	DNAH5	RORC	FLACC1
CDKN3		CCSAP	PTGR1	FOS	RPS6KA5	ABI2	IFRD2	FAM184B	POMC	GRM8	SYNGR1	CYP7A1	ANGPTL8
CKAP2		LYSMD2	KIF24	DEGS2	LGMN	AK1	RASSF1	FCGR1	ACE	AQP4	ENDOU	TAL2	SORL1
TTK		MNS1	FANCG	HSP90AA1	NEDD9	1700007K13RIK	RAVER1	NCF1	MMP28	ZFP521	CIITA	SH3GL2	RD3
PRC1		KIF23	GPX7	ASPN	DEK	PHF19	OPTC	LRRC27	GRIN2C	RAB27B	ADCK5	SLC6A9	CES2B
EME1		ZWILCH	NDC1	FBP2	SERPINB9B	LY75	METTL16	STK32C	FBF1	SLC27A6	TYMP	PODN	PPP1R3G
FANCI		TRAIP	MUTYH	VCAN	PDLIM7	CERS6	TNFRSF22	CD34	TEN1	CSF1R	MPV17L	EPHB2	TRHDE
NEIL3		FANCA	MAP3K6	EMB	SLC6A19	PTGFRN	THG1L	IL13RA1	DLX4	MS4A7	GBE1	CYP4B1	LRRC15
EXO1		SMC4	HGF	FST	SLF1	SYPL2	BRMS1L	CACNB4	PFAS	MS4A4C	SLC7A4	PADI2	SUGCT
BUB1B		LRR1	RPA2	LDB3	RASGRF2	CASP8AP2	TMEM167	TNS4	CCDC103	APBA1	AIFM3	ARHGEF16	CES2A
PCLAF		CENPT	FOSL2	RNASE10	TXNDC16	PSIP1	ETV5	CD40	STON2	CYP2C55	CELA1	MORN1	HAMP2
PIF1		INHBB	EMILIN1	ITIH4	SAMD4	CTPS	SNX31	MMP9	NPAS3	CYP2C40	AMHR2	GABRD	GSTA2
ARHGAP11A		SLC9A7	PDGFRA	GDF10	RNASEH2B	NASP	CAD	SGK2	LRRC9	SLIT1	SNCG	TTLL10	SERPINA9
CCNB1		WDHD1	SLC10A6	WNT5A	EDNRB	NOS3	RNF168	CYTH4	CCDC88C	COL17A1	FRS3	HGFAC	MUP5
KIF14		RMI2	RFC5	SCARA5	TBC1D31	FAM126A	SRP19	KSR1	KIF26A	CD7	PRKN	OSBPL3	CELA2A
NCAPG2		NCAPD2	DCK	TGM1	L3MBTL2	LIMK1	UNKL	ABI3	KIF13A	PDE6G	RSPH9	BHLHE40	NFE2
CLSPN		SAA3	CHEK2	RIPK3	NPTXR	TRIM24	HMGB3	ADORA2B	PXDC1	HSD17B6	TFF2	CSRP3	RGS3
CDC25C		SYNGR4	EZH2	RPAP3	CBY1	ABCC9	UBL4A	PCGF2	ECI2	IFITM5	PRSS41	TNNI2	DBP
CENPE		MTHFD1L	MCM7	LITAF	FAM118A	TIMP4	XK	TBX3	CDK20	ASL	MEIOB	3830403N18RIK	CES4A
ANKLE1		BC055324	TUBA8	LYNX1	SH3BP1	MBD4	PRUNE1	IKZF1	PDE4D	TK1	ABCG8	DCX	CYP2C70
TICRR		PHLDA3	CCDC77	MIOX	MYH9	APBA2	TAB2	CD68	RNF180	SLC28A1	TSLP	XLR4C	PCLO
MIS18BP1		MCM3	GOLT1B	RETNLG	ZFP251	SULT1A1	EPS8	LSP1	GLUD1	PPP1R42	LIMS2	BMX	PPP1R1B
CKAP2L		H1F10	ZIK1	BOC	LMF2	MORC4	ADSS	UNC45B	NID2	CLK1	LAMA3	IRF2	CFD
CDCA2		CENPH	BLM	ST6GAL1	CCDC80	DCTD	IL17RB	HEATR9	ENOX1	2010300C02RIK	TTC39C	IRX3	CES1E
ERCC6L		MMS22L	CHRDL2	SLC15A2	DGCR8	GALNT7	LNX2	CCL4	CHRNA2	PLCD4	SPRY4	SLC12A3	CES3B
KIF18B		FANCB	TACC2	CBR3	B4GALT4	EDNRA	NUP50	DNAH1	GPC5	IGFBP5	CABYR	MAST3	ERBB4
ARHGEF39		ZFP473	CDR2	SCN8A	FSTL1	MFAP3L	TTLL12	PTGER1	DNAJC3	SLC45A3	CD74	PDE4C	MIR122
SAA2		INKA2	ERI2	NR4A1	TMEM41A	CRNDE	ETAA1	HEY2	NGDN	IFI202B	ASRGL1	TMEM231	CYP4A12A
ESPL1		HASPIN	RBMX2	KRT7	DONSON	MRE11A	NT5C3B	TNFAIP3	CARMIL3	SPATA17	MS4A1	CAPN9	MUP21
NSL1		TCF19	IL13RA2	KRT18	CERS5	DDX25	MED24	PKIB	TARS	SLC30A10	TM7SF2	ST14	SELENBP2
PSRC1		HYLS1	PLXNA3	SLC10A2	RFC2	1700017B05RIK	RARB	HSF2	RETREG1	CR2	PAPSS2	KCNJ5	ADGRV1
SPDL1		ZGRF1	APOA4	SERINC2	TNFRSF21	PYGB	SUZ12	P4HA1	POP1	CUBN	OVOL1	FEZ1	PROK1
SAA1		6030498E09RIK	TREH	TMEM176A	NFKBIE	TTF2	ELMO2	SNRPF	WNT7B	ITGA8	VLDLR	ME1	MUP14
AUNIP		TNFAIP6	RAB27A	PRPH	CYP39A1	IGF2BP2	TTPAL	BTBD11	SMC1B	DNM1	PDCD4	COLGALT2	MUP11
KIFC1		HMGB2	FAM81A	AGPAT4	PPIL1	PIWIL2	SERINC3	HSP90B1	HES1	NOTCH1	RAB40B	ALAS1	CIB3
LOCKD		MTNR1A	CLN6	SLC22A3	CPNE5	ATP7A	PGS1	PLEK	CBLB	DHRS9	FN3K	PPP1R9A	ARRDC3
		LIG1	NRG4	1700010I14RIK	JPT2	STON1	WFDC2	DOCK2	MORC1	ALKBH3OS1	SCD3	1700088E04RIK	GM10804
		CCDC18	CGAS	TREM2	POT1B	CCP110	SLC12A4	GABRP	CD200	CHST1	KAZALD1	LSS	MUP20
		RAD51B	CDC25A	RSPH1	MAP3K8	ATM	UCHL5	PRMT2	P2RX6	MDK	ALAS2	TNXB	MUP19
		NRM	TOPBP1	SLC37A1	SPIRE1	GPC1	SRSF1	MRNIP	YPEL1	HYPK	IL23A	SPATA2L	MUP18
		CEND1	NUP93	EMILIN2	PCSK5	MYO5A	TRPV2	CLK4	LMLN	IL1B	CYP2E1	FOXN3	MUP16
		ACNAT2	TMPRSS7	SLC3A1	RPP30	CDHR2	G3BP1	PDLIM4	THPO	NECAB3	IRF7	PPARGC1B	MUP1
		PLPPR1	BC016579	C3	RAD9A	NCAPD3	ATOX1	CDKL3	EHHADH	TRPC3	NAT1	MAP9	MUP9
		NIPAL1	ADAMTS15	TMEM173	PITPNM1	DCBLD2	SPARC	ITK	HRG	LEF1	ARHGEF9	TSPOAP1	MUP8
		CENPM	REEP4	MZB1	EFEMP2	XRRA1	CBX1	HAVCR2	MASP1	GLRB	DHTKD1	POF1B	MUP2
		SLFN9	UCP2	LOX	ALYREF	PDZRN3	SMYD4	UPP1	SETD4	OAZ3	TMEM14A	EEF2K	MUP6
		REG3B	ADRA2A	ME2	SCD2	TGFBI	P4HA2	MYO1G	ITSN1	THEM5	GSTA3	PPP1R32	MUP-PS16
		CFAP44	RECQL4	ANXA1	FGD1	PCDH17	ARRB1	PDIA6	SMARCD1	SDR16C5	CDK15	MYO1D	GM2788
		OIP5	YPEL4	CHKA	MAGED2	DDX11	SART3	PIK3CG	GPD1	ATP6V0D2	CHST10	L3MBTL1	GM12718
		CENPS	CCDC15	CNIH2	AGAP2	TMTC2	SLC35B4	TSPAN13	PCDHGC4	CLCA1	CYP27A1	KISS1R	GM15408
		THBD	BRIP1	ALDH18A1	HSPA4L	FAM110C	AHR	ID2	IGFBP6	KIF12	VIL1	1810046K07RIK	GM12248
		CENPW	SEMA3F	AFAP1L2	SLCO3A1	LUM	MAP1S	CACNG1	LNPEP	CNTFR	PECR	SLC26A8	E230016M11RIK
		RAD54B	DGKH	SLC16A3	SEC61A2	AGO2	TMEM129	LUC7L3	GM20517	ERMAP	EFHD1	NPY1R	HECTD2OS
		SERPINA3I	PDK3	SECTM1A	UNC5A	SSX2IP	DDX39B	SLC35B1	CYP1B1	MFSD2A	RGS1	FZD8	NAT8F7
		2810408I11RIK	G2E3	SFXN3	SNCA	PLCH1	ARHGEF25	DLG4	CACNA1H	PLK3	PIGR	FOXA2	LOC115486954
		DYNLT1F	MID1	PADI4	TERF1	RIMS2	RCN3	MAP3K14	ECI1	LURAP1	RASSF5	AFF3	MUP13
		9430037G07RIK	LIN54	CD63	PAQR8	ARID5A	AKT3	ARG2	MCFD2	KIF17	MR1	MYCN	A930033H14RIK
		9330159M07RIK	HAUS8	ADAM8	RAPH1	VOPP1	SLC35E1	TSHZ3	TEKT4	RGS12	PLXNA2	DZANK1	GBP11
		4930558J18RIK	ALG8	RBFOX3	NOP58	MAT1A	ESR1	TGFB3	PKDCC	RHOH	MEIG1	KLF10	CYP2C53-PS
		2700099C18RIK	FAM122B	RHBDL1	TEX30	CNBD2	LRP11	EVL	THADA	EPHA5	SLC4A10	FAM13A	A630076J17RIK
			ZRANB3	FBXL16	SEMA4C	CDON	WASF1	TNFAIP2	SYT4	STAP1	NEB	A4GNT	MUP12
			AAAS	CD28	CNOT9	SPON1	GTF3C6	AOAH	CYP4F41-PS	SPARCL1	HNMT	PLEKHG6	MUP15
			TUBB4B	COL5A2	PTMA	MYBPC2	SEPT10	EDN1	CYP21A1	PPBP	PAX6	ENPP6	MUP17
			NETO2	IL18R1	DTYMK	RTEL1	LIMS1	LY86	GFRA3	EREG	CAT	GPR162	CYP2D12
			WDR62	IL1R2	NFASC	NUP205	DCN	SNRNP48	MAL2	CCNG2	DLL4	OSBPL7	4732419C18RIK
			ZCWPW1	SLC23A3	CYB5R1	ATF7IP2	ATP2B1	SYK	CIDEA	SDS	SPINT1	SAXO2	1700028E10RIK
			ADAM32	ACMSD	LAMC1	MEGF9	DUSP6	AHRR	NEDD4L	ANKRD61	GPCPD1	AKR1D1	GBP10
			HAUS6	CSRP1	DESI2	FLICR	EPB41L2	CD180	FADS2	ADCYAP1R1	FAHD2A	SHANK1	GM35986
			CNTLN	KIF26B	FH1	SPOUT1	NEDD1	NAIP1	TMEM138	IGF2BP3	SRMS	TNFSF10	GM34333
			ANO2	SLAMF9	TAGLN2	EVA1C	ENPP3	ARHGEF28	MS4A4D	SLC13A4	SLC2A2	TSPAN10	GM20752
			POLD1	ATF3	ATP1B1	SUCO	IFNGR1	F2RL1	CDK2AP2	1700003E16RIK	HAO2	LRRC17
			PBX3	LAMB3	SUV39H2	CKAP5	CEP83	PDE8B	SLC29A2	GP9	REG4	BMF
			CLDND2	FMO3	RGS5	RANBP17	CCAR1	PARP8	CYP26A1	LAG3	LRRC39	TRIM7
			ABHD2	CRAT	CENPL	SH3PXD2B	SRGN	GPX8	PLCE1	CLEC4D	OLFM3	5330417C22RIK
			SUV39H1	FRZB	VIM	SIAH1B	MACROH2A2	BC067074	LCOR	KLRK1	CYP2U1	SPNS2
			FNDC3B	ITGA4	IL2RA	GPR161	PPA1	RNASE6	BNC1	KLRD1	IFI44	CEP126
			CDK5RAP2	CYBRD1	PDSS1	SNTB2	AVPR1A	GPR65	PYCR1	KLRC1	EFNA3	IGSF21
			PPL	ELL3	COL5A1	OSBPL6	LGR5	EEF1AKMT1	ANKRD2	KLRA2	RWDD3	GM11992
			ZDHHC2	MAP1A	LHX6	RADX	MDM2	ATP8A2	CNNM1	MGP	UOX	PDE9A
			TIMELESS	EHD4	PSD4	ASB4	DIP2A	EPSTI1	MMP19	SLCO1A4	DDAH1	PAQR6
			CD209C	MAL	NUP35	LOR	FZR1	RGCC	NAB2	FAR2	FMN2	SYT15
			1700012D01RIK	SLC52A3	DNAJC10	HILPDA	COL6A2	DMTN	INHBC	EFCAB12	ANGPTL3	TSSK1
			CCHCR1	ZBP1	MYEF2	ZMYM1	TXNRD1	DOK2	GLI1	FAM189A1	PDZK1IP1	CRX
			BRCA2	NKAIN4	DUT	A730008H23RIK	D10WSU102E	ACOD1	DDIT3	CHRNA7	ZFP362	NLRP5-PS
			RBBP8	OCSTAMP	FBN1	UBTD2	SUMO3	FYB	RNF165	MESP2	TEKT2	SLCO1A1
			SPECC1	DCLK1	FRMD5	POLN	LYRM7	AJUBA	EPS8L2	PGPEP1L	SYTL1	ACACB
			HIRIP3	PFN2	SLX4IP	ADRB2	CDC34	SLC7A8	CPEB1	RASGRP4	SLC2A5	CPA6
			OSCP1	S100A11	LTK	IFITM10	SPTBN1	PSMB5	HADHA	CHP2	KCNIP4	MYO15
			TMEM108	CREB3L4	HDC	FUT10	CCNG1	CTNND2	PDIA4	WEE1	KHK	TRIM72
			NEMP2	GASK1B	MGME1	TRARG1	NUDCD2	ANGPT1	ECRG4	ZFP300	NSUN7	ONECUT1
			SYNPO	PLA2G12A	CD93	BEX3	HNRNPAB	SLA	TMEM169	IGSF1	SULT1B1	WDR63
			LRRN4	FGA	SDCBP2	SCN4B	CNOT6	CACNA1I	SPATA3	ITM2A	2010109A12RIK	CCDC63
			ADAMTS3	ALPK1	FAM110A	HMGA1	RAD50	PARVG	SERPINE2	COL4A5	CXCL9	DISC1
			CFAP43	PTGFR	TPD52	ATP10D	EIF4ENIF1	TTLL1	IQCA	CHRDL1	RHOF	ECM2
			FBXO48	ADAM15	LRRCC1	DDIT4L	ZNHIT3	VDR	TNNT2	SFRP1	TMEM116	EFCAB9
			E2F8	SH2D2A	GSS	DUSP18	FAM49A	NCKAP1L	FCAMR	LRP2BP	ACAD10	BMERB1
			CKAP4	ENHO	ZMAT3	LRRC49	SMC6	PDE1B	CFAP45	LPAR2	MTUS2	BC024139
			ADAMTS12	UNC13B	TNIK	SACS	CENPO	BCL6	ADCY10	TBX20	IRF5	LINGO4
			RASD1	CAR9	PLD1	FAM171B	PXDN	PLAAT1	BMI1	TMPRSS4	SSPO	CAGE1
			H2AFX	GLIPR2	EXOSC8	CXCR1	CDC27	MEFV	RALGDS	CD3D	HPGDS	ZFP36
			GJA4	PLIN2	TM4SF4	CCNB1-PS	MAP3K3	LY6E	HSPA5	OLFM2	NAT8	ARHGEF37
			GJA1	SGIP1	OLFML3	RTBDN	PECAM1	RABL2	LRP2	GSTA4	ALDH1L1	INSIG1
			CAMK2N2	B4GALT2	NGF	KLHL11	SLC25A19	CD96	CREB3L1	RBP2	CLEC4B1	LRTM1
			GEN1	GALE	VANGL1	RNF24	TRIM47	GCSAM	USP50	CLDN18	CD69	MCMDC2
			NUP107	SEMA3C	GPSM2	PDP1	CAMKK1	CD200R1	ANGPT4	ACPP	CLEC2D	HRK
			JAM2	CSF3R	RAB13	KMT5A	RHBDF2	B3GNT5	DNMT3B	IP6K2	PTPRO	SLITRK4
			TCEAL5	RSPO1	TRIM2	BRD8DC	CYGB	SDF2L1	STMN2	OAS2	PIANP	PPP1R3B
			SKP2	MTHFR	SNX7	H1F1	MXRA7	MAATS1	RTF2	NLRP3	SCNN1A	GPR141B
			CKLF	BST1	GSTCD	BEX1	DHRS13	ABCC5	PHACTR3	FOLR2	CLEC2I	TSSK6
			ADAM12	SORCS2	LMNA	RTN4RL2	TIMM22	HCLS1	DOK5	CHRM1	SLC27A5	FCGBP
			PGM3	NSG1	PMF1	NUP160	RFLNB	SAMSN1	MMP24	SGPP2	NOVA2	SNED1
			LIN9	PLB1	TSPAN5	SPDYA	SNX11	ILDR1	NCEH1	ADGRE4	SIGLECG	GM4737
			UBE2S	SLC34A2	C9ORF72	KCNT2	NTN1	CD86	CCNA1	GAS7	NOX4	OMD
			CEP128	LNX1	ANP32B	PHGDH	TMEM101	PIGP	ETFDH	TBC1D4	CD22	GLI2
			MDC1	GPAT3	NANS	TG	EFTUD2	RCAN1	DCLRE1B	RNF125	DNAJB13	RANBP3L
			TUBB3	PLAC8	POLE3	MAT2A	PTPN21	RUNX1	SLC27A3	HSD17B3	MYH14	CCDC57
			NRG1	CRYBB3	UBAP2	CTHRC1	SPTLC2	4930415O20RIK	NUP210L	TAGAP	DGAT2	PKD1L3
			CYP26B1	CXCL1	DNAJC6	AFP	FUT8	CXCL13	PDGFC	MYO5C	PRSS8	FZD4
			CDC42EP5	MMP17	CACHD1	NAALADL1	PIGH	GZMA	TRP53INP1	MAP3K13	STX1B	GREM2
			SRRM4	ANXA3	ITGB3BP	FAM72A	SUSD6	REG2	DECR1	DNAH8	ACADSB	GPR171
			RAB44	RASAL1	USP1	CDCA7	PFKP	SLC38A1	EPHA7	RBM46	ANKS4B	MCHR1
			LRRC8B	RASL11A	MAP7D1	HMCN2	PPP4R4	EPB42	COL15A1	TSPAN8	PDILT	FOXC1
			RBM44	MEDAG	CASZ1	PAQR3	NET1	CRELD2	NR4A3	CBL	OTC	NETO1
			TMEM139	ASNS	TBC1D1	MOK	ENTPD5	TWF2	PAPPA	MYO15B	PLXNB3	MMP13
			NT5DC2	GPNMB	CENPC1	MED12L	VASH1	MX2	BSPRY	GBP8	ADRB3	TMEM150C
			CCNF	REG3G	RAN	NSD2	WARS	CLEC4N	B4GALT1	DYNLRB2	IDO2	GM11437
			ACOT1	ADAMTS9	PSPH	H1F5	CINP	HES7	TNFRSF8	PIK3IP1	MSMO1	KLHDC1
			WDR90	BCL2L14	KDM2B	ADAMTS14	TRAF3	PLA2G7	LRP8	CD207	MYLK3	SEC31B
			GM15441	ERP27	CIT	CASC4	XRCC3	SATB1	SLC2A1	GNA15	CES1F	DOCK8
			SPC24	CIDEC	FSCN1	SAMD5	GPR137B	CRISP2	CDA	RUBCNL	HERPUD1	MTCL1
			TTLL9	CD9	PCOLCE	LAYN	GLI3	FGD2	ALPL	CCL5	RAB3A	PCDH15
			GAS2L3	TEAD4	EXOC4	MYL4	SPIN1	TFF1	PTPN12	KCNE3	HSD17B2	UBE2QL1
			ZFP808	TTYH1	CALU	PRCP	SSR1	CBS	ADGRB2	LARS2	PBX4	PTPRT
			CERKL	TRPM1	CEP41	RUFY4	FANCC	EPB41L3	RHD	SSC5D	CAR7	RAB4B
			SELENOH	RAB30	TMEM176B	ZFP599	SLC25A48	RGS11	SEMA3A	TNNI3	CDH15	CBX7
			SERPINA3M	TMC5	HOXA1	JAZF1	LECT2	ACSBG3	ARHGEF19	ALDH1B1	BIRC3	SH3PXD2A
			TNNC1	NUCB2	CASP2	EGFEM1	AGTPBP1	MYO1F	PRKAG2	DCDC2A	KIRREL3	A930004D18RIK
			DYNLT1A	IL21R	EPHB6	ALMS1	SLC30A5	SLC39A7	ABCB1B	RIPOR2	FDX1	TMPRSS11E
			GM3604	ITGAM	KBTBD8	LOC115488214	POLK	COL11A2	RBP7	CCDC38	DIXDC1	9130230L23RIK
			CDKN2D	PDZD9	WDR54	LOC115490288	ZFYVE16	H2-OA	MAD2L2	SLC2A13	TEX12	PM20D2
			GM30173	HPX	APLF	USP51	FGF10	EPB41L4A	MIIP	P2RY12	BCO2	ZFP457
			AI506816	LHPP	TMEM43	CEP152	MAP3K1	AIF1	HTRA3	LCN8	LIPC	ANO5
				ST5	ZFP248	H3C1	RNASE4	LTB	NELFA	GREB1	ACSBG1	ZFP580
				SMARCA1	ARHGDIB	H3C2	EAF1	TNF	EIF2B4	ABCC12	CYP1A2	RTL6
				STK26	RECQL	H2BC11	GLT8D1	PSORS1C2	CXCL5	ARHGAP33	HCRTR2	IZUMO4
				PLP2	C2CD5	H3C3	XPO4	AP3S1	SHROOM3	ARHGEF26	ADAMTS7	PER2
				SLC38A5	CAND2	PEG12	ZC3H13	LVRN	P2RX2	APLN	CLSTN2	CNDP1
				FLNA	TNFRSF1A	TMEM200B	CLU	PPP2R2B	HSPH1	MYOM3	NMNAT3	TCIM
				ZFP185	FAAP24	HRCT1	ADAM7	SEC11C	PON3	ARHGAP10	DCLK3	CES1D
				AP1S2	IQGAP1	CEBPD	SLC39A14	PMAIP1	SSMEM1	GRHL3	NUDT16	SPATA45
				ATP11A	SEMA4B	6720489N17RIK	MED4	MBD1	STRA8	GALNT6	TRIB3	CACNB2
				GAS6	MFGE8	CEP76	DAB2	CD5	TGFA	CEP85	CASKIN1	4933430I17RIK
				COL4A1	AEN	ZCCHC3	RAI14	MS4A6B	NUP210	H2-DMB2	DNAH17	FAM57B
				PLAT	ANAPC15	PLXNC1	RAD1	MS4A6D	WNT7A	SLC25A43	PQLC1	KCP
				PLPP5	ARL6IP1	ZFP934	RNF19A	LPXN	WNT5B	CDKN1C	CCDC17	FDPS
				CX3CL1	MAZ	NYNRIN	YWHAZ	MS4A8A	ATF7IP	THEMIS2	PRSS29	IRX1
				TPM4	SEZ6L2	CNTD1	KHDRBS3	TMEM132A	ST8SIA1	AIM2	FOXJ1	MKX
				B3GNT3	NFATC2IP	HAUS5	FAM49B	SLC15A3	CRELD1	SLC9B2	HDAC11	BLNK
				JAK3	POLD3	ZFP970	PARVB	ALDH1A7	PGLYRP1	RAPGEFL1	SDR42E1	FNIP2
				BCO1	TEAD2	CCDC82	SLC38A2	STAMBPL1	SLC7A9	DLEC1	IFIT1	TMEM91
				1700030J22RIK	FBXL19	RPTOROS	RAPGEF3	FAS	LRFN1	GSTP2	CD300LD	ABCA14
				SLC7A6	REXO5	BRIP1OS	PMM1	ALDH3B1	CALCB	FAM50B	TLE2	COL23A1
				SMPD3	OAT	GM15663	SHISA9	CTSW	CALCA	PCP4L1	DIO1	LOC115489598
				TAGLN	FAM53B	APOLD1	GPAA1	FOSL1	NUPR1	GDF15	ART3	CD209B
				MCAM	ARHGEF6	GM5141	PLEC	EHBP1L1	TRAT1	RGS4	ACOT11	CYP2C54
				ANXA2	RBMX	2010016I18RIK	SCRIB	FERMT3	BCL7C	SUSD4	CEBPA	EFCC1
				COL12A1	VBP1	PEG10	PYCRL	TECTB	ARFIP2	PLN	NEIL2	GM4841
				PLOD2	MSN	FSBP	CYP11B2	MSR1	ILK	SLC35F1	AMH	CELSR2
				RWDD2A	OPHN1	GM26611	FOPNL	5430427O19RIK	MRGPRF	FSD2	PLK5	NLRP1A
				THSD7A	PBDC1	H3C8	NDE1	ACOT9	ANO1	WDR93	CAPS2	RGMA
				CCDC88A	SRPX2	2010310C07RIK	ARL6	MYO1A	FGF13	ADGRG6	UGT2A3	CITED4
				RNFT2	GLA	PCDHGC3	CRYBG3	AVIL	DUSP9	MMD2	SYT1	GM6313
				SLC16A1	CTPS2	C130083M11RIK	CPOX	DPYSL4	THSD1	LONRF1	ACSS3	CCL19
				CHPF	PIGA	GM19619	CCDC116	COX8B	CDH11	SDK1	LEAP2	C1QTNF9
				KBTBD12	MORF4L2		MELTF	SDC3	MT4	BAHCC1	GADD45A	CCNB1IP1
				KCTD17	COL4A2		IGSF11	IL6	MT3	CC2D2A	ARHGAP26	SNX29
				CRLF2	ERI1		TFRC	LY96	PLLP	GPR34	CPZ	9130019P16RIK
				QSOX1	SAP30		ARHGAP31	CCR1	TAF1C	IL7	EEPD1	XLR3B
				TLR13	ORC6		HSPBAP1	HK3	HAS3	TLR8	CCDC148	TRIM40
				PLA2G4C	MMP2		TRA2B	CASP12	MPZL2	RUNDC3B	CCN3	FBXO36
				FGG	6430548M08RIK		D16ERTD472E	CASP1	HYOU1	CYP2B9	HHAT	WDFY1
				ZDHHC15	COTL1		ROBO1	SOX17	THSD4	IQSEC3	ASPG	APOL7D
				FLVCR2	MPHOSPH6		ADAMTS1	MSC	TSPAN3	ULK4	IFI206	BC048644
				EVPL	PANX1		ETS2	IKZF2	CSPG5	SHLD2	DDX60	TNFAIP8L3
				INPP5J	PHIP		ARL13B	ICOS	FBXL2	RRAGB	CCR7	MAFB
				DBN1	PKM		PROS1	ZAP70	SCN5A	MYRIP	FAM210A	6430550D23RIK
				DUSP5	TPM1		RIPPLY3	B3GAT2	RAB6B	MACC1	CAMK4	FIBIN
				PARM1	PLSCR1		FMNL3	SLC11A1	SLC25A20	CILP	SLAMF7	LOC115489782
				HPSE	TIPIN		DIP2B	CXCR2	SBSPON	LGALSL	TLCD2	PPIL6
				NFKBIZ	NT5E		SLC11A2	TUBA4A	ABTB2	FCMR	BPHL	CFAP74
				CCL7	GPR19		TARBP2	SPEG	STK36	SHCBP1L	MFSD4B1	PRKCG
				CCL2	FHL3		FABP2	TNFRSF11A	ASB13	HPDL	NLRP6	TLR5
				TMEM98	LAMA1		CEP89	GPR39	CMIP	IFI209	PTK6	XIRP1
				ACTA2	SRXN1		GTF2IRD1	TMEM163	PTPN13	TEDDM1B	NIPAL2	NAT8F6
				CERK	ABHD10		P3H3	RGS2	HID1	LRIT2	BMP6	GM13420
				CHST4	DIS3		ZFP605	DBI	CHST11	TRIL	MYCBPAP	GM5640
				PKNOX2	FBXL8		SLC17A9	PTPRC	MTRR	MDGA1	IL18	COLCA2
				TM6SF2	USP37		IGF2R	NCF2	LRRN1	MMP3	TSPYL4	LOC102638047
				P2RY14	FNTB		PDE10A	IFI211	TTYH2	TOX3	CYP7B1	GM715
				WTIP	ARMCX2		THBS2	SELL	MFRP	PRR33	RSPH4A	CYP2J8
				MEGF11	ARMCX1		ENPP4	BATF3	MAST4	FMN1	2210406O10RIK	GM12618
				NDRG4	RFWD3		PTK7	IRF6	PCDH11X	TAFA2	CCDC151	5830444B04RIK
				RAP2B	AW554918		NFYA	ENKUR	B3GALT1	LMOD3	BAAT	4930565N06RIK
				LRFN3	NRXN2		SMCHD1	PTER	GRIP1	PRSS53	OXLD1	TMEM240
				FREM2	DYSF		EHD3	NEK6	NRIP3	SNHG11	DNAJC28	TOMM6OS
				CAVIN3	FGB		MAN2A1	APBB1IP	ANO8	CCDC89	GALNT12	GM11520
				PRF1	GUCY1A1		SRSF7	FAM129B	RTKN	TIGD3	NEURL2	SLC13A2OS
				SPON2	RFC3		TWSG1	GBGT1	TMEM106A	TENT5C	GPR37	GM13807
				ICAM1	LSM3		NRXN1	CYTIP	HRH2	A730020M07RIK	CITED2	GM16230
				SERPINE1	GAS2L1		PREPL	PSMD14	RRP12	TLR7	CBLN3	4930442L01RIK
				VNN1	LOXL2		MLST8	CARD9	ZC4H2	ZBTB7C	LARGE2	2310005A03RIK
				TNFRSF23	LIF		PIGF	FCNA	1700020L24RIK	DEFB1	ABCG5	KANTR
				CPE	CASKIN2		MSH2	TMEM141	EGLN3	1700056E22RIK	APOC1	GM16291
				EGR2	UACA		SPSB3	UAP1L1	SHC4	ZFP423	MADD	MIR1945
				PCDH18	GJC1		POLR2D	CHRNA1	NAT14	PCDHB4	CATSPERD	LOC102631993
				GALNT18	2700049A03RIK		SLC39A6	SLC28A2	ROR1	CALHM6	MGL2	EIF4EBP3
				GMDS	GRN		CDC23	GFRA4	1810055G02RIK	4931422A03RIK	SUN3	LRRC10B
				EGR1	PLVAP		PRRC2A	ADAM33	PMCH	CHRM3	N4BP2L1	ZFP493
				FCHSD1	SLC24A5		IMPACT	RASSF2	CRB2	PCDHB17	B4GALNT3	KLHL33
				ATF5	GDPD5		DCP2	FSIP1	LYSMD3	PPM1E	PNPLA3	CATSPERE2
				TMC3	CBARP		TCERG1	RASGRP1	MBNL3	GOLPH3L	LRRC18	C2CD4D
				CAPN8	TNFSF9		SNCAIP	IL1A	ZDHHC23	GM5424	LRRC29	ZFP964
				ATP6V0A4	PLPPR3		PPIC	PKIA	ARSI	CDH19	KCNJ2	BC049352
				PKHD1L1	CD276		PCYOX1L	RBM38	ETL4	RNASE2A	FAM169A	GM17039
				MBOAT1	BBS9		FBN2	FABP12	OLFR701	GPR68	OASL1	EIF4E3
				VILL	FMNL2		TCOF1	FABP5	PNPLA7	DMBT1	ABCA8A	GAL3ST2B
				GCNT1	MGAT5		PDGFRB	PROCR	WNT4	FGFBP3	CSDC2	CYP2D34
				CFAP157	LRRN3		CEMIP2	SLA2	DCHS1	LIX1	ZFAND4	4933433G15RIK
				TLR4	CEP135		NAA40	CCDC39	TRIM67	BEX4	MFAP4	GM26641
				F13A1	CALM2		SAC3D1	KCNAB1	STAG3	CXCR5	YPEL3	GM16998
				PRUNE2	TCAF1		UHRF2	PTPN22	NFKBID	ENO4	HEBP1	C330013E15RIK
				ORM1	PSMA8		POLA2	CD2	PML	TENM4	EGFLAM	D130020L05RIK
				ATP6V0E2	CNPY4		BANF1	GSTM4	ASAP3	LMOD1	QRFP	GM16740
				NCAM1	DCAF15		RIN1	SLC16A4	MGARP	MSX1	FAM129C	FENDRR
				TMEM246	PACRG		TESMIN	EFNA1	LARP1	GM6377	PNPLA1	GM26876
				MSANTD3	MAP4K1		LRP5	PRSS12	FER1L5	CCDC169	1700019D03RIK	GM16617
				PTGER4	NME1		STIP1	TLR2	SHANK2	CFAP100	TMEM221	4933417D19RIK
				GPR176	SLC16A9		MARK2	EFNA4	ADGRL3	GM12185	NCMAP	PANCT2
				EMP3	TGM2		TCTN3	ABCA4	ESYT3	ATP13A5	GIMAP7	MIR7052
				SLC25A24	H2AFZ		PIK3AP1	CTH	DDHD1	GM9833	GLS2	MIR6397
				SLC26A10	ANO10		TAF5	GTF2B	STK35	PLS1	NKX2-6	MIR7085
				MARCH9	CCDC92		GK	ORM3	OLFR16	TSKU	NHLRC1	GM20324
				PCK2	HPF1		P4HB	TNFSF8	IGSF9	ARHGAP15	APOL7C	GM28074
				CYP2S1	TMEM237		ARHGDIA	SVEP1	DNAH10	LRRC19	KLHL31	1700001J11RIK
				IL17RD	MPHOSPH9		GOT1	HACD4	SMIM3	CALHM5	PP2D1	NAALADL2
				NPNT	BTBD10		NFKB2	DAB1	CLDN22	APOL10B	ZC2HC1C	GM37500
				RAMP3	SPATS2L		GNL3L	LAPTM5	MTURN	EIF5A2	FAHD1	TIGD5
				NBL1	SATB2		APEX2	TMEM269	AW551984	CLDN8	TNFRSF26	GM31121
				CFTR	TFDP1		ABHD6	HPCA	MICAL2	PTGES	GPRIN3	A930003O13RIK
				SLC7A1	SAMD10		PADI3	TMEM54	SOBP	P2RY10	SERPINB9	MIR703
				FBXO2	IRS2		ITGA7	STPG1	HOXA5	CREG2	BC049762
				ENC1	ARHGAP18		TUBGCP2	CD164L2	PLCL1	VTCN1	IGFALS
				YDJC	USP6NL		IFITM1	FGR	TXNIP	SV2C	GSG1L
				RAPGEF5	POMT1		CHID1	SMPDL3B	PMEPA1	MSANTD1	TTC6
				SLC35F2	DUSP10		TNRC6C	KCNAB2	SRCIN1	GFOD1	HNF4AOS
				GJB5	NUP133		KLHL4	TNFRSF9	OLFML2B	ZFP52	LTB4R1
				MGAT3	STRIP2		PHF6	PRXL2B	NOS1AP	KCNJ16	SPSB4
				AA986860	SLX4		RPS6KA6	TAS1R3	CREB3L2	FAM229B	ODF3B
				CUX2	CPLANE1		TMEM47	PROM1	ALPK3	RHOX2A	PAXX
				TCEAL9	XKR5		NUDT5	AFAP1	SHFL	CD209F	FBXO40
				UPK3B	MCPH1		ADAM23	KRTCAP3	MYO16	LAX1	GNG7
				PTGIR	SLC39A5		SLC39A10	GNPDA2	AK5	BTLA	DEPP1
				RNF227	TTC12		ACADL	GABRB1	ANPEP	SLC6A7	CXCR6
				PLD6	SEMA3D		ORC2	SPP1	METRNL	RASAL3	GGNBP1
				COL6A6	BC052040		COL3A1	CDS1	LGI2	HBB-B1	PRSS50
				DMRTA1	GEMIN8		PTP4A1	PRKG2	WDR17	ST6GALNAC3	NR1H5
				1700048O20RIK	DOK4		GLS	TESC	CDH6	JUN	RARRES1
				NXPE4	SNRNP25		MGAT4A	NOS1	MREG	KLRC2	TMIE
				MAB21L3	RCC2		FN1	PF4	CNTNAP2	9030619P08RIK	CCDC69
				ACKR3	OSTC		DES	CXCL15	AJAP1	MTERF1B	CYP2G1
				LACC1	OSGIN2		OBSL1	CCR9	PPP1R3F	GM609	FAM161A
				SLC16A13	RPUSD1		PDE6D	ST7	NPHP4	SLC22A26	SCD4
				NYAP1	SERPINA3G		CLN8	TES	LMBRD2	NRGN	HAMP
				SH2D5	SDK2		PAM	TFEC	CERCAM	GAS5	CYP8B1
				HCAR2	ALG13		LCT	TFPI2	GABBR2	SHISA7	ADRA1B
				KRT14	KIRREL		CFH	ELN	DAG1	SKIDA1	GP1BA
				PRR15	HAUS1		CD55	SSC4D	DTX4	A430110L20RIK	ZFP455
				MTMR11	IPO9		C4BP	PTN	PNRC1	MSI1	OLFML1
				OLIG1	SHISA4		SRGAP2	CLEC5A	CCDC114	MGMT	PARD3B
				GLDN	FAM222A		LAMC2	TBXAS1	DNM3	XLR	TBC1D30
				RBP1	SPIDR		CDC42BPA	M1AP	CDH18	MMRN1	CCDC171
				B430212C06RIK	ARSB		AHCTF1	ARHGAP25	GGT6	9130008F23RIK	SLC22A30
				LRRC75A	SESTD1		ACBD3	GKN3	ZFP609	LRTM2	5830454E08RIK
				C1QTNF2	MUSTN1		PYCR2	CLEC4E	ABCB1A	WDR86	ZMAT1
				TIFA	SUN2		OPN3	CLEC12B	ILDR2	H2-Q5	GAS1
				TENT5B	ASXL1		POU2F1	CLEC1B	PPIP5K2	ZFP459	CYP2F2
				GPRC5A	ID1		KIFAP3	OLR1	SH3BGR	B4GALNT4	ADH6A
				FAM221A	EXOG		KCTD3	KLRA13-PS	PHC1	GJA6	2310001K24RIK
				GM527	GPR153		LPGAT1	PLBD1	ZFHX2	MAGEA2	3110082I17RIK
				A2ML1	HECW2		PACC1	LRMP	HESX1	FUT2	KLF1
				FLRT2	SNAI1		NMT2	KLRB1C	LAT2	NOD2	IFI205
				CD300LF	MAMSTR		DDR2	RTN2	SPEN	CYP3A11	TPRKB
				A4GALT	TUBA1C		CCDC3	PPM1N	CROCC	ST3GAL5	LIFR
				SSTR2	2510009E07RIK		MGST3	DMPK	OSBPL10	CNGB3	FABP1
				DMRT2	EPOP		NSUN6	LILRA6	FOXA3	GULP1	GM4876
				CYP4F16	KCNS3		DARS2	SIGLECE	MILL2	ANKRD29	METTL7A1
				MMGT2	ADAMTSL5		TNN	TDRD12	IRGQ	CXCL2	VMAC
				CD300E	LSM8		PRKCQ	RAB38	HECTD2	DHCR7	CYP2C50
				IGF2	GM1821		ODF2	CTSC	CHRNB1	0610039K10RIK	KBTBD13
				NTF3	CDKN2A		STXBP1	TYROBP	AK7	OPN1SW	RAB39
				THEMIS	9930012K11RIK		TOR1B	2200002D01RIK	ATP1B2	COL25A1	EPM2A
				C5AR1	SCML4		GPSM1	MYLPF	ENTPD3	ENO1B	TCP10B
				SPATC1	LSM11		TRAF2	MVP	CCDC74A	R74862	KBTBD11
				MORN4	4930503L19RIK		SSNA1	TBX6	MVK	ACTG2	GHR
				GAL3ST1	ZFP367		ZMYND19	CORO1A	MFSD9	KCNG2	TMEM150A
				ANKRD55	DDX28		SSRP1	CD19	TNFRSF18	HSPA2	TRIM34A
				PPP1R3D	SH3TC2		CLP1	FAR1	ARHGEF11	FCRL1	COL8A2
				SHISA3	CEP295		ITGAV	DKK3	ZBED3	CTF2	ZFP658
				VWA3B	ZFP518B		ITGA6	PAK1	KLHDC8A	PLAAT3	JAKMIP3
				LGALS3	FAM187B		KATNBL1	COX6A2	VWA1	OLFR920	INCA1
				PCDH20	ZFP41		CSTF3	ITGAX	KLHL23	CYP3A59	CES1G
				PHOSPHO1	D030056L22RIK		CAPRIN1	CD37	TMC7	CCN6	NAT8F1
				HS3ST1	ANKDD1B		SEMA6D	HSD17B14	GJB3	NCR1	SCIMP
				GIMAP9	TGIF1		JAG1	ITGAL	DLGAP3	CSPRS	ARHGAP24
				FAM83A	ERFE		CDAN1	RGS10	CCNO	NUMBL	UGT2B37
				MSRB3	BAIAP3		SPRED1	BAG3	ABCB4	UBE2D2B	ZFP85
				NCALD	ZC3HAV1L		FERMT1	TRIM30A	GOLGA7B	LY6M	GM8369
				CD14	TRIM16		NDUFAF5	LTO1	MAFF	MAPK15	HOPX
				AKR1B7	CDCA4		XRN2	SASH3	TTC9	MAGEA6	PTK2B
				SEMA5B	TMEM229A		MAPRE1	ELF4	LGR6	LOC115487607	B3GNT8
				CD177	LHFP		CHMP4C	CACNA1F	FAM89A	SNORD58B	TRIM5
				BHLHA15	MLF1		PTPN1	PRAF2	IL17RE	RN7SK	TNFRSF19
				ACOT4	MLEC		ATP9A	WAS	HIC1	SNORD49A	H2-EB1
				EZR	RHNO1		E2F5	BTK	TMEM64	LOC115488999	SERPINA6
				CEBPE	ARMCX3		CAR13	SERPINA7	CASC1	C330021F23RIK	LSAMP
				PKDREJ	ZBTB45		CAR2	IL2RG	DPY19L3	ZFP979	MAML3
				ADARB2	UBALD2		ARFGAP1	GPM6B	S1PR2	ZFP600	CYP2D22
				CPNE8	SCG2		EIF6	VEGFD	ZFP469	SERPINA3C	CES2C
				ASAP2	CDR2L		RPN2	ARHGAP4	ADGRD1	IFI208	UGT2B38
				MAP1B	PLPP2		TTI1	AVPR2	PCDHB21	ZBTB16	HSD3B3
				SOCS3	SLC39A1		SKIL	MCF2L	PCDHB14	FXYD6	IFIT3B
				HUNK	H1F3		ACTL6A	CD209A	TNIP3	ASB18	CYS1
				DPEP2	SAE1		ANXA5	PTPN7	IL20RB	SLC22A7	STAT4
				MAST1	REEP1		NBEA	GPM6A	4933427E11RIK	TRIM43C	SLC22A28
				SLC51B	RNF26		SSR3	ASB5	GPR4	KLRI1	HSD3B2
				MIGA1	PRX		SERPINI1	FGFR1	ALKBH2	RPL34-PS1	PRR36
				ZFP101	PLXNB1		INTS3	KCNU1	SHISA2	PNP2	PLCXD1
				SPINK5	PTRH1		TPM3	PDGFRL	CCNJL	UBA1Y	ETHE1
				GPC3	1810037I17RIK		LARP7	PDLIM3	PRRT3	H3C6	AOX3
				FMNL1	PNMA1		PLRG1	ADCY7	GM4779	GM4925	LRRC51
				CLCA3A1	GEMIN6		GUCY1B1	TBC1D9	PCDHB7	NKAIN2	MIR7-1
				RDH9	CD248		GAR1	ZFP330	S1PR1	TMEM100	MIR27B
				MPZ	IER5		FUBP1	THY1	PROSER2	HBA-A2	ND4L
				NFIL3	GM5420		ARHGEF2	IL10RA	FAM186A	HBA-A1	ADAMTSL1
				ZFP607B	CAPG		CHD1L	CD3E	ZSWIM3	SNORA33	MUP3
				BCL2	ST8SIA3		METTL14	PDZD3	SBSN	TRIM80	GM16551
				VMN1R53	TTC26		TMEM56	TMEM218	TTC39D	WFDC16	KLK1B4
				LEPR	BRD9		EIF4E	TENT5A	PLAUR	PNMAL2	HES6
				SEPT11	MEGF6		WLS	PSTPIP1	SMCO1	CES1A	JCHAIN
				GM5148	ZFP105		GEM	GCLC	JRK	ARMC2	H2-K2
				SPOCK2	TSPAN7		FAM92A	CMTM7	RNF222	AKR1C19	PPP1R3C
				H2BC8	RCAN3		LMO4	NGP	PRR12	RNLS	XLR4B
				TUBB2A	9430015G10RIK		HSDL2	LRRC2	GJB4	GM960	CYP2D9
				VPREB1	ATP8B4		WDR31	LTF	8030474K03RIK	TMEM28	TNFRSF13C
				CDH24	PPIH		ZDHHC21	TRF	PLA2G4F	VMN1R4	APOL9B
				FLOT1	ATP8B2		FKTN	MANF	CLDN2	FNDC1	RNASE13
				PCNX2	PLEKHH1		MLLT3	PYGM	KCNE4	NANOS1	C730014E05RIK
				IFITM2	TMEM263		TXNDC12	OAS3	DLK2	AHNAK2	ZFP467
				H4C3	NUGGC		CAAP1	ALPK2	ARL4A	SERPINA1E	GSTM6
				CDH3	DOT1L		EXO5	RIMS3	INHBE	NUP62CL	SELENBP1
				CYP4F39	SERPINA10		HIVEP3	CNTNAP3	DLGAP2	GPRASP2	SLC7A14
				SFMBT2	LMNB2		P3H1	LPCAT2	NXPE5	ADAM4	LYZ1
				AKAP6	CKS2		CCDC163	RAC2	FRAT2	GM4787	CES3A
				GDPD1	ARF2		PIK3R3	GSTT2	PCDHB16	GPR174	4930581F22RIK
				SPHK1	ACTG1		TAL1	ARHGAP44	TRAPPC9	2410018L13RIK	MN1
				OBP2A	ICA1		HSPG2	CYSLTR2	AMIGO2	H2-T-PS	ZMYND12
				FMR1NB	NMRAL1		ZBTB8A	CRYGS	FBXO43	H2-BL	1700055D18RIK
				RPP25	AMD2		SFPQ	CASP4	MYPOP	H2-Q6	GM10319
				CYP26C1	DZIP3		AU040320	FA2H	4930539E08RIK	LST1	GM4952
				FABP4	TNNT1		ZFP593	GABRB3	ATXN7L2	PNLDC1	SLC39A2
				LDHA	ANO6		SH3BGRL3	VAV3	KCNK3	IFI207	H2-AB1
				LRMDA	H4C12		NUDC	BC034090	FUT4	IFI213	GAL3ST2C
				TNFRSF11B	RNU73B		PPP1R8	LGALS3BP	TMEM200A	PAPPA2	MUP7
				IPCEF1	LOC115486693		SESN2	TRIM36	GPR55	GM5532	ZFP872
				FBLN2	SNORD22		RCC1	KCNK1	PHETA2	EFCAB7	IFIT3
				LOC115489083	NCK2		GMEB1	CD226	GLP2R	CDKN2B	GM14207
				LOC115489081	VSIG10		CDK14	GALNT17	FHL4	HBB-BT	PRCD
				CYP4A10	BUB3		H6PD	LYL1	TDRP	4930520O04RIK	SMIM6
				PILRB1	FRAT1		LZIC	VAV1	GM867	FBXW15	DNM3OS
				H4C11	TSPAN6		RINT1	MAB21L4	PRAG1	4930513N10RIK	PLEKHN1
				SLC4A5	S1PR3		SKI	RNF43	CH25H	PLEKHF1	LOC115489950
				SSBP4	NNAT		GNB1	RASL10A	SEPT6	COX7A1	BNIP3
				XNTRPC	LGALS1		MXRA8	BATF	B230217C12RIK	CYP2A4	CYP4A12B
				IL18BP	H2BC21		CD38	WDR5B	VSTM4	ZFP109	1810010H24RIK
				SERPINH1	FAT1		HTT	CACNA1A	TVP23A	BGLAP3	MUP10
				LRRC73	TLNRD1		PCDH7	FAM171A2	MAP10	GM10705	TMEM8B
				ANG	VSIG10L		STX18	TLE6	INSL6	GM826	GM20878
				TUBA1A	ROM1		PPARGC1A	GLIS1	FAM160A1	SIRPB1C	IGTP
				EAR2	LRRN4CL		PGM1	CCDC122	FAM71E1	GM12359	TGTP1
				ZFP9	APCDD1		KLF3	GNAT1	ADNP	DIO3	LOC102632463
				NOXRED1	SOD3		RFC1	XKR6	GDF6	MIR697	GM6614
				NUDT11	CCDC160		TMEM165	UBD	TAF7	ASS1	PHYHD1
				D330041H03RIK	2500004C02RIK		CLOCK	ANO4	CACNA1C	LOC115490266	GM11127
				PCDHB22	1700066B19RIK		MTF2	SPCS2	FHAD1	LOC115489055	NAT8F5
				ECSCR	OMP		ANTXR2	CCDC106	CBR1	LOC115490267	MPP4
				OSGIN1	IL4I1		WSB2	TRIM13	GM6583	SNORD17	XLR4A
				GM10639	MISP3		G3BP2	PCYT1B	H1F4	F630028O10RIK	C920021L13RIK
				ADH6B	ZFP382		STX2	TPBG	TMEM198	PSME2B	GM12216
				REC114	HEG1		FAM216A	ADRB1	TAGAP1	KLHDC7A	GM11423
				GM15348	AARSD1		GPN3	CCL12	DNAH3	1700045H11RIK	4833418N02RIK
				TOX2	FYB2		ANAPC7	CFAP53	MPP3	GM14391	GM7854
				HSPA12B	DACT3		ANAPC5	KANK4	NAV2	SYCE3	D630024D03RIK
				LY6A	RNF138RT1		INTS1	ABCA17	TERB1	CES1B	5430402O13RIK
				SELENOM	GM11335		MAD1L1	CCR3	PRKG1	ZFP429	CHRNA1OS
				AIRN	FOXD2OS		LFNG	FBXL21	RNF157	C7	CHN1OS3
				GM5150	GM11837		ACTB	ISG15	MLLT11	CLEC7A	4930481A15RIK
				GM14288	BTBD18		SDSL	GGTA1	TARM1	MAGEA5	GM16143
				NAIP2	GM11827		ERP29	PPP1R26	HHIPL2	MAGEA8	GM15133
				MS4A6C	GM13889		ARPC1B	ZFP983	SRCAP	CNTF	1810021B22RIK
				TMSB10	AI662270		FLT1	INTS6L	SYNE3	COL4A3	GM11266
				HAUS3	GALNT2		COL1A2	SLC2A6	ARFGAP3	GM14966	EPB41L4AOS
				MUC4	EID1		SLC13A1	HYAL3	ANO9	H2-Q1	TGFBR3L
				ULBP1	GM17359		EPHB4	RFXANK	FSD1L	H2-DMB1	UGT1A5
				SPACA6	ZFP850		CYP3A13	H1F2	RND1	RHOX2H	GM765
				SNORD100	2500002B13RIK		CALD1	SAPCD1	CTSJ	RHOX2C	5730435O14RIK
				A930006K02RIK	9230114K14RIK		AKR1B8	SH3BP4	PGBD1	FAM71F2	GM20522
				DBHOS	C030034L19RIK		FKBP9	H1F6	MAP6	2610203C22RIK	NEAT1
				GM13056	H3C7		TMEM209	KCTD1	TCF7L1	EEF1AKMT3	1700092C10RIK
				APPBP2OS	1700007F19RIK		HERC6	P2RY13	IRS1	GM12174	B130034C11RIK
				GM15638	PCDHGB6		AOC1	MARCH1	RGS9BP	GM15760	GM21885
				GM13021	PCDHGA5		TRA2A	MAG	PARD6G	LOC115489189	CCL21A
				GM15743			CBX3	C1QA	CHN1	D930015M05RIK	D630033O11RIK
				CTCFLOS			TCAF2	C1QC	HOXB8	GM11944	VMN2R29
				LOC115487869			PRDM5	C1QB	RETSAT	BB218582	LOC115488051
				PRR22			SLC37A3	RAB8B	4930465K10RIK	GM16063	GM21992
				APOL11B			GFPT1	TMEM71	USP13	GM13483	A330023F24RIK
				GIMD1			PRADC1	PPP1R14A	SCN3A	TRP53COR1	GM16845
				CYP2C69			BMP10	KRT80	GNAI1	GM16731	9330151L19RIK
				2810047C21RIK1			COPG1	SYN1	MEX3B	LOC102632821	GM26698
				GM20482			SEC61A1	SPRED3	FGF18	XIST	A430046D13RIK
				RNASEK			PLXNA1	TRAF3IP3	MDN1	GM12915	2310001H17RIK
				LOC115488583			CHCHD6	CHST7	CHSY3	4930405A21RIK	GM16793
				GM10130			ERC1	NENF	MCM9	MAN2C1OS	6230400D17RIK
				SNHG18			FAM234B	EPHX3	UBE2E2	PLXNA4OS1	9030616G12RIK
				4930509G22RIK			WBP11	RSKR	SH2D3C	E130102H24RIK	5730420D15RIK
				GM4262			KCNJ8	SPAG1	MFSD4A	SNHG20	RASSF10
				GM16712			KRAS	ATOH8	NKAPL	4930429F24RIK	0610031O16RIK
				GM38684			CAPRIN2	KCNK2	HADHB	2610035D17RIK	2410022M11RIK
				2700038G22RIK			IFT122	GPR160	NHS	LOC115490183	6030407O03RIK
				PTGES3L			PZP	2810032G03RIK	TSKS	LIPO2	1810044D09RIK
				GM16702			MZF1	NEK5	NTM	BLOODLINC	MUG-PS1
				GM7467			VASP	MBL1	KIF13B	4930506C21RIK	2310040G24RIK
				GM17767			ZFP719	ADH4	ZFP462	AW549542	TSTD1
				GM4131			PRMT3	IQCH	CALN1	GM16576	RHBG
				MS4A4A			SNRPA1	ACKR1	IRAK2	LOC115489854	A230001M10RIK
				GM19710			UNC45A	SIRPA	1700019A02RIK	PIRA2	5033403H07RIK
							IDH2	INPP4B	TAOK3	GM16573	GM43568
							PAK4	FGD3	KRT79	UGT1A7C	GM5767
							ZFP626	SNN	HIPK2	UGT1A9	9530062K07RIK
							PIK3C2A	SOCS1	OBSCN	GYPC
							NSMCE1	CRYGN	H2AC10	TEX9
							KDM8	PRDM1	LMTK3	HSPA1B
							THAP12	PRKAB2	SERPINB2	PABPC4L
							TGFB1I1	TRPM4	TLR12	H2-Q2
							ADM	SEMA7A	NCS1	CYP2A22
							NOMO1	ASIC3	KCNC3	HSPA1A
							UBFD1	TCTE2	9130023H24RIK	4930515G01RIK
							GGA2	ANKRD35	D630045J12RIK	RPPH1
							CTBP2	REEP2	SEMA3E	MIR5125
							ATP6AP2	TM6SF1	PCDHB5	AA465934
							USP11	CTSS	PAQR9	4933438K21RIK
							HMGN5	SCUBE3	LOC115489078	SULT2A7
							CSTF2	TRPS1	LOC115490009	MAGEA3
							LRCH2	HOXB7	LOC115485682	LOC115490316
							RPS6KA3	1700028J19RIK	SNORA30	GM5294
							RBBP7	OST4	LOC115489084	RNASET2B
							BGN	SLCO4A1	SNORD7	E030018B13RIK
							HCFC1	PPP1R9B	LOC115489086	EDARADD
							MPP1	TSPYL5	RPLP0	RHOX5
							RBM41	TTC16	CAPN6	ERDR1
							RASA3	GIPC2	LPAR5	RHOX2F
							NEK3	RUNX2	MAS1	H4F16
							TPTE	TEKT5	COL8A1	SMIM22
							SLC25A15	STX11	GM128	LOC115490317
							ADGRA2	GIMAP3	SYT11	A230028O05RIK
							LEPROTL1	PRSS23	NR2F1	GM16982
							GINS4	MYO9A	ZFP72	1010001N08RIK
							SLC25A4	TRMT9B	ARID1B	GM16907
							SALL1	PIK3CD	GM10277	1700109K24RIK
							EIF2AK3	PLCB2	CACNG7	GM17597
							SLC10A7	ARNTL2	SLC47A2	GM2061
							RFX1	BACH2	9930111J21RIK2	PLATR4
							SMARCA5	OLFR56	SCN2B	GM16794
							PHLPP2	ARHGAP9	ADAMTSL3	B230217O12RIK
							ST3GAL2	LRRD1	SLC6A21	4933405D12RIK
							ARL2BP	MTERF1A	ACNAT1	MIR6240
							KATNB1	CFAP69	WFIKKN1	MIR6236
							LSM4	MILR1	E230015B07RIK	GM7967
							INTS10	C3AR1	ZHX2	GM28856
							CMTM3	GSTM2	CCDC112	2310034O05RIK
							CBFB	TMEM51	KLF12	1810053B23RIK
							DUS2	CLCF1	GM10364	1700119H24RIK
							PLA2G15	CREG1	NFXL1	GM28321
							TERF2	RCSD1	BHLHB9	IPW
							TAF1D	CD53	ZFP449	GM12669
							TMEM170	KCND3	GM10653	GBP5
							AARS	ATP1A3	PIRA11	C330024D21RIK
							URB2	CABLES1	FAM83C
							JAM3	LRIT1	SPDYE4C
							GRIK4	MYZAP	PDZD7
							UBASH3B	CACNA2D4	B3GALT5
							ETS1	H2-OB	4930431P03RIK
							SLC37A2	MBP	PMS2
							ILF3	GUCY1A2	SELENOI
							BMP5	KIF21B	OXCT2B
							SMARCA4	RIMS1	LOC115487534
							FEM1B	PGM5	HMGA1B
							CALML4	TREM3	AW011738
							ZW10	LAD1	NKAIN1
							PAQR5	RHOD	G6PC
							PTPN9	S100A10	NLRP12
							MPI	DZIP1	ZFP968
							LRRC1	BEND6	GM14440
							TMED3	TREM1	MON1B
							CAR12	UBASH3A	LNCENC1
							CIAO2A	FREM3	COL22A1
							ATR	FAM227A	B3GNT7
							UBE2CBP	SELENOK	HOXA3
							CRTAP	BEX2	AA413626
							STT3B	TRIM46	LOC115487006
							MRPS22	MUC1	LOC115488601
							SMARCC1	FLT3	CCDC85C
							MLH1	FGF11	GM14827
							TTC21A	SERPINB6B	MED9OS
							SRPRB	GNG2	3010003L21RIK
							GNAI2	FAM13C	2410003L11RIK
							NICN1	FILIP1L	BACH2OS
							EML4	ACOT6	9630013K17RIK
							GTF3C1	LGALS2	NUDT12OS
							CNTROB	UNC5CL	B230206H07RIK
							ANK2	VPS37D	FRS3OS
							PWP2	B430306N03RIK	2610027K06RIK
							ARHGEF17	BICDL2	GM12505
							CSPG4	CLEC4A3	TMEM274
							HSPA13	A530064D06RIK	GM13710
							FKBP1A	RELL2	GM14167
							NPAT	NPB	AV039307
							SENP1	EML6	GM13427
							TRIOBP	C130050O18RIK	FCOR
							NOL12	IL1F9	GM16299
							SHF	HEPACAM2	A930011G23RIK
							TTLL4	VSIG4	USP49
							PTPRM	AQP5	VGLL3
							RPGRIP1L	PCED1B	CYP4F17
							FEM1C	TEX38	GM17102
							KDM4A	IL27	E130317F20RIK
							PRRG3	PHF11A	4930556N13RIK
							FRRS1	KCNJ10	MIR3058
							NUDT15	TRMT10C	GM20619
							CTDSPL2	CD300C2	LOC100503923
							PPIP5K1	TLR1	H2BC13
							RBFOX2	CETN4	GM7102
							ADGRB3	MEGF8	ZFP748
							HACD3	S1PR5	CSTA2
							ZFP7	TUBB2B	LOC115487263
							SF3B3	AI467606	SHISA8
							FOXH1	LRRC3B	FMR1OS
							LRRC58	FNDC7	9230116N13RIK
							CCND3	6330549D23RIK	GM26847
							USP54	OLFR433	2310043M15RIK
							JDP2	FPR1	A330069E16RIK
							KCTD9	PIGZ	MIR8091
							ZBED4	PQLC3	MIR7651
							RAMP1	BASP1	MIR7027
							CPNE2	GVIN1	JMJD7
							MAD2L1BP	C2CD4C	2310068J16RIK
							HMGXB4	GAPT	H3C11
							ZFP418	EID2	PCDHGA12
							HDX	TMEM229B	GM7694
							PPP1R18	ADAMTS6	PCDHGA1
							ZYG11A	NXPH1	B430319G15RIK
							TMEM109	PCDHB20	1700001G17RIK
							BMP2K	PILRA	PCDHGB7
							TDG	COX17	GM3519
							RNPS1	SPIN2C	GM19757
							COLGALT1	OLFML2A
							GIPC3	PKD1L1
							LY6G6F	RBM12B1
							DHCR24	ADAM24
							LBX2	MPEG1
							BAZ1A	LRRC75B
							WDR78	ATXN1
							TUBG1	PRR15L
							EOGT	CD24A
							HELQ	TAF9B
							NUP37	H2BC6
							MBD3	PTGS1
							COX18	SFN
							SLC12A8	ZFP286
							PRDM4	METTL21C
							SBNO2	CLDN4
							RNF38	BC049715
							USP35	GAL3ST3
							PRKX	TCTEX1D4
							SUPT16	UST
							DAGLA	CCDC88B
							FBXO45	MARCKSL1
							PALM	SYNB
							PAWR	PALM3
							RNF126	ENTPD1
							UBA6	SELPLG
							DENND5A	TMEM136
							PARP2	JAML
							ADAMTSL2	MYOF
							SUGP2	ZFP454
							RIF1	P2RY6
							ARMH4	ARHGAP30
							LRRK2	CLEC4A1
							EXOC1	CCR2
							BTG1	RTL5
							FAM13B	TCEAL1
							TTYH3	ZFPM1
							CHST12	TIFAB
							TTLL7	BC048671
							WDR44	NLRP10
							CNEP1R1	TMSB4X
							LIN37	RASL11B
							HSPB6	LRRC25
							PROSER3	AMZ1
							DNA2	CCDC158
							GTDC1	SARM1
							4921524J17RIK	F2RL3
							SPRYD3	KLRE1
							NXT1	EVC2
							HK1	FZD2
							IL22RA1	SLC25A2
							CLIC4	SYNPO2
							4932438A13RIK	GPR18
							STAG1	CARMIL2
							MAN1C1	SPRR1A
							BBS7	PNMA5
							SRRT	LYPD6
							CNNM4	FAM78A
							DEPDC5	ANKRD37
							SLC18B1	EFCAB5
							INTS7	AMIGO1
							UGGT1	APOL10A
							PLEKHG2	ADGB
							CLBA1	SERPINB1B
							ZBTB42	P4HA3
							LIMCH1	4930579K19RIK
							PTGER2	NYX
							RTKN2	NAT8F3
							RCOR1	9630028B13RIK
							ZC3H7A	FFAR2
							DHX38	BBS12
							ARAP2	SPN
							IGSF8	PCDHB11
							PTPDC1	WDFY4
							FKBP14	PCDHB6
							TMEM181A	TREML4
							NOTCH3	KCTD14
							P3H2	WFDC21
							SNX10	MEST
							1700066M21RIK	TLR11
							SGSM2	RGS14
							LASP1	RBM12B2
							DENND2A	PLD4
							MESD	ZEB2OS
							INIP	FPR2
							AKAP12	CX3CR1
							MED30	MOGAT2
							NEPN	C130026I21RIK
							DSEL	D930048N14RIK
							NUDCD1	BC004004
							HACE1	TRIM30B
							RALGPS1	A630001G21RIK
							BPGM	OAS1A
							KAT7	JUNB
							SCCPDH	PRKCB
							TXNDC5	CD8B1
							CHAD	CLEC12A
							TBC1D19	BCL3
							1110008P14RIK	RAET1E
							TBC1D25	AI854703
							EXOSC2	SLAMF8
							MTMR7	SMAGP
							MTMR12	GPER1
							TUSC3	NEBL
							RCAN2	PPFIA2
							MRPS6	ECH1
							NCOA7	NANP
							HTATIP2	FAM83E
							ORAI2	SPOCK3
							KMO	CEACAM2
							ZFP335	SYTL5
							NHSL1	OSCAR
							TMEM120A	TXK
							ALG14	GM9958
							RHBDD2	CNTN1
							PLCB4	RBM3OS
							MRAP	ZFP811
							HIP1	NTRK2
							ZC3H12D	TIMD4
							NUP43	DNAAF3
							DISP2	TAFA3
							CACNA2D1	GM14137
							REP15	SAG
							GORAB	OTULINL
							HS2ST1	TICAM2
							THBS1	AI504432
							NXPH4	PLA2G4A
							KLHDC4	MS4A4B
							BCOR	ZFP981
							SGMS1	ADAP1
							OFD1	PTAFR
							MIS12	CHST13
							BACE2	APOL8
							KAZN	GM13199
							DNPH1	A930024E05RIK
							HMGN1	HMGA2
							COL16A1	SKAP1
							SCAMP5	GJA5
							HNRNPUL1	TMEM140
							DLK1	AB124611
							ELMO1	CHST3
							CCDC8	RYR3
							SMC1A	GM10012
							THOC6	XLR3A
							TMEM29	NFAM1
							MDFIC	GM5431
							MFSD6	ZFP980
							ARHGAP32	PIRB
							TARDBP	C1QTNF3
							PIEZO2	FCGR4
							RBP3	IFITM6
							PRELP	CSF2RA
							AMOT	SLC14A1
							UBR7	FCGR3
							GM20604	CCDC154
							PPP2R2D	KRT4
							TRAM2	ZFP930
							SYTL3	TMEM26
							ANKRD13A	ALOX5AP
							SLC16A6	H4C1
							TMCC2	KLK1B22
							UGGT2	CXCL11
							0610010F05RIK	PWWP2B
							ITGA1	H4C9
							MRTFA	KCND2
							SETD1A	ACYP2
							TSEN2	H4C8
							LEO1	SLC38A11
							PWWP3B	TMEM151A
							MIER2	C1QTNF7
							GAREM1	AKR1B10
							NPL	OLFR99
							STN1	RPS12
							SIPA1L1	IFNLR1
							AIDA	TGIF2
							SPICE1	HS6ST2
							DPY19L1	GLRP1
							TMEM82	LILRB4A
							UEVLD	KCNJ15
							LENG9	AI413582
							PGP	VMN1R51
							PDE12	ZFP938
							1520401A03RIK	CD300LB
							SLC36A4	GM8995
							NAALAD2	TMEM117
							ARF6	ZFP947
							TNFAIP8L1	SORCS3
							LNCPINT	CYP4A32
							RASIP1	KLK8
							LIPH	HCST
							NUDT18	IFI27
							RTN4RL1	SNORD37
							SOWAHB	SNORA41
							OLFR1033	LOC115488998
							PLEKHA7	SNORD118
							CDC42EP2	LOC115488275
							CCDC149	LOC115489855
							CCDC9B	SNORD104
							PCDHB8	LOC115488691
							CAVIN2	LOC115489082
							SLC25A51	LOC115489087
							POFUT1	LOC115487847
							CD109	LOC115487276
							SHE	SERPINA3B
							HNRNPA1	PLEKHD1
							4930430F08RIK	HMGN3
							CHTF8	PILRB2
							NXPH3	OAS1G
							KCTD11	CRYBA4
							CCDC66	KLRA3
							GLTPD2	SLC22A27
							MARS2	MYL9
							ZFP445	RTL8B
							NIPA1	ZFP760
							TMEM164	GTF2F2
							CLDN14	MKRN2OS
							MAGEH1	PHF11D
							C2CD3	SLC25A31
							CTDSPL	HIST1H2BR
							CLTB	LYZ2
							FBXO30	MARCKS
							RNF150	SULT3A1
							HS3ST3A1	UBE2U
							PHF13	WFDC17
							FLRT1	FCHO1
							RELL1	SLC35G2
							RBM15	MMP27
							COL6A3	FAM217B
							NAGS	SULT2A2
							FBXO10	ZSCAN18
							FRMD6	LILRA5
							PDP2	TREML2
							PHLDB1	SPX
							LEMD3	CCDC78
							CCDC6	NAIP5
							TMEM53	MFSD4B3-PS
							SLC35E4	TIGIT
							PREX2	NCF4
							ZFP518A	APOL7E
							IBA57	SLFN2
							KRT8	ZFP783
							LIG4	GPR27
							2810025M15RIK	GM10433
							VCPKMT	GM12258
							2610318N02RIK	RIPPLY1
							LPAR4	GM10451
							RPP38	CFAP47
							TMX2	4930599N23RIK
							SPRR2B	9030624G23RIK
							EVA1B	TRIM10
							TMEM37	GM6034
							CCDC126	LY6G6D
							PDIK1L	H2-KE6
							SELENON	GM4924
							PLEKHM3	IFI204
							HSPA14	FAAP20
							XRCC1	GGH
							TUBGCP6	AW146154
							E230016K23RIK	ZFP791
							GYPA	C5AR2
							RTL8C	AI429214
							B3GLCT	MIR100HG
							1700029F12RIK	LEKR1
							ROBO2	TMEM267
							NUP188	FOXS1
							GAN	CCL28
							ADAM17	4833422C13RIK
							UBA2	BC025920
							MAPK11	CTLA2B
							POM121	PAK6
							TANC2	H2BC3
							ZFAND2A	SLC22A29
							TXLNA	TNK2OS
							KDM4D	SP5
							LGALS4	SCN2A
							PDE5A	4930594M22RIK
							SLC25A40	GM10863
							FFAR4	LOC115485611
							MDM4	LOC115486187
							ATPIF1	SNORD89
							GIMAP4	SMIM24
							LCLAT1	RAET1A
							TMEM62	ABRACL
							EMCN	PERM1
							AP1S3	GM13212
							LRRC8C	TOMT
							SMYD1	SLFN1
							ZFP93	EVI2A
							TEAD1	GM9733
							ZFP458	ZFP973
							SOGA1	GM14308
							PPRC1	TGTP2
							FANCM	CPT1B
							CEP70	R3HDML
							PIGN	ZFP456
							FRY	IFI27L2A
							THEM6	CCR5
							ADO	ST6GALNAC4
							AAK1	PIN4
							ST6GALNAC2	H2-T10
							CEP170	CFAP77
							UXS1	4933416I08RIK
							EIF1A	ZGLP1
							BAK1	TTLL2
							GM10030	MIR1191
							SMCO4	B230307C23RIK
							DOCK1	H3C15
							RRP1B	SLC48A1
							NAP1L1	PIRA1
							COL13A1	H3F3C
							SKAP2	MIR1898
							EDA	INO80DOS
							TNIP2	ABHD11OS
							RP2	RUBIE
							SLC35E3	D830026I12RIK
							SNTB1	LOC105246847
							TOR3A	4930479D17RIK
							INTU	C530005A16RIK
							ZBTB40	GM11634
							SLC4A4	GM11476
							MMGT1	3110056K07RIK
							PHF5A	HOXAAS3
							H4C4	4930455G09RIK
							H2AC4	1700054M17RIK
							MED9	GM14634
							ARMT1	GM15462
							PPP4R1	SRRM4OS
							CTTNBP2NL	UBAP1L
							CNIH4	NBDY
							LANCL2	FTX
							RAPGEF2	GM6787
							ITGB1BP1	PRKAG2OS1
							SYT9	ETAA1OS
							ACADM	2210417A02RIK
							MAPK3	AI427809
							CLIP2	0610009E02RIK
							1110038F14RIK	GM15527
							SCOC	A230103J11RIK
							HACD1	GM16062
							USP31	GM15420
							TMED5	5730405O15RIK
							B9D2	A330041J22RIK
							SNRNP70	4933406I18RIK
							NUP98	GM15910
							PRPF38A	CD55OS
							CREM	LOC115487311
							MED14	LOC115486069
							CENPJ	LOC102632231
							ZFP69	KLRA8
							GPBAR1	TMSB15B1
							CLASP1	RDH1
							SIVA1	BCL2A1B
							SNORA23	FBXO24
							MED18	SRPX
							GM1976	BC035044
							PRPF4	UGT1A2
							ANKS6	GM10612
							FLVCR1	ITGA10
							HMCN1	LOC102637720
							SERPINB5	CAR15
							GM14149	2810442N19RIK
							ZFP948	1810064F22RIK
							AFDN	H4C14
							CCDC134	PHF11B
							MACROD2	GON7
							FLNC	BEND4
							H2AC20	SLC22A13B
							PDE7A	ART2A
							FGFR1OP	NLRP1C-PS
							H2BC7	MIR5100
							H4C6	RAB26OS
							B3GNT9	LOC115487690
							FBXO47	SIRPB1B
							CAPZA1	1700001J03RIK
							RNF121	GM9530
							AURKC	PVT1
							SRSF3	1110020A21RIK
							ARHGEF10	GM4419
							TTC9C	GM26760
							ZBTB3	CDIPTOS
							CSF2RB	4933440J02RIK
							SPIN4	GM19705
							SMPD5	1810019N24RIK
							TRIM6	GM17644
							GDF2	4632428C04RIK
							PGAP1	9530027J09RIK
							CPLANE2	5033417F24RIK
							ALG6	C430042M11RIK
							TRIM68	A230107N01RIK
							SNRNP40	AA543186
							CCDC61	9430065F17RIK
							EHD2	9130213A22RIK
							SMCP	MIRG
							MEX3A	4930528D03RIK
							BC029722	E230029C05RIK
							TSPYL3	4930552P12RIK
							ITPRIPL1	F630040K05RIK
							GRK6	5430416N02RIK
							PTAR1	9330104G04RIK
							FNBP1	BVHT
							ALG10B	BIN2
							LOC115487513	SNHG6
							SNORD83B	MIR6993
							SF3B5	PLA2G4B
							GM10941	TCF24
							EMC1	MIR7664
							ARHGAP8	2900093K20RIK
							LY6C1	1700030C10RIK
							STARD6	BCL2A1D
							BBIP1	1700047M11RIK
							SMC2OS	OVOL3
							VAX2OS	F730311O21RIK
							GNASAS1	1700108F19RIK
							CD101	2610016A17RIK
							LOC115487522	1700025B11RIK
							LOC115487050	1600010M07RIK
							LOC115489634	1810026B05RIK
							CBX6	BCL2A1A
							ZFP966	LY6A2
							IER5L	OLFR1034
							SLC5A3	1810041H14RIK
							ZFP882	PCDHGB1
							TTBK2	GBP6
							TMEM189	GM5547
							CFB	4930596I21RIK
							SNRPE	1600023N17RIK
							4930405O22RIK	GM35507
							LSM5	GM31693
							RPL41	D5ERTD605E
							HIST1H2AP	GM6598
							ITPRIPL2	GM2011
							H2BC15	GM16630
							FAM177A
							LBHD1
							5033403F01RIK
							SNHG5
							GM10390
							A930007I19RIK
							GM27216
							MIR7013
							XNDC1
							2900097C17RIK
							PCDHGB4
							4930557K07RIK
							GM19434

## Sheet: WGCNAmodule
Blue(M1)	Green(M2)	Red(M3)	Pink(M4)	Purple(M5)	Black(M6)	Yellow(M7)	Brown(M8)	Magenta(M9)	Grey(M10)
Cdc45	Trim25	Axin2	Acvr1b	Dpp9	Haao	Gna12	Dlat	Slc22a18	Ddx3x
Cav2	Hnrnpd	Calm1	Polr3d	Pex19	Sult5a1	Zfp385a	Comt	Pemt	Pxmp4
Klf6	Myo18a	Fkbp11	Sebox	Cbfa2t3	Serpinf1	Znf512b	Dbt	Rhbg	Hip1r
Ngfr	Mmp14	Calr	Sema6b	Zfp655	Slc13a2	Dlg3	Sox9	Naglu	Apbb3
Scpep1	Smg5	Mmd	Eef1e1	G0s2	Ftcd	Snrpn	Gm2a	Ugp2	Mef2d
Cdh1	Def8	Dnajb11	Sf3a1	Hyal1	Pon1	Cnnm3	Kat2b	Slc25a1	Ell2
Tmprss2	Marveld3	Zfp324	Zfp40	Cntnap1	Gnmt	Gramd3	Txnrd3	Dgcr6	Ifrd1
Pparg	Fam98a	Myo9b	Tmem39a	Tha1	Arrdc2	Siae	Acp5	Crot	Tat
Itga5	Peg3	Sgsh	Il17ra	Mafk	Apoe	Tmem25	Tcea3	Ndrg2	Rmnd5a
Abhd15	Ipo4	Usp40	Ranbp2	Mmp7	Inmt	Bbc3	Gstt1	Slc2a9	Angptl4
Icosl	Gtf2f1	Tbcb	Ier3	Slc22a5	Kifc2	Acp2	Gstt3	Cs	Slc25a42
Rpa1	Baz1b	Fam131c	Adck4	Slc16a10	Gpx6	Mov10	Nfix	Acot13	Plin4
Tcf7	Nab1	Hapln4	Stat3	Pcsk4	Apoa2	Nr2f6	Ppard	Cnp	Tbc1d8
Slc7a7	Mical3	Rabl5	Ppan	Pctp	Gpr108	Dyrk1b	Alkbh7	Mid1ip1	Fosb
Ilf2	Dusp3	Tmem184b	Wdr1	Acox1	Pdk1	Prkra	Adprh	Endog	Insig2
S100a4	Cyp17a1	Vav2	Tbl2	Nr1d1	Acaa1b	Btbd6	Cyp2c29	Iyd	5730403B10Rik
S100a6	As3mt	Stx5a	Hmox1	Acot2	Cyp2d10	Lipe	Grk5	Rab32	Hspb1
N4bp3	Cp	Dhdds	Por	Eci2	C8g	Btbd2	Prodh	Enpp3	Epha2
Nhp2	Mast2	Srp19	Prg4	Slc25a30	Cyp2j9	Sec14l2	Gstm7	Vnn3	Sod2
Col6a1	Ikbkg	Surf4	Kif5b	Chrna2	Sash1	Rps6ka1	Col5a3	Pcbd1	Bcl2l1
Cfp	Tmed4	Dnajb9	Lrrc8a	Myc	Qdpr	Hlf	Ndrg1	Avpr1a	Derl3
Timp1	Chmp2b	Hnrnpl	Rdh13	Ppara	Hsd11b1	Lpcat3	Mlxipl	Chac2	Aldh3a2
Uhrf1	Crkl	Trabd	Rassf1	Oplah	Pltp	Bid	Cyp2a5	Arf5	Plin5
Lsr	Itih3	5930434B04Rik	Tbrg1	Kif21a	Acsl1	Mtfp1	Adcy9	Dynll2	Tmem87b
Ckb	Snai3	Med22	Pabpc4	Ehhadh	Slc17a8	Ulk2	Ccdc159	Sept4	Abca1
Rnd2	Slc5a6	Th1l	Steap4	Adamts1	Tcp11l2	Fgfr4	Gcat	Srebf1	Gadd45b
Ube2c	Mettl1	E2f3	Gfod2	Il15ra	Igfbp3	Prkaca	Hyi	Mthfd1	Mapkapk2
Kpnb1	Tspan31	Atxn10	Slc41a1	Grpel2	Abcc3	Nr1i3	Hdac5	Dhrs7	H3f3b
Cyp51	Id3	Kctd2	Nolc1	Cpt1a	Fbxl20	Nat15	Rarres2	Gpld1	Sdc4
Tubb6	Hyal2	C1qtnf1	Slmo2	Gfra1	Srsf5	Nelf	Fpgs	Tmem14c	Wsb1
Col1a1	Prox1	Tbx3	Nup50	Pnpla2	Aldh6a1	Atp7b	Mkl2	Slc25a48	Hist1h2bc
Foxm1	Odc1	Wwc1	Ttpal	Fh1	Pcbd2	Neu1	Sardh	Nid2	Cpsf4l
Tubb5	Tmem167	Slc35b4	Serinc3	Optn	Ephx2	Mrpl49	Oit3	Arhgef3	Slc25a22
Stk38l	St3gal1	Gipc1	Pgs1	Rbms1	Sorbs3	Clstn3	Slc47a1	Ebpl	Sec14l4
Akr1b3	Ankrd52	Rab4a	Ahr	Timm10	Dct	Ubc	Rdm1	C9	Pdk4
Akt1	Prune	Ubb	Ddx39b	Atrn	C6	Apol7a	Psen2	Snai2	Tnfaip3
Tcirg1	Lbp	Gyg	Ltv1	Slc27a2	Fitm1	Pigyl	Adssl1	Serpind1	Arid5b
Chordc1	Ppfibp1	Gtf3c6	Ddx21	Nceh1	Ankrd33b	Elmo3	Dhdh	Cpn2	Sgk1
Sept7	Slpi	Uhrf1bp1l	Thap2	Hmgcs2	Slc38a4	Lass2	Evi5	Acy1	Arg1
Nacc1	Il13ra1	Hsp90b1	Txnrd1	Tmem56	Il1rap	Rxrg	Ptgds	Wfdc1	Ctgf
Spag5	Rnd3	Phlda1	D10Wsu102e	Hsdl2	Adck5	Prpsap1	Clpx	Acat2	Socs2
Unc119	Acot8	Glyctk	Rnf185	Plin2	Gpihbp1	Chdh	Lpl	Mrpl14	Ddit4
Rab34	Tnfaip1	Cdc34	Xbp1	Cpt2	Tymp	Celsr1	Tab2	Cdh2	Egfr
Ccne1	Rab11fip4	Pdia6	Arsg	Epb4.1	Dirc2	Stard13	Amdhd1	Isoc1	Mknk2
Rhoc	Slc12a4	Nbas	Id2	Mapre3	Eif4a2	Bik	Ppdpf	Cyb5	Irak3
Metrn	Gpx3	Srp68	Grhl1	Agpat9	Cela1	Plcg1	Lnx2	Lipa	Btg2
Dbf4	Smurf2	Slc35b1	Ftsj3	Sdsl	Csad	Rarb	Tmprss6	Mbl2	Igfbp1
Mdp1	Chd3	Dcakd	Slc13a5	A2m	Calcoco1	Slc12a7	Cd300lg	Papss2	Adcy1
Hltf	Rars	Gosr2	Rhbdf2	Gys2	Cyp4f13	Sgk2	Aldoc	Vegfb	Lpin1
Snrpd1	Ccl6	Scfd1	Sptlc2	Cidec	Abcg8	Erbb3	Pipox	Cyp26a1	Klf11
Cse1l	Cyb561	Sel1l	Gcnt2	Pex11a	Spry4	Anxa6	Afmid	Rbp4	Fbf1
Hdgfrp2	Slc35e1	Ptpn21	Nol8	Rab30	Cd74	Pip4k2b	Dhx58	Loxl4	Per1
Chaf1a	Dusp6	Wars	Ctsl	Fgf21	Tm7sf2	Pnpo	Cyb5r3	Hsd17b6	Nfkbia
Mcm2	Psen1	Ppp1r13b	Slc30a5	Rbpms	Pdcd4	Rad51l3	Shroom1	Shmt2	Hif1a
Cd36	Moxd1	Ssr1	Il6st	Pllp	Fn3k	Rab3d	Myo1b	Pnkd	4933426M11Rik
Ap2a2	Aifm2	Clptm1l	Vcl	Map1lc3b	Scd3	Grb7	Ypel2	Bok	Abcd4
Apoc2	Ppa1	Marveld2	Pspc1	Apoa5	Alas2	Lyst	Agxt2l1	Spp2	Fos
Cdkn1b	Cobl	Gdf10	Extl3	Nrg4	Cyp2e1	Hsf2	Tlcd1	F13b	Lrrc16a
Hmgn2	Rhbdf1	Ccdc25	Osmr	Slc25a20	Dhtkd1	Lin7a	1110001J03Rik	Steap3	Gadd45g
Elf3	Spnb2	Dnajc3	Ngdn	P2ry2	Gm4956	Cry1	Echdc1	Fcgr2b	Fam193b
Pafah1b2	Sdc1	Jub	Brix1	Mgll	Cyp27a1	Pbld1	Rhobtb1	Slc2a8	Acot12
Mob3a	Ubxn2a	Rai14	Txndc11	Ptplad1	Agxt	Tysnd1	Hal	Agpat2	Fam107a
Timm50	Adap2	Fam86	Litaf	Gde1	Pigr	Sgpl1	Pah	Abca2	Fst
Kif20a	Lrrc59	Slc52a2	Plec	Dak	Slc45a3	Osbpl8	Pbld2	Sord	Zc3h13
Dnase2a	Sec23a	Tfg	Thpo	Creb3l3	Upp2	Sumo3	Gamt	Bche	Scara5
Syce2	Srp54a	Sdf2l1	Tnfrsf12a	Hectd1	Gsn	Pfkl	Ddc	Gstm4	Slc39a14
Nob1	Serpina3n	Tfrc	Bysl	Tmtc2	Chac1	Mapk9	Cpeb4	Pmvk	Fam134b
Nqo1	Lgmn	Umps	Pim1	Tenc1	Bmp2	Rtn4	3010026O09Rik	Slc50a1	Slc25a32
Ruvbl2	Acot3	Ap2m1	Slc37a1	Inhbb	Fahd2a	Shmt1	Efemp1	Hadh	Mtss1
Bax	Eif5	Pdia5	Myl12a	Ralgapa2	Car1	Hnf1b	Fam20a	Enpep	Ttll8
Gstm3	Cast	Pigp	Ccdc86	Serpine1	Car3	Rabep1	Abca8b	Cd1d1	Slc38a2
B230120H23Rik	Glrx	Adcy6	Fas	Mat1a	Pcmtd2	Mink1	Map2k6	Fmo5	Retnlg
Dnmt1	Nr1d2	Parp3	Pdcd11	Atp6v0a4	Sucnr1	9030617O03Rik	Adi1	Cth	Tnk2
Psap	Arf4	Creld2	Ankrd2	3930402G23Rik	Accn5	Cdc42bpb	Cmpk2	Gbp2	Ets2
Tbccd1	Itih4	Slc17a9	Wdr45l	Rsad1	Tdo2	Tnfaip2	Rsad2	Aco1	Slc15a2
Coro1c	N6amt2	Rrp36	Nfkb2	Gabbr2	Ecm1	Zfyve21	Rnf144a	Aldh4a1	Rcan1
Chn2	Cpb2	Cnpy3	Sat1	Tmem120a	Uox	Zkscan3	Sntg2	2810405K02Rik	Nr4a1
Slbp	Tgm1	Mcfd2	Farp1	Rhbdd2	Npr2	1300014I06Rik	Slc46a1	Paics	Cdkn1a
Aqp1	Rnf19a	Yipf5	Nrp1	Ppp2r2d	Dyrk2	Ptch1	Acly	Ugt2b34	Ccrn4l
Cnn2	9130401M01Rik	Smad2	Raph1	Enc1	Cyp4b1	Tert	Stat5b	Sult1d1	Ivns1abp
Emr1	Tef	Osbp	Nop58	Arl15	Slc25a33	Ocln	Adam11	Aacs	Vegfa
Ap1s1	Myh9	Cdc42bpg	Trak2	Flad1	Hgfac	Samd8	Pygl	Cyp3a25	Sik1
Lbr	Rpap3	Syvn1	Casp8	Dpy19l1	Khk	Gm9746	Zfp36l1	Slc46a3	Lpin2
Plekha8	Polr3h	Pold4	Mki67ip	Synpo	Cxcl9	Hacl1	Slc10a1	Irf5	1600002H07Rik
Spc25	Grina	Bad	Uck2	Tmem82	Hpd	Sh3bp5	Akr1c6	Wbp1	Epas1
Prlr	Cpox	Hhex	Kctd3	Ddx28	C8b	Efha1	Akr1c12	Usp18	Dusp1
Msh6	Igsf11	Dntt	Mmadhc	Inhbe	Hibadh	Tsc22d1	Akr1c13	Slc6a13	Fkbp5
Nid1	Tmem41a	Dclre1a	Lass6	Fitm2	Nat8	Bmp1	Slc17a4	Ptms	Cabyr
Mcm5	Btg3	P4hb	Clp1	Hamp	Mug2	Cldn1	1110018J18Rik	Slco1b2	Ptpn2
Pafah1b3	Tmem50b	Erlin1	Arhgap1	Ctif	Scnn1a	Nudt16l1	Dapk1	Fkbp4	Mbd1
Asf1b	Ifngr2	Esyt1	Tpd52	Lgals4	2810007J24Rik	Itgb5	Srd5a1	F7	Nedd4l
Ddx39	Slc11a2	Sigirr	Fabp5	Retsat	Slc27a5	Gpd1	Pdhb	Proz	Rcl1
Dnajb1	Krt18	Pdia4	Ptpn1	Elmod3	Nox4	Gtf2ird1	5730469M10Rik	Agpat6	Pik3ap1
Trim28	Cxcl13	Pdgfa	Eif6	Gm10032	Plekhb1	Kcnk5	Ctsb	Hpgd	Got1
Ctr9	Serinc2	Myo5b	Ppm1l	1300010F03Rik	Syt3	Pisd-ps2	Cryl1	4931406C07Rik	Dnmbp
Snx6	Trip6	Tram1	Plrg1	Irak2	Acadsb	Tiam2	Tkt	Aplp2	Rabgef1
Mthfd2	Slc22a3	Kdelc1	Pla2g12a	Tor3a	Pdilt	Enpp5	Lect1	Sc5d	Crcp
Ranbp1	Enpp4	Dnpep	Gar1	Ddhd2	Otc	Prkd3	Itm2b	Fam55b	Asl
Sqrdl	Man2a1	2810459M11Rik	Gpatch4	Gm6055	AI316807	Itfg3	Fam158a	Tmem218	Bach1
Gata6	C3	Rnpepl1	Gtf2b	Mppe1	Ido2	Phf1	Cmbl	Rbpms2	Fam195a
Reep5	Nars	Ralgps2	Ugcg	Tmed5	Irf2	Svil	Ropn1l	Cmtm6	Coq10b
Tuft1	Prrc1	Nmt2	B4galt1	Slc22a21	Ces1f	Dsc2	Tars	Pth1r	Cps1
Tpr	Pcsk5	Fmo4	Ctps	Cyp4a32	Nudt7	Slc23a1	1110020G09Rik	Amt	Ptp4a1
Clint1	Ddb1	Dolpp1	Ncdn	Snora75	Lipc	Stard4	Dpys	2810474O19Rik	Il1r1
Crip2	Pcx	Fam73b	Gnl2	SNORD58	Rora	Npc1	Hrsp12	Gng11	Tm4sf20
Crip1	Minpp1	Hspa5	Eya3	SNORA33	Elovl5	Atat1	Col14a1	Faah	Cln8
Elovl1	Plce1	Dnajc10	Yrdc	Acot1	Me1	Nr3c1	Deptor	Gulo	Gin1
Cdc20	Sorbs1	Pdia3	Nol9	Gm15441	Cdo1	D18Ertd653e	Enpp2	Dpp4	Nek7
Srm	Trim8	Sec23b	H6pd	Pde4d	1810031K17Rik	Atl3	Ndufa6	AI182371	Pfkfb2
Rbm14	Gyk	Serp1	Stx18	Thbd	Sdr42e1	Slc25a45	Bcl6	Igfbp7	Rgs16
Ptbp1	Flnb	Ssr3	Slc34a2	AL672259.1	Dsg1c	Acy3	Gpt	Aldh8a1	Atp1b1
Mvd	Cd63	Sec22b	Crybb3	Nlrp12	Cebpa	Rce1	Mpv17l	Gch1	Atf3
Cyba	Agap2	Ints3	Cxcl1	Wdr92	Ugt2a3	Smarca2	Nit2	Susd4	Fam107b
Ihh	Bet1l	Dnajb4	G3bp2	Serpina3m	Ugt2b1	Esrra	Hgd	Akr1d1	Pfkfb3
Cdt1	Tspan4	Them4	Sdad1	Tlr5	Slc17a2	Gpam	Clcn2	Ephx1	Slc25a25
Aprt	Wdr73	Manba	Atp2a2	Gm15035	Macrod1	Add3	Dopey2	Ttc36	Gpd2
Pola1	Nudt5	Cc2d1b	Prkab1	Gm12840	H2-Aa	Lrrc45	Soat2	Mocos	Il1rn
Gmnn	Acadl	Lrrc42	Actb	4933421A08Rik	Fzd8	Rfng	Igfbp6	Slc44a3	Slc43a1
Cdk4	Dst	Ppcs	Ung	1300015D01Rik	Scd1	Abcc2	Rgn	Maob	Gpcpd1
Sulf2	Fn1	Lepre1	Gcc1	Acad11	Mxd4	Fyco1	Sult1c2	Fmo1	Il1b
Vars	Gpr39	Gale	Etv6	A930033H14Rik	Hsd3b5	Tbl1x	Mx2	Ccbl2	Il1a
Clic1	Cfh	Pqlc2	Thumpd3	Gm4673	Gstp2	Mettl7b	Slc29a1	Blvrb	Pck1
Lsm2	C4bp	Ddost	Tnfrsf1a	Serpina3e-ps	Bphl	Baiap2	Glo1	Limd2	Tbl1xr1
Pole	Acbd3	Inpp5b	Mphosph10	Gm20419	AI317395	Inhbc	Ndufv3	Sepw1	Skil
Tinf2	Apcs	Ski	Pik3c2a	Gm20400	Elovl3	Pstpip2	Cbs	Cd1d2	Smad9
Rad51c	Lpgat1	Dvl1	Rab6a		Pdk2	Eps8l2	Ehd3	Gck	Tsc22d2
Arpp19	Lamb3	Gltpd1	Fus		Ube2h	Cbx2	Hagh	Bag2	Ccnl1
Khsrp	Hsd17b7	Fam114a1	Bag3		Tspyl4	Fam20c	Cyp4f14	1110067D22Rik	Il6ra
Hnrnph1	Nek6	Sel1l3	Tacc2		Cyp7b1	Slc40a1	Zfp871	Notum	Tlr2
Arid1a	Lcn2	Cdk2ap1	Arfip2		Baat	Ormdl1	C2	Insig1	Abcd3
Abhd8	Tor1b	Hnf1a	Rrp8		Cpeb2	Stat1	Lims2	Akr1e1	Trp53inp1
Fgfrl1	Tor1a	Erp29	Rps6ka3		Bmf	Ctdsp1	Aqp4	Glb1	3110043O21Rik
Fbxw9	Crat	Ephb4	Adam9		Lyrm5	Igfbp5	Ttc39c	Lrrc8d	Aldob
Sertad1	Prrg4	Epha1	Rwdd4a		Ltbp4	Tuba4a	Keg1	Slc25a23	Ppap2b
Carhsp1	Ehd4	Gfpt1	Bcmo1		Apoc1	Ngef	Gldc	BC029214	Slc6a9
Nutf2	Slc20a1	Tgfa	Nip7		Tmem205	Rab17	Chka	Rell1	Tnfrsf1b
Ncaph2	Atp9a	Mogs	Tirap		Lrit1	Epb4.1l5	Acsl5	Agmo	Mfsd2a
Cd163	Wwtr1	Copg	Zfp259		Pklr	Tmem9	Cyp2c55	Slc25a44	Plk3
Dynll1	Nras	Rpn1	Nnmt		Gpr110	Rassf5	Cyp2c40	BC004004	Map3k6
Pdcl	S100a11	Sec61a1	Plscr1		Serpina12	Ahctf1	Gsto1	Aldh1a1	Errfi1
Dqx1	Fga	Creld1	Snhg5		Slco1a1	Capn2	Sirt7	Aes	Fosl2
Ube2g2	Alpk1	Nucb2	Cish		Acacb	Tmem63a	Fasn	Akr1c20	Ppargc1a
Met	Fubp1	Bckdk	Amigo3		Cyp2c37	Ppp2r5a	Hoga1	Ece1	Klf3
Slc16a12	2810403A07Rik	Nomo1	Mctp2		Hps4	Irf6	Cyp2c44	Itpk1	Slc10a6
Cbx5	F3	Ubfd1	Alas1		Ypel3	Plxna2	Scd2	Fdps	Rasgef1b
Nuak2	Lphn2	Oraov1	Slc16a1		D130020L05Rik	Pter	Sema4g	Iah1	Brap
Ifrd2	Ctbs	Tmem184c	Kdm4a		Lrit2	Acbd5	Dnase1l3	1110001A16Rik	Ulk1
Slc38a3	Decr1	Gse1	Palmd		Gls2	St6galnac6	Car5a	Gpx1	Sds
Raver1	Cyp4a31	6430548M08Rik	Ddx19b		Slc15a5	Sh3glb2	Paox	Rdh11	Aass
Tmem86a	Cyp4a14	Hyou1	Smyd5		Ccbp2	D730039F16Rik	Irf7	Slc22a7	Pole4
Rbm25	Cda	Stt3a	Sf3b3		Serpinb1a	Ifih1	Tmem14a	Rdh16	Rab43
Fads1	Alpl	Dpagt1	Usp36		Cirbp	Pkp4	Gsta3	Gm6020	Bhlhe40
Cars	Mtap7d1	Yipf2	Tnks1bp1		Col27a1	Fbxo3	Lactb2	Akr1c19	2210411K11Rik
Phlda2	Per3	Sh3bgrl2	2310044G17Rik		Zfp36l2	Impa1	Idh1	Plekhf1	Csrp3
Vac14	Mtor	Tmed3	Chchd4		Gm5424	BC006779	Npas2	Adh1	Cyp2b10
Snapc2	Rint1	Ppib	Slc41a2		0610008F07Rik	1810062G17Rik	Ogfrl1	Clec4g	Kctd15
Brms1l	Ccnl2	Stt3b	Zyg11a		1700001C19Rik	Cyp2u1	Pecr	BC089597	Nfkbib
Kif11	Eif2b4	Nme6	Tdg		Odf3b	Lrat	Serpine2	Sepx1	Lyve1
Rpa3	Cgref1	Srprb	Nostrin		Arl4a	Sh3d19	Mr1	Raet1d	Praf2
Mlkl	Sult1e1	Uba5	Baz1a		Atg16l2	Bcar3	Adck3	Gm17131	Slc25a15
E130303B06Rik	Uso1	Manf	Rrp12		A930001N09Rik	Gclm	Dpt	Gm3571	Rab20
Cad	Camkk2	Inppl1	Mid1		Bmyc	Rorc	Slc30a10	AL808021.1	Dusp4
Pea15a	Rbm19	Hspa13	Nfkbiz		Rarres1	Cyp7a1	Mcm10	Gm5873	Slc7a2
Ehmt2	Cyp3a13	Fkbp1a	Shq1		Suox	2610029I01Rik	Mrc1		Gpt2
Elof1	Asns	Gmppa	Prdm4		Grem2	Nudt2	Kynu		Mt2
Rnf168	Cald1	Phldb2	Sbno2		Ces2b	Prkaa2	Fcna		Mt1
Klhl3	Calu	Gstt2	Pawr		Nudt6	2610528J11Rik	Hnmt		Fbxo31
Cacybp	Trim24	Arhgef5	Apex1		Scd4	Slc2a1	Zfp385b		St3gal4
Map3k4	Slc37a3	Rbfox2	Clcn7		Cyp8b1	Trit1	Abcb11		Slc37a4
Clec4f	Reg3g	Lgals3bp	Nop14		Cml3	1110049F12Rik	Cat		1700017B05Rik
Csf1	Slc41a3	Ogt	Eif2c2		Irf2bp2	Extl1	Cd82		2300009A05Rik
2310061C15Rik	Itpr1	Zfc3h1	Zfp146		Slc22a30	Sytl1	Ivd		Trib1
Dll1	Erc1	Ccnd3	Itih2		Cyp2f2	Casp9	2010011I20Rik		Myd88
Galns	Plbd1	Rnf43	Icam1		Iigp1	Arhgef19	Chrna4		Csrnp1
Unkl	Sec13	Agpat1	Tgm2		Lifr	Prkag2	Acss2		Acpp
Actn1	Ltbr	Mfsd7c	Nufip2		Fabp1	Slc2a5	Slc2a2		Ablim3
Hmgb3	Tspan9	4933407C03Rik	Zc3h7a		Kcnn2	Ctnnbip1	Aadac		Slc35a4
Nipsnap3b	Pzp	Tmem30b	Nop2		5033411D12Rik	Mad2l2	Tm4sf1		Pank1
Ubl4	Psmd8	Mtrr	Snx10		Ces2a	Prkcz	Mme		Klf9
C4a	Mvp	Klraq1	Tsr1		Ghr	Klb	Hsd3b6		Tiparp
Atf6b	Aldoa	Ttyh2	Nos1ap		Izumo4	Fam69a	Bdh2		Dusp5
Hspa8	Sult1a1	Ccdc122	Rpf2		Hsd3b4	Rufy3	Ddah1		B3galt1
Pdzd11	Hpx	Glt25d1	Pcid2		Hamp2	Rassf6	Gbp3		Rps29
Anp32e	Lhpp	Ankrd27	Creb3l2		Inca1	Eln	1300002K09Rik		Dopey1
Nfe2l2	Ccdc120	Rtkn	Stap2		Cml1	Agfg2	Ptprd		Fam124a
Cd5l	Flna	Vat1	Ythdf1		Cyp2d12	Pcyox1	Slc44a1		1810055G02Rik
Ncapg	Morf4l2	Egln3	2610034B18Rik		Aadat	Slc6a6	Pde4b		Leng8
Il17rb	Gas6	Spcs2	Isg20		Ugt2b37	Tmcc1	Angptl3		Midn
Lonrf3	Col4a1	Foxa1	Dnttip2		Mup5	Clec2d	Fggy		Pim3
Dyrk3	Ppapdc1b	Alg12	Dnajc11		Gckr	Rassf8	Mycl1		Lysmd3
Pacsin2	Fgl1	1810006K21Rik	Kmo		Mug1	Dennd5b	Pdzk1ip1		Agphd1
Ttll12	Hp	Cc2d1a	Mrap		Ces4a	Rhpn2	Tmem50a		Rusc2
Etaa1	Arl2bp	Dna2	Saa4		H2-Eb1	Nr2f2	Mthfr		Gadd45a
Brca1	Jak3	Ttc7	Bcor		Gstp1	1110006G14Rik	Ociad2		Fgf1
Ccdc56	Dus2l	Lrfn3	Mybbp1a		H2-K1	Cyp2r1	Sult1b1		Decr2
Traf4	Bmper	Tfb1m	Efhd2		Cyp2d22	Pde3b	Hsd17b11		Arhgef26
Cdc6	Srpr	Lrrc20	Foxa3		Ttr	Lcmt1	Tpst2		Taf2
Suz12	Apoa4	Il22ra1	Wdr43		Ugt2b38	Rnf141	Alb		Ccdc21
Atad5	Tagln	4930444A02Rik	Ripk2		Ces1e	Prss8	Afm		Arid5a
Birc5	Bace1	Slc30a1	Elovl6		Lcn13	Bcl7c	Ccng2		Klf10
Wfdc2	Arcn1	Uggt1	Rrp9		Ces3b	Bcat2	Slc15a4		Atoh8
Myo1c	Treh	Mavs	Hspb8		Cyp2c67	Pgap2	Pxmp2		Jmjd1c
B4galt5	C2cd2l	Inf2	D11Wsu47e		Klhl24	Magix	Tfpi2		Dusp8
Hnf4a	Rp9	Gnpnat1	2010003K11Rik		Cyp26b1	Efnb1	Frmd4b		Socs1
Uchl5	Irak1bp1	BC016495	Mkl1		Slc22a28	Magt1	Abtb1		Trp53inp2
Pfn1	Idh3a	Tapbpl	Gnl3		mt-Tq	Phka2	Klf15		Txnip
Kpna2	Tpm1	Slc22a23	Fam59a		mt-Ts1	Abcd1	Aldh1l1		Egr1
Srsf1	Nck1	Pcp4l1	Id1		mt-Tt	Fam3a	Gabarapl1		Gdf15
Mtmr4	Nktr	Gmds	Pde12		Mir122a	Dlc1	Mgp		Pptc7
Slc13a3	Gtf3c1	Mesdc2	Gm8399		Mirlet7d	Nr3c2	Dera		Gm9766
Trim37	Srxn1	Atf5	Gpr146		Mir27b	Gab1	Clec2h		Baiap2l1
Phf23	Slc10a3	Capn8	Alkbh2		U6	Txnl4b	Psd3		Irs2
G3bp1	Gm6685	Fam65a	Trim39		Mir23b	Mmp15	Gas2		Ppp1r10
Sparc	Atp1a1	Ptpn3	Pid1		Mirlet7c-2	Gtl3	Dgat2		Thbs1
Cbx1	Kctd17	Ost4	Tifa		mt-Nd4l	Ntpcr	Aqp8		Ppp1r15a
BC096441	Fam160b1	Bpgm	Cltb		Cyp4a12a	Bcar1	Vkorc1		Sgms1
Cd68	Cml2	Plcl2	Syt12		Mup21	Sesn3	Abcc6		Abcg5
Avpi1	Qsox1	Cables2	Heatr1		Mup3	Pvrl1	Acsm5		Rad54l2
Irf1	Ucp2	Anpep	5730508B09Rik		Gm6265	Oaf	St5		Slc25a34
Pelp1	Fgb	Rreb1	Tmem125		Cyp2c54	Rdx	G6pdx		Phf8
Ywhah	Fgg	Rpl22l1	Rtn4rl2		Cyp2d11	Dixdc1	Tsc22d3		Fam35a
E2f2	Gas2l1	Atp8b1	Gan		Cyp2d9	Tyk2	Adrb3		Serpina3g
Plod1	Caskin2	Fnbp1l	Cpne8		Cd59b	Ldlr	Klkb1		Slc16a6
Ccl9	Ly6d	Tax1bp3	Jun		Cry2	Kank2	F11		BC057022
Isyna1	Grn	Cdk6	Socs3		Gstm6	Aqp9	Herpud1		Tmc7
Mdh2	Gnat1	Scamp5	Bcl3		Selenbp2	Clk3	Mast3		Gm5617
Rnf145	Cog3	Iqcc	Grwd1		Ces3a	Adamts7	Pde4c		C130039O16Rik
Scn1b	Sidt2	Ostc	Sh3bp2		Gm12966	Parp16	Hsd17b2		AA986860
Chtf18	Ints6	Tspyl2	Pprc1		Serpina1d	Scap	Ces2d-ps		Maff
Tmem129	Pdzrn3	Ssr2	Cep170		Gm10319	Dclk3	Ces2e		Arrdc4
Psmc3ip	Cerk	Amot	Eif1a		Ubxn1	Gorasp1	Cyb5b		Zc3h12a
Zfp687	Ibtk	Rhod	Gm12715		Ugt3a1	Nudt16	Acad8		Hilpda
Calm3	Gatad2a	Pkp2	Max		Serpina1e	Kank1	Abcb10		Leng9
Rcn3	Gramd1c	Pigs	Eif4a1		H2-Ab1	Snx33	Fdx1		Tmem20
Slc6a8	Tbc1d24	Ikbke	Trmt61a		Cyp4f15	Pdxk	Bco2		Foxo1
AI428936	Dnajc12	Krtcap2	Rrs1		Gm1614	Arap1	Dock6		Zbtb7c
Esr1	Spryd3	Sbk1	Stk19		Mup14	Acsl3	Myo1e		Zfp612
Fbxo5	Lrg1	Upf2	Nol10		Mup15	Fbxo21	Anp32a		Slc38a6
Cep57l1	Ddx1	Crb3	Dot1l		Mup11	Pfkm	Cyp1a2		Zfp36
Tube1	Vnn1	Gm1821	Actg1		Gm16002	Cdc14b	Cyp1a1		Shb
Prep	Crp	Pard6b	Ldha		Mup12	Slc35d2	Gsta4		Niacr1
Perp	Chpf2	S1pr5	Nupl1		Mup-ps2	Ptprf	Gclc		Adrb2
Hebp2	Susd1	Nudt18	Rnu73b		Mup7	Lpar6	Slco2a1		Mcart1
Qrsl1	Tmem214	1190002N15Rik	Snora41		Cib3	Map3k13	Ip6k2		Scand1
Aim1	L3mbtl3	Ccdc149	SNORD51		Ceacam1	Foxn3	Cd59a		Yod1
P4ha1	Fam102a	Ermp1	SNORD58		Gm10681	D930015E06Rik	Trib3		Cldn14
Sept10	Orm1	Zfp322a	snoZ40		Gm2058	Asb13	Abtb2		Nr1h4
Lims1	Abhd2	Unc119b	Snord58b		Ass1	Pqlc1	Slc24a6		Gm8566
Zwint	Sec24d	Ccdc66	SNORD18		Trbd1	Tpst1	Gas7		Pdp2
Dcn	Fndc3b	Gltpd2	Snord73a		Ighm	Hdac11	Rnf125		Tob2
Cdk1	Picalm	Zfp768	SNORA62		Snord89	AI661453	Rtp4		D4Bwg0951e
Tmpo	Sec24c	Mlec	SNORA32		Cyp4a12b	Parp14	Spata2l		Insc
Epb4.1l2	Rcan2	Zfp710	SNORD83		G6pc	Zfp707	Akr1c14		Slc25a47
Fam54a	Alg2	Mterfd3	SNORA18		Mup20	Zfp395	Sfxn5		Rapgef4
Snrpf	Rapgef1	Zfp219	Snora34		Mup19	Daam1	Slc16a2		Chchd10
Ccar1	Saa3	Dtx3l	SNORA71		Mup18	Oma1	Nipsnap1		Spty2d1
Slc16a7	Irgq	Zfpm1	SNORA25		Mup16	Fam176a	Uroc1		Rlf
Slc1a4	Dmxl2	Zfp161	Snord49a		Mup-ps8	Tdrd7	Ifit1		Rasd1
Mdm2	4930506M07Rik	Zbtb12	Snord16a		Mup-ps7	Ugt2b35	BC031353		Apol10b
Csrp2	Mfsd6	Dcun1d4	Xpo5		Mup10	Polr3g	Tjp3		Gja4
Mdm1	Golt1a	Spats2	Ell		Mup1	Zhx3	Arl4d		Ppp1r3g
Slc36a1	Tram2	Krcc1	Fat1		Mup9	Ttc38	Galm		Gm9846
Xpo1	Lad1	0610007L01Rik	Snora33		Mup8	Tmem63b	Thrsp		Hist1h2ba
Ccng1	0610010F05Rik	Exoc6	Srsf3		Mup2	Sigmar1	Isg15		Atp5k
Nudcd2	Pelo	Txlna	Tut1		Mup6	Hist1h1c	Acss3		Gm9847
Hmmr	Abcb4	Arfgap3	Zfp9		Gm11128	Ppfibp2	1810046K07Rik		2900026A02Rik
Hnrnpab	Mustn1	Spcs3	Gm10506		Snord98	Slc38a7	Galt		Cd14
Cnot6	Gucy2c	9130219A07Rik	Kti12		Mup-ps17	Eepd1	Slc17a3		Hist1h1e
Rad50	Wdr74	Usp46	Nlrc5		Gm13775	Tssc1	Colec12		Klf13
Cdkn2aipnl	Onecut1	Commd5	Ap1ar		Mup-ps9	Mgat4b	Rfxank		Rnf103
Vdac1	Edem3	Sertad3	Gm6166		Gm13131	Entpd8	Leap2		Junb
Smtn	Gm6741	Rras2	Actg-ps1		Mup-ps14	Slc35b2	Fam82a1		Fbxo31
Myl7	Ptpn11	Fez2	SNORD50		Mup-ps10	9430023L20Rik	Btg1		3110082I17Rik
Pold2	S1pr2	Ppp1r14b	SNORD50		Mup-ps18	Aagab	Colec11		Ier2
Dbnl	Als2cl	Gm10030	SNORD50		Mup-ps13	Tbcel	Prodh2		Uck2
Ccdc117	Gm7334	Sept11	SNORA66		Mup-ps19	Ldlrap1	D4Wsu53e		Lipg
Fam33a	D1Ertd622e	Palld	SNORD101		Mup-ps6	Paqr7	Shank2		Rhob
Prr11	9330133O14Rik	Tmed9	Snord65		Mup-ps1	Spon2	Wdtc1		Zfp771
Tubd1	Cyb5d1	Gcap14	SNORD12		Ctsf	Tob1	Aspg		Klf2
Acaca	Preb	Nap1l1	SNORA40		Mup-ps15	Nr0b2	Cisd1		Tead1
Nampt	Slc16a5	Sip1	Snord83b		Mup-ps20	Prosapip1	Ppm1k		Tns1
Hs1bp3	Onecut2	Sntb1	Gm12355		Mir1898	Fam13a	4933403F05Rik		D830050J10Rik
Smc6	Gjb2	Slc38a10	Gm7694		2210403K04Rik	Adh4	Scarf1		Klhl25
Apob	Golph3l	Ptpla	Snord100		Gm12909	Rara	Tlcd2		S100a8
Rrm2	Cdc42se1	Chd4	Gm14387		4732419C18Rik	Dexi	Fam198a		S100a9
Sh3yl1	Fam187b	2210021J22Rik	Gm15453		2310001H17Rik	Rnf144b	Mical2		St3gal5
Cdc27	Tapt1	U2	Eif4a-ps4		Gm13824	Kdm1b	Car14		Npm3
Rnf135	Zfp445	Zfp825	Gm15502		Gm12718	Snrk	Colec10		1810011O10Rik
Slc9a3r1	Cltc	Gmppb	Ldha-ps2		Gm13773	Plekhg6	Cyp3a16		Cebpb
Hn1	Cd24a	Rnf121	U6		Gm15564	Rilp	Angptl6		Cep110
Sumo2	Cldn2	Pgap1	Gm15344		B430119L08Rik	Pdzk1	Nlrp6		Gm10036
Nup85	Cd3eap	Eef1g	Gm11974		Gm13194	1700066M21Rik	9130409I23Rik		Serpina3k
Slc25a19	Ubiad1	1810009A15Rik	Gm11963		2410006H16Rik	Sesn1	Echdc3		Hist1h2bg
Galk1	Amigo2	Fam84b	SCARNA20		Gm16124	Sgsm2	Nrn1		Gm5582
Trim47	Vps37c	Gdf2	SNORD125		1500017E21Rik	Hfe2	Camk1d		Gm8129
Cygb	Rnf24	Pgap1	Gm6493		2410004N09Rik	Hdhd3	Il18		Hopx
Kif1c	Armcx3	2610002J02Rik	Gm17077		Gm11773	Spsb2	Mreg		Gm10063
Vmo1	Dcaf5	Sdhaf1	9430037G07Rik		U6	Parp12	Tmem135		Rps26-ps1
Dhrs13	Cdc42ep1	BC029722	Snhg1		Nat8b	Rassf7	Dcxr		Atl2
Cpd	Slc35c1	Gm13597	Snora24		Gm15796	Polr3k	6430573F11Rik		Tnip2
Luc7l3	2610019F03Rik	U6	Mir3057		Mup17	Degs1	Ccbl1		H2afj
Aurkb	Gimap9	Gm12184	AL646020.1		Gm4477	Josd2	1810049H13Rik		Cend1
1500010J02Rik	Fam83a	1110065P20Rik	AC122359.1		Mup13	Ptk6	Cited2		Rps10-ps1
Myh10	Tmem199	Sec61g	AC163694.1		Gm6907	Ralgps1	Pion		Gm10086
Krt19	Msrb3	Kdelr2			Gcnt4	A230050P20Rik	4833442J19Rik		Gm13363
Top2a	Gm9853	Gm4204			Gm17676	Muted	Dtx4		Taok3
Tmem101	Cmtm4	Maea			Sco2	C130074G19Rik	Pnrc1		Gm17132
Eftud2	Apon	AC160543.1			Serpina4-ps1	Tcta	Rdh7		Gm5805
1110034A24Rik	Slc39a1	Gm13509			AC166252.1	Lmbrd2	Apobec1		Gm9154
Pole2	Acot4	Esrp2			AC166252.2	Dnajc28	Cmtm8		Rps4y2
Pnn	Kcnt2	Gm15638				Ypel5	Pde9a		Cdc42ep5
Zc3h14	Jam2	Gm13421				Arhgap29	N4bp2l1		Crem
Polr2h	Ficd	Plcxd2				Trim14	Car8		Srrm4
Fut8	Plxnb1	5S_rRNA				Dag1	Cldn5		Hist1h2bh
Vrk1	Mat2a	U6				Cbx4	A2ld1		Hist2h2aa2
Plek2	Nanp	Gm10177				Sdr9c7	Pnpla3		mt-Ta
Erh	Slc30a7	0610007N19Rik				Rgl3	Bbox1		mt-Tn
Cdca7l	Tmem62	Eid1				Ddx58	Gpr155		mt-Atp8
2610021K21Rik	Cadm4	Gm17517				Trim7	Oasl1		Snora73a
Ifi27l2b	Adh7					Ppp1ca	Abca8a		Snord49b
Akr1c18	0610012H03Rik					Spns2	Abhd14b		Snord37
Net1	Pgm3					Necab1	Bhmt2		SNORD18
Entpd5	Prelid2					Slc19a2	Abhd14a		SNORD38
0610007P14Rik	Saa2					Fzd7	Anubl1		SNORD20
Hsp90aa1	Lepr					Nthl1	Pm20d1		Snord45b
Fdft1	Spna2					Eif2c1	Nxt2		Snord14a
Xrcc3	9530008L14Rik					Slc39a11	Hsd3b7		SNORD59
Trim27	Chsy3					Bivm	Selk		snoZ39
Slc17a1	BC017612					AW549877	Trafd1		Snord104
Elovl2	2010107H07Rik					Slc35e2	Hebp1		Snora31
Tpmt	Hadhb					Tnfrsf14	Fam46c		SNORD24
Dek	Flot1					Ctf1	Defb1		Snora73b
Cenpp	Dbp					Atxn2	Abca6		SNORD16
Ly86	Acnat2					Zfyve1	Arhgef37		Mir186
Cdk20	Ifitm2					Aqp11	Gprin3		Mir7-1
Mxd3	Slc4a4					D0H4S114	Lrtm1		Mir192
Prelid1	Orm2					Fam89a	Serpinb9		Mir194-2
Pdlim7	Serpina10					Ppp2r3a	Gvin1		SNORA14
Cxcl14	Flot2					Tmem64	C2cd2		Snora69
Cetn3	Gmfb					Hscb	Bst2		SNORA5
Lect2	Fabp4					1190005I06Rik	Ppp1r3b		SNORD45
Golm1	Tlr12					Vwce	Irgm1		SNORD103
Trip13	Timm17a					Orai3	Nqo2		U6
Cep72	Zfp167					Fam109a	Zfp295		Gm10157
Tppp	Brpf3					Marveld1	Gjb1		Serpina3c
Hapln1	Ano6					P2ry4	Omd		Serpina3f
Hexb	Paqr9					Dsg2	8430408G22Rik		Gm10263
Polk	Chi3l1					Rin3	Foxo3		Zbtb16
Hmgcr	Snord42a					Tnfaip8l1	Sephs2		Gm10180
Depdc1b	SNORA1					Fads6	Ugt3a2		Rps12-ps3
Plk2	Snora16a					S1pr1	Tmie		Frat1
Dhfr	SNORA4					Rtn4rl1	Glt1d1		Rps28
Nln	SNORA8					Fahd1	Lgr4		Rps25-ps1
Cenpk	Snora2b					5430407P10Rik	Adra1b		Rpl35a-ps5
4930452B06Rik	Cyp4a10					Wdr81	Arhgap42		2900097C17Rik
Glud1	Zfp810					Olfr1033	Gm11437		Gm10029
Dnajc9	Mllt4					Tcf21	Dock8		Gm3511
Anxa7	Ccdc134					Thtpa	A1cf		Hist1h2bf
Ap3m1	1700019G17Rik					Stard5	Isoc2b		Hist1h2bn
Ppif	Fbp1					Igfals	Asap2		Hist1h2bl
Pnp	SNORA57					AI464131	Raet1c		Gm10275
Rnase4	Il18bp					Camk2n1	Smagp		Zfp125
Rnaseh2b	Reg3b					Cxxc5	Sh3pxd2a		Hist2h3c1
Gata4	Csf2rb					Hectd3	Aldh7a1		Etnk2
Pinx1	Ang					Slc26a1	Rdh18-ps		Gm10309
F630043A04Rik	Srp54c					Khnyn	Cyp3a44		Jund
Diap3	Eme2					B3gnt1	A930005H10Rik		4732465J04Rik
Pbk	Fam169b					Rnf152	Thnsl2		Sowahc
Esco2	Saa1					BC025446	Gbp10		Map3k5
Clu	Gm10680					Samd9l	Mgmt		Cebpd
6720463M24Rik	Gm14327					Gm6484	Mettl7a1		Gm16439
Tnfrsf10b	Cerkl					Stbd1	Ugt2b5		Gm13826
Cln5	Snord72					F2r	Cyp2c50		Gm10443
Nup155	Gm14420					Dact2	Rnd1		Klhl21
Haus4	Gm11008					Hexim1	Arntl		Mlycd
Pabpn1	Srp54b					Agtr1a	Cyp3a11		Hist2h3b
Sdr39u1	Gm13552					Fzd4	Mettl7a2		Mafb
Myo10	Gm15694					Pgrmc2	Nfil3		Gm7120
Ywhaz	Gm6568					Lsm10	Ces1d		Gm10736
Rad21	Gm11212					Tmem220	Cfhr1		Gm4149
Shcbp1	Gm11843					Gpd1l	Ces1g		Spata5l1
Khdrbs3	Gm14416					Tmem123	Trim12c		Znhit2-ps
Sybu	Gm6939					Sgms2	Apol9b		Nrbp2
A1bg	Gm14421					Pddc1	Ces1c		AL645948.1
Sqle	SNORA19					Olfml1	Abat		Mir692-2a
Atad2	Gm15611					Mblac2	Gsta2		mmu-mir-689-2
Wdr67	Gm12195					Mafg	Gstm1		mmu-mir-2134-4
Gtse1	Slc39a1-ps					Rap2a	Wdr91		SNORA53
Rangap1	Gm16348					Lrrc3	Capn11		Snord64
L3mbtl2	Gm11695					Gnpda1	Thra		Snord69
Cby1	Wipf3					Tbc1d30	Pyroxd2		SNORA66
Fam118a	Gm8865					Tmem106c	Bckdha		Snord66
Srebf2	Gm11752					Cebpe	Cyp2c70		SNORA26
Nubp1	SCARNA21					D930048N14Rik	Ipmk		Snord71
Emp2	U6					Hook2	B2m		Snora68
Hes1	7SK					Repin1	Serpina6		SNORA3
Rogdi	2400009B08Rik					Gas1	Ppp1r1b		Snord4a
Gpaa1	Gm14435					Sh2d4a	Ces2c		SNORD91
Pycrl	Gm16332					Ndst1	Fmr1nb		Snord19
Naprt1	Tmem189					Tprkb	Hsd3b3		Gm15887
Ly6e	Gm3662					Dedd2	Acat3		A930039A15Rik
Lmf2	Gm17672					1600014C10Rik	I830012O16Rik		Bnip3
Alcam	Gm17462					Vmac	Kdr		Gm10973
Ccdc80	Gm2783					Dsp	Kif1b		Hsp25-ps1
Mcm4	Gm4511					Klhl5	Slc39a4		Serpina3i
0610037P05Rik	Gm17709					Rnf181	BC023105		Gm17566
Nde1	Gm17579					Tmem150a	Aox1		Rpl39
Rrn3	1110038B12Rik					Irs1	Mapk15		Rps19-ps7
Naa50	AC110211.1					Pgpep1	Hsd3b2		AL845466.1
Zbtb20	Mir3968					Acbd4	Ifi27l1		mmu-mir-1194
Dgcr8						Fam47e	Ethe1		Mir1198
Trmt2a						Ero1lb	Aox3		Rpsa-ps12
2610528E23Rik						Tmem140	mt-Rnr1		Gm7332
Ncbp2						Sphk2	mt-Rnr2		Gm14567
Nr1i2						Grlf1	mt-Ti		Rpl38-ps2
Fstl1						Cds2	mt-Tm		Rps24-ps3
Tra2b						Slc10a5	mt-Tw		Hist2h3c2
Cxadr						9630013D21Rik	mt-Ty		Gm14303
Ahsg						Sept9	mt-Nd6		Rpl18-ps1
Kng1						Ptk2b	mt-Te		Gm13086
Hrg						Suv420h2	mt-Tp		Gm16200
Rfc4						Kif13b	Snora28		Gm11874
Robo1						Gtf2i	U6		Gm11878
St6gal1						Olfr1034	U6		Gm12276
App						4921513D23Rik	Mirlet7b		Gm12013
Pros1						Fnip2	Dhrs3		Gm14801
Chaf1b						Cxcl12	Bhmt-ps1		H3f3a-ps1
Setd4						Ssbp3	Gm16551		Gm9703
Donson						Pvrl2	Klk1b4		Gm12630
2610039C10Rik						Atp11c	Hes6		Rps15a-ps6
Tuba1b						Pstk	H2-K2		Gm4459
Racgap1						Bcl9l	H2-T23		Gm15710
Lima1						Glyat	Ppp1r3c		Rpl3-ps2
Fabp2						Slc31a2	Cyp2d40		Gm15421
Slc10a2						Rtp3	Apol9a		Gm6977
Msrb2						Wdr6	Selenbp1		Gm15801
Rfc2						Blcap	Gm5096		SNORA42
Bsg						Xkr9	Spata22		Gm14539
Serping1						Spnb3	Prok1		Gm14097
Slc26a6						Zfp467	5830473C10Rik		Gm12265
Poc1a						Sort1	Ugt2b36		Snhg3
Tmem176a						Cgn	Gm10307		Gm16628
Tpi1						Ank3	Setdb2		6720401G13Rik
Pcbp4						Sat2	Gm4952		Gm12781
Cdca3						Irgm2	Mpst		Gm5970
Slc22a1						Fam149a	Mcc		Gm2788
Igf2r						Mfhas1	Klf12		Gm15835
Brp44l						Rnf213	Gm4951		Gm15287
Zfp54						Cldn3	Il11ra1		Gm15408
Smoc2						Mn1	Svip		Gm11827
Pkmyt1						Rbm47	Gm10639		E130102H24Rik
Cenpq						2510002D24Rik	Cox7a1		Gm11586
Sgol1						Gm10395	Cyp2a4		Gm16721
Hsp90ab1						D14Ertd449e	Bhmt		Gm14286
Polh						Vamp5	Gm10768		1200007C13Rik
Cyp39a1						Phldb3	Cyp2c68		SNORD19B
Ppil1						Gm10658	Ifit3		7SK
Tff3						Arrdc3	AW112010		U6
Ndc80						Gm10762	Ccdc162		snoU83B
Lbh						1810034E14Rik	Gm13443		mmu-mir-2134-1
Xdh						Cyp2d37-ps	AC163389.1		SCARNA4
Dpy30						Ept1	AC122119.1		U6
Crim1						Igkc	Gm13152		mmu-mir-2134-4
Qpct						Igtp	Gm4070		Scarna17
Srsf7						Prnp	Mup-ps4		U6
Twsg1						Pisd-ps1	Ifi47		SNORD5
Abca3						U6	Tgtp2		SCARNA17
Slc3a1						Ccdc85c	Tgtp1		SNORD63
Srbd1						Gm11789	Cyp4v3		Snora78
Mlst8						4930556M19Rik	Gbp6		snoU6-77
Pigf						Gm16024	Cml5		snoU105B
4930528F23Rik						0610005C13Rik	Gm11407		Gm15889
Spsb3						Gm15343	Gm14519		Gm16586
Hn1l						2610507I01Rik	Gm13339		Gm8783
Plin3						Gm16731	Gm13722		Gm16573
Mllt1						Gm15318	Gm12563		Eif4ebp3
Pkdcc						Gm12354	Gm16418		Gm4613
Polr2d						1700113A16Rik	Gm11967		Gm17024
Kifc5b						Marcksl1-ps4	Gm16639		Apold1
Tapbp						1810019D21Rik	Gm11832		Mcart1
Psmb8						2210417A02Rik	9030622O22Rik		Hist1h2al
Spata24						Gm16548	Gm15998		Gm10269
Rdbp						1700080G11Rik	Gm13522		Cyp4f17
Bin1						Gm11844	1110020A21Rik		Gm17498
Apom						AI480526	Gm11337		Neat1
Prrc2a						Adh6-ps1	Gm11266		Snord55
Aif1						1810064F22Rik	CT025701.1		Mir5133
Impact						Gm17586	Mir1948		CT010429.1
0610009O20Rik						1110054M08Rik	Mir1968		Mir5100
Tcerg1						Gm17386	U6		AL591584.1
Spink3						Gbp11	Ugt1a5		Mir3058
Impa2						RP23-89G22.3	Ugt1a1		Snord53
Snx24							Ugt1a9		Mir3060
Ppic							Mndal		Mir5102
Cep192							Gm17583		AC126942.1
Lmnb1							Gm17196		Snord87
Tcof1							F830016B08Rik		AL627182.1
Csf1r							Gm17251		AC131120.1
Psat1							Tstd1		AC124681.1
Cndp2							Gstm2-ps1		2610019E17Rik
Anxa1							Cyp2c69		Rpl41
Incenp							Cyp21a2-ps		AL645907.1
Fads3							Gm20319
Fads2							Mir5125
Tmem138							Mir5105
Fam111a							Mir5119
Fen1							Mir5109
Aldh1a7
Naa40
Ehd1
Sac3d1
Cdca5
Kif20b
Rpp30
Il33
Tjp2
Frmd8
Uhrf2
Rad9
Pola2
Banf1
Cdk2ap2
Aldh3b1
Efemp2
Lrp5
Rnaseh2c
Dnajc4
Stip1
Cep55
Hells
Cyp2c39
Aldh18a1
Sfxn2
Msr1
Habp2
Casp7
Ablim1
Arhgdia
Alyref
Stra13
Maged1
Arhgap19
Zdhhc16
Sectm1a
Mgea5
Hexa
Maged2
Pfkfb1
Abhd6
Acot9
Banp
Mmp19
Cdk2
Prim1
Nab2
Ddit3
Nnt
Tubgcp2
Cdhr5
Hras1
Cd151
Tmc6
Tk1
Phf6
Ccdc51
Prps2
Sdc3
Tyms
Hspa4l
Plk4
Itih5
Slc25a10
Rassf3
Homer2
Mybl1
Terf1
Slc39a10
Cflar
Sgol2
Col5a2
Col3a1
1700029F09Rik
Map4k4
Rev1
Stk17b
Obfc2a
Prim2
Rqcd1
Ppm1f
Bard1
Abcb6
Dnajb2
Itm2c
Ptma
Pde6d
Capn10
Dtymk
Scly
Serpinb8
Acmsd
Mcm6
Marco
Pkp1
Csrp1
Srgap2
Ube2t
Nucks1
Cyb5r1
Glul
Lamc1
Parp1
Fam36a
Pppde1
Nvl
Pycr2
Tagln2
Mpzl1
Nme7
F5
Cenpf
Nek2
Traf5
Dusp12
Uap1
Rgs5
Nuf2
Mgst3
Cenpl
Dars2
Vim
Mastl
Pdss1
Lrsam1
Fam129b
Col5a1
Hc
Stom
Dab2ip
Grb14
Lhx6
Gca
Brd3
Tmem141
2010317E24Rik
Uap1l1
Ssna1
Zmynd19
Ly75
Nup35
Hat1
Ssrp1
Dhrs9
Ube2l6
Med19
Ccdc34
Depdc7
Cstf3
Caprin1
Gatm
Myef2
Dut
Wdr76
Lrp4
Nusap1
4930402H24Rik
Rad51
Casc5
Cdc25b
D2Ertd750e
Pcna
Spred1
Mcm8
Crls1
Trpm7
Bub1
Nop56
8430406I07Rik
Csrp2bp
Gzf1
Gins1
Fam110a
Tpx2
Mapre1
E2f1
Aurka
Zbp1
Chmp4c
Car2
Gss
Dsn1
Rbl1
Rpn2
Fam83d
Actl6a
Ect2
Anxa5
Ccna2
Fam48a
Exosc8
Ift80
Tm4sf4
4930579G24Rik
Vangl1
Ptgfrn
Notch2
Gpsm2
Clcc1
Rab13
Tpm3
Efna1
Sass6
Olfm3
Larp7
Trim2
Snx7
Gstcd
Pdgfc
Papss1
Cks1b
Lmna
Pmf1
Iqgap3
Chd1l
Eif4e
Depdc1a
Cyr61
Asph
Ccne2
Fam92a
Tmem55a
Cpne3
Atp6v0d2
Odf2l
Smc2
Anp32b
Nans
Col15a1
Ambp
Orm3
Ptgr1
Alad
Pole3
Dnaja1
Ubap2
Enho
Fancg
Gne
Glipr2
Psip1
Ak4
Dph2
Cdkn2c
Ttc39a
Dock7
Usp1
Txndc12
Hook1
Laptm5
Gpx7
Tmem48
Pnrc2
Kif2c
Toe1
Nasp
Rad54l
Stil
Ak2
Rnf19b
Zbtb8a
Sfpq
Stmn1
Nudc
Hgf
Cdca8
Rpa2
Rcc1
Sf3a3
Xrcc2
Pgd
Lzic
Fam126a
Miip
Gnb1
Prom1
Man2b2
Ppm1g
Slc30a3
Emilin1
Pgm1
Anapc4
Cenpa
D5Ertd579e
Rfc1
Ugdh
Tmem165
Clock
Ppat
Cenpc1
Spp1
Plac8
Antxr2
Rfc5
Dck
Pf4
Shroom3
Kntc1
Stx2
Ran
Psph
1500011H22Rik
Anapc5
Chek2
Ints1
Tes
Snx8
Mmab
Aimp2
Arpc1b
Hsph1
Col1a2
Fam3c
Ezh2
Pcolce
Ppp1r35
Mcm7
Exoc4
Nt5c3
Fkbp9
Tmem176b
Tra2a
Zc3hav1
Cbx3
Zyx
Mad2l1
Agk
Anxa4
1700040I03Rik
Lrig1
Aplf
Nup210
Tmem43
Edem1
Tuba8
Wnt5b
Ccdc77
8430419L09Rik
Emp1
Atf7ip
Arhgdib
Slco1a4
Recql
Golt1b
Rad18
Kras
5730419I09Rik
Atp2b2
Cd9
Rad51ap1
Vasp
Pop4
C230052I12Rik
Snrpa1
Blm
Idh2
Ctsc
Tyrobp
2200002D01Rik
Pak4
Mfge8
Aen
Det1
4632434I11Rik
3200002M19Rik
Arl6ip1
Ipo5
Kif22
Maz
Nfatc2ip
Lipt2
Pold3
Nsmce1
Prkrir
2400001E08Rik
Plk1
Anks4b
Eri2
Oat
Fam53b
Rrm1
Mki67
Atp6ap2
Wee1
Rbm10
Rbmx2
Rbmx
Plp2
Rbm3
Vbp1
Msn
Hmgn5
Sh3bgrl
Cenpi
Serpina7
Acsl4
Cetn2
Nsdhl
Rbbp7
Ctps2
Haus7
Bgn
Pir
Piga
Hcfc1
Mpp1
Morc4
Atp11a
2410022L05Rik
Col4a2
Eri1
Gins4
Mak16
Gsr
Gtf2e2
Asah1
Sc4mol
Galnt7
Sap30
Sorbs2
Casp3
Mlf1ip
Slc25a4
Sall1
Aktip
Eif2ak3
Gins3
Tnpo2
Orc6
Zfp330
Mmp2
Cenpn
Ciapin1
Kifc3
Tpm4
Gins2
Cotl1
Ifi30
Mphosph6
Lsm4
Cdh5
Ces2g
Cbfb
Tradd
D230025D16Rik
Psmb10
Pla2g15
Smpd3
Mre11a
Wwp2
Taf1d
Tmem170
Ldhd
Usp2
Mpzl2
Chek1
Ilf3
Tmed1
Lysmd2
Smarca4
Sltm
Nedd4
Ccnb2
Mns1
Fam81a
Anxa2
Cln6
Phip
Kif23
Zw10
Tle3
Pkm2
Mpi
Fbxo22
Csk
Plscr2
Dapk2
Fam96a
Tipin
Zwilch
Smad3
Atr
Nt5e
Crtap
Tgfbr2
Mrps22
Cdc25a
Mtap4
Smarcc1
Trf
Topbp1
Gnai2
Traip
Prkar2a
Nicn1
Eml4
Folr2
Tpcn1
Troap
Cyp2c38
Fanca
Igdcc4
Pwp2
Rangrf
Nup93
C330027C09Rik
Pygb
Triobp
Lss
Abhd10
Dis3
Card10
Ttf2
Shf
Ttll4
Noc4l
Fbxl8
Fntb
Frrs1
Agl
2700078E11Rik
Fndc3a
Gtf2a2
Reep4
Rfwd3
Mnd1
Recql4
6330503K22Rik
Aspm
Rfc3
Tesk2
Fancd2
Kctd7
Srsf2
Loxl2
Polq
Gpc1
Slc25a37
Kif4
Iqsec1
Trim59
Kctd9
Brip1
Smc4
Neurl1b
Gcsh
Gm9761
Cybasc3
Uaca
Mad2l1bp
Hsd17b13
Papd7
2700049A03Rik
Zcchc11
Tmem109
BC030867
Dio1
Nup54
Plvap
Mfsd12
Cxcl10
Nudt19
Lrr1
Pip5k1c
Ncaph
Dhcr24
Mrpl54
Tmem106a
Ncapd3
C8a
Eef2k
Mtmr9
Gm6781
Plekhh3
Tubg1
Neu3
G2e3
Lin54
Lzts2
Nup37
4930547N16Rik
Ccl7
Ccl2
Klf16
Tmem98
Haus8
Fignl1
Mbd3
Tgfbi
Reep6
Aldh1b1
Tsen34
Melk
Alg8
Acta2
1500031L02Rik
Ddx11
3110052M02Rik
Rnf126
Cd276
H2-Q4
Tdp2
Fam122b
Parp2
Fmnl2
Zranb3
Gm98
Tm6sf2
Rif1
Ska1
Rbm43
9530077C05Rik
Siah2
Calm2
Lum
Cnot1
Ttyh3
Plxnb2
Nudt1
Man1b1
Cenpt
Aaas
Tubb4b
Kif15
Anln
Amdhd2
Ssx2ip
Lin37
Hspb6
C1qa
C1qc
C1qb
4921524J17Rik
Cnpy4
Tmem177
Pml
Trim3
Nxt1
Asap3
Wdr62
Foxa2
Dcaf15
Zcwpw1
Ppp1r14a
Tmem97
Tacc3
Srrt
Tbc1d2b
Ints7
4930427A07Rik
Dtl
Nenf
Bcdin3d
Dlgap5
Zdhhc18
Wdhd1
Cdkn3
Zbtb42
Cdkn1c
Ddhd1
Fermt2
Ckap2
Xkr8
H2afz
Rcor1
Sirpa
Ano10
2700029M09Rik
Igsf8
Haus6
Nod1
Als2cr4
Ncapd2
Edem2
Lasp1
Ttk
Rras
Foxq1
Tfdp1
Polr2l
Dcun1d2
Srd5a2
Gm129
Med30
Ctss
Pold1
Rtel1
Atp5j2
Nup205
Man2a2
Prc1
Txndc5
Arhgap18
Eme1
Stim2
Dap
Fanci
Metrnl
Srrm2
Suv39h1
Fn3krp
Pomt1
Megf9
Foxk2
Cdk5rap2
Igfbp2
Atp6v0e2
Exosc2
Neil3
Morc3
Ppl
Zdhhc2
Wfs1
Nup133
Mmd2
Lonrf1
Vasn
D2Wsu81e
Tbc1d13
Mrps6
2810408M09Rik
Htatip2
Exo1
Cc2d2a
Mcph1
Slc39a5
Alg14
Timeless
Stat2
Nup43
Bub1b
Hs2st1
Fmo2
Tmem194
2810417H13Rik
Emp3
Syngr4
Lrp1
BC052040
AI848100
Ggt6
Dgkz
Dom3z
Cblc
Ckap5
Gstm2
Abcb1a
Mis12
Ildr2
Tmem51
Pck2
BC048355
Cyp2b9
Mthfd1l
Hmgn1
Hnrnpul1
Snrnp25
AI314976
Chi3l3
Rcc2
Iffo2
Pif1
H2afv
Tmco4
Brca2
Rpusd1
Arhgap11a
Rbbp8
Inhba
Wrap53
BC055324
Pik3r1
Ccnb1
Kif14
Prelp
5730559C18Rik
Mrps27
Phlda3
Haus1
Mcm3
Ipo9
Rnpep
Mvk
S100a10
2310008H04Rik
Zbed3
Ncapg2
Arsb
Inpp5f
Cox10
Atf4
Adora1
C1galt1
Dctpp1
Tbc1d8b
Leo1
Clspn
Sun2
Asxl1
Cux2
Hirip3
Commd10
Wbp5
Exog
Serpinb6b
Upk3b
Tmem18
Tuba1c
Tmem186
Uevld
Otud1
E130012A19Rik
Pgp
Acpl2
Dpy19l3
Fam25c
Nup62
Gm5809
Zmym1
Irf2bp1
Arf6
Naa38
Cdc25c
Vsig4
Pcsk9
9030625A04Rik
1110002B05Rik
Camsap3
Gm9791
Dact1
Acp1
Hjurp
H1fx
Zfp367
Tubb2b
Hs6st1
Cenph
Tmem86b
Sowahb
Cenpe
Rbm15b
Gm9797
Plekha7
Mms22l
Tssc4
Gm9800
Paip2b
6330416G13Rik
Mtmr11
Sdpr
Snx12
Gm15428
Olig1
E2f8
Ankle1
Gm11223
Rbp1
BC046404
Ngfrap1
Hnrnpa1
Bdh1
D9Ertd402e
Gm7729
Rbm12b
Chtf8
Hmga1
Mpeg1
Ddit4l
Ckap4
Mars2
Zfp41
Nipa1
D030056L22Rik
BC048546
Mageh1
Gm7367
Tgif1
Mis18bp1
Fancb
Cdca4
Sstr2
Marcksl1
Timm8a1
Rbm15
Col6a3
Gm7204
Nags
Ckap2l
Lhfp
Cyp4f16
Gm5593
5930416I19Rik
Tmem53
Cdca2
Ntf3
Gm8186
Trappc1
Setd8
Krt8
Pls1
Tsku
Zbtb45
Orai1
Tmsb4x
Armcx4
2810025M15Rik
Mettl21d
Rasl11b
H2afx
Rpp38
Tmx2
Gsg2
Lgals3
C77080
Tcf19
Gm17646
Hyls1
Fam100b
Ftl1
Tmem37
Pdik1l
Gprc5c
Camk2n2
Ercc6l
Gen1
Nup160
Ncald
Kif18b
Hspa14
Cbr1
E130306D19Rik
Tceal8
1100001G20Rik
Xrcc1
Cox6b2
Sox12
Tagap1
D630039A03Rik
Akr1b7
C430048L16Rik
Ppap2c
Opa3
Bhlha15
Taf9
Hbb-b1
Ezr
Rexo4
Prmt1
Nav2
Plekhg3
Nup107
Sae1
Rnaseh2a
Gm6180
Rnf26
9030619P08Rik
Slc22a26
Hunk
Thoc7
Ggcx
Nudcd3
Ostb
Cnn3
1810037I17Rik
Skp2
Fgfr3
Mdm4
Atpif1
Gimap4
Lclat1
Adam10
Hmgb2
Mtnr1a
Afp
Nfic
Fam72a
Fbxo6
H2-Q5
Cdca7
Gemin6
Abcd2
Per2
H2-T22
Rdh9
Usp39
Lig1
Ccdc18
Chst13
4930572J05Rik
Ier5
Gm5620
Ide
Mettl15
Snrpg
Mrpl18
Whsc1
E2f6
Brd9
Prtn3
Bak1
Xlr3a
Gm6984
Gm10033
Zfp809
Tpm3-rs7
BC021614
Idi1
Espl1
Upf1
Dhcr7
Gm15590
Gda
Gm17383
Tubb2a
Memo1
Fcer1g
Lin9
Zfp958
Gm10052
Gm10053
Hnrnpa3
Rpl18a-ps1
Rad51l1
Gm9242
Skap2
Tonsl
Ppp2r5d
Trp53
Gm10068
Akap17b
Nrm
Gm8355
9430015G10Rik
Hspa2
Alox5ap
Rp2h
Gm10075
Gm10076
Slc35e3
Gm8203
Ppih
Kng2
H2-Q7
Hist1h4i
Cd302
Ube2s
AI597468
Prcp
Mmgt1
Cyp3a59
Dnaic1
Phf5a
Hipk2
Snrpa
Mdc1
Med9
Gm2423
Ppp4r1
Gm10108
Lmnb2
Cks2
Gm10116
Arf2
Nsl1
Cys1
Gm6104
Lilrb4
Gm10121
Impdh2
Mtap
Msln
Lrrc40
Mapk3
Scoc
Gm5299
Gm10131
Nmral1
Snrnp70
Gm7665
Zfp238
Cycs
Gm8730
Tnfrsf11b
Amd2
Gm10146
Siva1
mt-Td
SNORA42
SNORD103
Snora7a
SNORA2
Snord35b
SNORA42
7SK
U1
Mir425
Snord42b
Snord7
SNORD18
Snord35a
SNORD63
C330021F23Rik
Gm13237
Prpf4
Gm10156
Rad54b
Hmgb1
Cdkn2d
Gm10184
Bub3
Nipal1
Lyar
Gm14403
Pcna-ps2
Slc22a27
Myl9
Pex26
Gm10226
Zfp948
2510049J12Rik
Tcp1
Cenpm
Ndufaf2
Lgals1
Pnp2
Myadm
Psrc1
Hist2h2be
Gm10254
Gm5641
Gm10259
Fgfr1op
Lyz2
Dazap1
Gm3699
Ube2u
Gm11428
Slfn9
Ccdc99
Hba-a2
Hba-a1
Ssbp4
Ccnd1
Serpinh1
Mesdc1
Rnf186
Gm10282
Ccnyl1
Acnat1
Gm5499
Safb
Gm10311
Dtnb
Nutf2-ps1
Nt5dc2
Ints5
Ttc9c
Ccnf
Sept5
Tuba1a
Gm10357
Atp5l-ps1
Gm9008
AW555464
Nfxl1
Sod3
Ripply1
Bhlhb9
Oip5
1810058I24Rik
H2-Q6
Lst1
C4b
Wdr90
Gm10509
Cep76
Gm6644
Apitd1
Gm10567
Mob3b
Hbb-b2
Gm6091
Osgin1
Snrnp40
Gm3776
Gsta1
2410076I21Rik
Apoc4
Ccdc61
Spc24
Gm16589
Zfp950
Itpa
Gas2l3
Itpripl1
Grk6
Amd1
Heg1
Cenpw
1700001L05Rik
Ly6a
H47
Gpx4
SNORD50
Mir692-1
Mir343
Ywhaq
2700094K13Rik
Ighg1
AC132082.1
SNORD70
Snord91a
SNORA40
AL626775.1
Klhdc7a
Gm12854
Gm10942
3110003A17Rik
C230096C10Rik
2610002D18Rik
1700024P16Rik
Cisd3
Haus5
Rad54b
Taf9
Hsbp1l1
Ces1b
Samd1
Hmgn2-ps1
Gm4694
Pigb
Utp14b
H2-Q1
Tmsb10
Kifc1
Haus3
AC175035.1
Dynlt1f
Xlr4a
Rpl28-ps3
Mir1191
Gm12891
Gm12372
Gm13772
Gm9836
Gm13160
Gm5940
Slc48a1
Gm11605
Gm13167
Gm5898
Anp32b-ps1
Ak3l2-ps
Gm13461
Ftl2
Gm1866
Glns-ps1
Gm13577
Gm14276
Gm12428
Gm14287
Gm7206
Gm15387
Gm15443
Gm11914
Dynlt1-ps1
Gm14150
Gm5844
Gm14822
Gm9432
Gm7816
Gm13502
Gm6335
Gm15542
Gm13226
1700045I19Rik
Gm15459
Xlr3d-ps
Gm15118
Gm12034
Gm12346
Gm4342
Gm12856
Gm14541
Gm11702
Gm13232
Gm15452
SNORD88
Mir1901
U6
4632419I22Rik
Gm13056
Gm13634
3110045C21Rik
Gm12335
Lin52
Gm12750
1110028F11Rik
Gm13021
A530020G20Rik
Gm11837
Gm15432
2810408I11Rik
Gm13203
Gm16174
Gm13493
SCARNA21
mmu-mir-2134-2
U6
SNORD123
Gm16165
Gm16550
Gm17295
Gm17385
Gm17555
Gm17621
Gm17492
Gypc
Snrpe
Gm6724
Gm4169
Gm17379
Gm6788
Gm17635
Lsm3
Gm17364
Hspa1b
1700007L15Rik
Gm6682
Dynlt1b
Gm3452
Gm6665
Lsm5
Gm3756
Gm5549
D17H6S56E-5
Gm17316
Cyp2a22
Gm3788
Hspa1a
Gm6450
Dynlt1a
Gm4482
Gm6793
Gm5819
Gm17530
Malat1
AC099934.1
AC132957.1
AC157822.1
AC150277.1
Mir3082
AC167122.1
Mir3098
AL929170.1
RP23-181K4.1
AC152922.1
Eif2c2
RP23-344J14.1
RP23-358B23.3
